# Supplementary material for: Lipid accumulation controls the balance between surface connection and scission of caveolae
Source: eLife. 2020 May 4;9:e55038. doi: 10.7554/eLife.55038 (PMC7239661; doi:10.7554/eLife.55038)
Supplement: Figure 1—figure supplement 2—source data 1. [file elife-55038-fig1-figsupp2-data1.xlsx]

## Sheet: Panel A
Panel A
Bodipy-LacCer synthesis
	1H-NMR Spectra of Bodipy-LacCer (600 MHz, CD3OD)							13C-NMR Spectra of Bodipy-LacCer (600 MHz, CD3OD)

## Sheet: Panel B
Panel B
z-Average (d.nm)
Bodipy-GM1	Bodipy-LacCer	Bodipy-Cer	Bodipy-Chol	Bodipy-SM C12	Bodipy-SM C5	Bodipy-PE
285	287.1	214.6	177.1	261.7	226.9	193.7
300	291.3	213	189.2	271.4	238.2	195.5
294	297.4	212.7	198.3	269.2	238.7	195
162.9	282	153.5	180.1	210	116.8	198.5
162.2	289.7	162.9	218.1	220.9	117	196.9
169.4	273	160	230.7	216.6	120	201.9
234.2	283.5	325	159.9	262.2	269.6
223.4	275.8	300	163.5	251.3	271.6
247.2	281.9	326.2	177.7	235.7	288

## Sheet: Panel C
Panel C
Total Bodipy FI (1 lipos.)	Total Bodipy FI (2 lipos.)	Total Bodipy FI (3 lipos.)	Total Bodipy FI (4 lipos.)
588	1081	1932	2435
686	1175	1792	2485
751	1401		2418
559	1448		2356
643	1482
651	1467
797	1309
	1067

## Sheet: Panel E
Panel E
Cell volume
Control	Bodipy-LacCer
4411	4765
2995	2622
3356	2527
4617	4939
3521	4269
4029	3632
4254	4417
3770	3799
