# Supplementary material for: Lipid accumulation controls the balance between surface connection and scission of caveolae
Source: eLife. 2020 May 4;9:e55038. doi: 10.7554/eLife.55038 (PMC7239661; doi:10.7554/eLife.55038)
Supplement: Figure 1—figure supplement 3—source data 1. [file elife-55038-fig1-figsupp3-data1.xlsx]

## Sheet: Panel A
Panel A
	Mass spectrometry measurement of SM C12 Bodipy (UHPLC-QqQ-MS)

## Sheet: Panel B
Panel B
Index	Sample	SM_C12_Bodipy_quant (865.6, 184.1)
		AU (arbitrary units/area under curve)
1	01_LacCer_B	20.61
2	02_LacCer_B	25.2
3	03_LacCer_B	22.01
4	04_LacCer_B	21.69
5	05_SM_B	724.88
6	06_SM_B	894.21
7	07_SM_B	766.75
8	08_SM_B	821.3
9	09_DOPE	23.86
10	10_DOPE	24.43
11	11_DOPE	25.07
12	12_DOPE	24.8
26	B2_SM_B	140.46
