# Supplementary material for: Lipid accumulation controls the balance between surface connection and scission of caveolae
Source: eLife. 2020 May 4;9:e55038. doi: 10.7554/eLife.55038 (PMC7239661; doi:10.7554/eLife.55038)
Supplement: Figure 1—figure supplement 4—source data 1. [file elife-55038-fig1-figsupp4-data1.xlsx]

## Sheet: Sheet1
Panel C
Caveolae per basal membrane
0 ng/ml Dox	0.5 ng/mL Dox	0.5 ng/mL Dox in TIRF
129	184	120
189	71	170
324	108	119
119	63	97
138	179	209
101	261	101
154	87	131
131	69	169
80	172	101
93	79	102
