# Supplementary material for: Lipid accumulation controls the balance between surface connection and scission of caveolae
Source: eLife. 2020 May 4;9:e55038. doi: 10.7554/eLife.55038 (PMC7239661; doi:10.7554/eLife.55038)
Supplement: Figure 1—source data 1. [file elife-55038-fig1-data1.xlsx]

## Sheet: Panel B
Panel B
Time (min)	Bodipy-LacCer (FI)	Bodipy-LacCer (FI)	Bodipy-LacCer (FI)	Bodipy-LacCer (FI)	Bodipy-LacCer (FI)	Bodipy-LacCer (FI)	Bodipy-LacCer (FI)	Bodipy-LacCer (FI)	Bodipy-LacCer (FI)	Bodipy-LacCer (FI)	Bodipy-LacCer (FI)	Bodipy-LacCer (FI)	Bodipy-LacCer (FI)	Bodipy-LacCer (FI)	Bodipy-LacCer (FI)	Bodipy-LacCer (FI)	Bodipy-LacCer (FI)	Bodipy-LacCer (FI)	Bodipy-LacCer (FI)	Bodipy-LacCer (FI)	Bodipy-LacCer (FI)	Bodipy-LacCer (FI)	Bodipy-LacCer (FI)	Bodipy-LacCer (FI)	Bodipy-LacCer (FI)	Bodipy-LacCer (FI)	Bodipy-LacCer (FI)	Bodipy-LacCer (FI)	Bodipy-LacCer (FI)	Bodipy-LacCer (FI)
1	-4.19971	-25.3197	3.58269	14.3859	-33.0509	-11.7517	-4.35331	-0.462113	-19.0989	-0.206113	-4.17411	5.55389	18.9171	-6.55491	18.2003	-9.31971	-5.53091	-19.6621	-11.7005	10.2899	25.3358	-3.54101	13.9182	0.273395	32.811	25.6942	29.1246	3.55019	25.4126	18.2958
1.5	-6.09083	-25.4956	-4.50363	-0.586831	-46.6156	-5.93723	-17.2012	-1.04763	-7.55003	8.50117	1.25637	4.89157	15.6948	-5.11803	16.5652	-5.24603	-15.7164	-22.1932	-15.742	1.69157	33.086	-13.25	22.3596	-0.705969	37.4124	27.5052	26.7884	6.20603	26.7116	18.6988
2	-17.3867	-6.73707	-2.38507	1.27573	-41.1435	-13.9307	-11.3451	7.29173	-9.01547	4.73173	9.95413	11.2085	28.8725	11.5669	32.3797	-6.25067	-9.01547	-15.7227	-3.12747	15.5605	25.1074	-16.3134	18.7074	6.00976	29.6642	23.597	27.3602	-7.12304	25.4914	14.3298
2.5	50.5675	111.368	62.8043	94.8555	18.5676	70.6891	66.1835	136.916	84.9227	82.0044	78.7788	148.667	129.953	143.009	115.08	67.9755	74.2732	75.6043	74.2732	118.075	17.7572	-10.6332	14.762	1.70601	38.0068	21.3412	30.0964	-7.12599	18.218	13.098
3	202.308	313.566	200.747	259.601	102.391	266.078	198.545	299.639	215.134	231.031	242.065	329.591	275.012	358.11	289.784	234.59	230.596	237.534	207.992	255.812	46.8395	-8.50773	50.1419	1.11787	53.9819	39.8251	35.2939	33.6811	98.5003	74.4875
3.5	413.815	574.532	392.388	483.32	290.859	527.684	362.436	610.679	457.668	548.548	543.582	643.806	525.585	773.137	612.139	560.273	477.278	520.516	429.432	598.699	226.952	151.56	226.338	113.391	272.572	215.689	226.645	256.956	331.452	304.444
4	714.65	917.018	613.632	765.491	441.011	846.592	585.907	935.322	659.354	799.258	891.546	938.982	872.55	1120.51	925.235	838.118	816.358	843.187	633.062	876.877	496.939	488.772	579.294	377.028	629.521	548.164	512.375	640.862	779.307	747.639
4.5	993.126	1232.13	905.114	1111.4	660.147	1195.29	821.171	1308.42	955.392	1170.64	1269.81	1313.95	1129.39	1533.62	1337.7	1188.68	1116.19	1120.59	901.069	1225.01	896.572	896.674	1065.48	768.981	1246.24	1002.86	1037.68	1065.22	1366.05	1267.11
5	1384.56	1606	1220.8	1445.59	809.609	1566.19	1159.28	1681.52	1339.71	1530.2	1660.42	1692.71	1461.38	1865.12	1806.73	1647.16	1508.05	1489.78	1106.98	1580.99	1329.35	1501.36	1560.95	1309.36	1763.86	1574.24	1602.96	1682.09	2014.4	1863.67
5.5	1721.42	1836.65	1503	1731.15	1074.92	1990.14	1326.36	2101.38	1548.85	1760.23	1937.95	1968.03	1835.19	2314.01	2105.8	2010.01	1746.82	1753.47	1332.33	1859.4	1842.15	1973.04	2065.74	1752.99	2300.42	2193.54	2021.04	2110.9	2657.31	2243.56
6	2019.92	2148.62	1713.16	2000.16	1242.73	2448.34	1587.41	2406.28	1779.87	2142.04	2264	2275.41	2034.52	2633.33	2517.87	2460.35	2127.47	2106.25	1568.52	2269.35	2273.07	2525.76	2793.05	2252.07	2831.45	2861.28	2783.94	2677.49	3044.52	3071.3
6.5	2311.91	2413.88	1967.41	2246.07	1390.85	2583.32	1754.91	2818.12	2036.45	2440.5	2577.49	2531.89	2342.63	3031.17	2781.95	2717.88	2362.55	2375.94	1645.08	2456.29	2766.51	3008.4	3170.01	2836.65	3352.24	3296.4	3232.76	3203.86	3809.37	3368.26
7	2547.75	2749.81	2357.31	2628	1574.31	2902.18	2018.24	2972.78	2372.85	2792.66	2872.12	2868	2673.7	3373.14	3142.82	3076.97	2676.54	2558.65	1939.85	2819.59	2996.79	3625.01	3672.4	3150.18	3858.59	4016.56	3651.2	3858.79	4374.35	3946.24
7.5	2906.27	2978.34	2458.66	2812.27	1698.16	3201.21	2246.26	3288.38	2458.51	3167.52	3282.31	3121.65	2920.1	3713.34	3379.47	3300.18	2692.62	2825.94	2089.56	3086.37	3508	4072.02	4124.27	3711.22	4231.87	4168.07	4090.38	4251.73	4901.82	4124.53
8	3196.24	3222.79	2655.32	2986.32	1913.3	3549.47	2501.67	3742.19	2739.59	3233.9	3435.12	3423.75	3110.2	4050.75	3781.2	3572.39	3086.16	3138.34	2239.16	3381.95	3755.72	4136.91	4418.97	3982.41	4753.28	4789.89	4572.8	4658.33	5151.39	4679.24
8.5	3527.1	3509.15	2926.65	3251.31	2042.35	3906.59	2613.69	3905.29	2883.85	3551.78	3802.07	3688.28	3395.16	4299.4	4193.93	3974.72	3312.85	3461.46	2544.24	3622.59	4114.3	4803.55	4696.08	4330.69	5129.46	5112.03	5032.54	4947.65	5649.99	5060.68
9	3709.19	3697.62	2911.62	3326.45	2150.51	4056.99	2917.39	3996.73	2927.04	3745.14	4029.45	3880.94	3556.31	4634.38	4287.7	4029.32	3353.22	3600.98	2580.05	3797.69	4291.28	4887.36	5052.68	4650.04	5274.84	5393.72	5204.13	5282.93	6018.26	5088.49
9.5	3855.9	3712.38	3113.45	3458.74	2184.24	4229.73	2858.32	4219.47	3061.94	3939.41	4231.09	4033.79	3648.08	4866.25	4541.08	4349.65	3568.1	3572.38	2751.9	3955.84	4484.01	5196.89	5412.16	4897.27	5784.88	5636.68	5661.15	5652.55	6501.8	5456.15
10	3906.4	4018.73	3267.91	3672.24	2347.36	4528.43	3037.1	4258.76	3227.77	4217.28	4358.6	4145.32	3816.21	4946.4	4620.41	4527.73	3698.68	3800.75	2821.93	4090.82	4788.11	5564.54	5591.06	5287.9	5850.92	6005.39	5679.94	5619.63	6538.03	5438.43
10.5	4141.96	4198.9	3497.15	3794.41	2358.87	4717.24	3139.47	4550.82	3637.18	4265.74	4520.07	4200.69	3877.64	5040.57	4782.09	4685.22	3956.69	3955.03	2944.83	4298.12	4787.41	5646.57	5802.5	5504.9	6123.84	6098.06	6114.93	5832.99	6776.15	6011.78
11	4312.99	4280.12	3726.4	4014.75	2386.82	4777.07	3263.65	4591.98	3635.23	4556.86	4647.02	4391.12	3923.28	5188.08	5011.08	4767.11	4100.21	4073.05	3078.69	4373.79	4961.43	5958.78	6064.95	5400.63	6190.1	6307.17	6182.27	6195.3	7121.72	5971.23
11.5	4497.54	4439.53	3740.93	4123.65	2388.28	5079.96	3320.47	4797.49	3751.07	4573.72	4770.66	4682.14	4180.81	5432.01	5313.23	4974.34	4253.62	4443.03	3204.79	4493.52	5225.05	6175.6	6226.72	5862.95	6796.07	6578.39	6396.58	6459.89	7669.05	6124.78
12	4639.57	4660.49	3813.05	4257.85	2511.47	5164.48	3470.86	4987.3	3755.86	4791.53	4971.66	4869.05	4313.2	5685.21	5373.83	5147.89	4421.54	4465.06	3284.74	4700.48	5417.09	6409.98	6282.39	6043.44	6806.91	6921.01	6626.87	6200.27	7736.01	6442.03
12.5	4822.47	4760.39	4009.41	4377.72	2713.8	5222.98	3503.33	4922.92	3966.53	4859.64	5206.52	4815.53	4484.8	5688.47	5471.17	5293.92	4551.49	4608.45	3325.51	4944.63	5533.67	6467.02	6704.61	6109.47	7010.97	7022.77	7114.83	6652.42	7784.94	6701.34
13	4970.38	4612.82	4000.85	4465.08	2767.09	5369.17	3685.82	5015.77	4096.78	5125.36	5280.6	5064.58	4445.52	5776.14	5601.47	5207.38	4627.18	4526.24	3288.25	4956.02	5735.98	6685.94	6834.24	6267.31	7576.11	7350.19	7262.89	6736.27	8237.94	7005.79
13.5	5048.85	4691.83	4199.29	4566.88	2718.48	5460.55	3577.05	4893.02	4231.06	5102.56	5378.68	4939.82	4613.47	5750.72	5537.09	5560.13	4831.07	4581.47	3384.88	4995.65	5863.16	6869.32	6928.89	6362.39	7260.2	7419.77	7353.26	6762.23	8309.39	6649.9
14	4777.55	4914.77	4092.83	4455.24	2879	5338.47	3661.72	5220.22	4025.8	5157.86	5534.08	5085.31	4487.83	5861.86	5547.29	5467.57	4537.29	4821.07	3355.65	5093.5	5746.94	7073.77	7244.65	6575.64	7588.69	7680.56	7306.24	6873.88	8200.27	6917.53

## Sheet: Panel C
Panel C
SM(d18:1/16:0) (pmol)
Control	Myriocin	Smase
408.679	290.879	183.953
402.833	294.141	184.362
395.769	276.072	189.59

## Sheet: Panel D
Panel D
Lipids (pmol)
Bodipy-LacCer	LacCer(d18:1/16:0)	Bodipy-SM C12	SM(d18:1/16:0)	d7-Chol	Chol
4.0545	4.06613	2.3597	410.441	1.0076	3730.2
4.20967	3.89011	3.04342	416.192	0.92265	3677.19
4.129	3.94784	2.52876	386.774	0.9718	4071.72
4.42623	3.65081	2.74902	396.239

## Sheet: Panel E
Panel E
	Total Bodipy FI (a.u.)
Time (min)	Bodipy-GM1	Bodipy-GM1	Bodipy-GM1	Bodipy-GM1	Bodipy-GM1	Bodipy-GM1	Bodipy-LacCer	Bodipy-LacCer	Bodipy-LacCer	Bodipy-LacCer	Bodipy-LacCer	Bodipy-LacCer	Bodipy-Cer	Bodipy-Cer	Bodipy-Cer	Bodipy-Cer	Bodipy-Cer	Bodipy-Cer	Bodipy-Chol	Bodipy-Chol	Bodipy-Chol	Bodipy-Chol	Bodipy-Chol	Bodipy-Chol	Bodipy-SM C12	Bodipy-SM C13	Bodipy-SM C14	Bodipy-SM C15	Bodipy-SM C5	Bodipy-SM C6	Bodipy-SM C7	Bodipy-SM C8	Bodipy-SM C9	Bodipy-SM C10	Bodipy-SM C11	Bodipy-SM C12	Bodipy-SM C13	Bodipy-SM C14	Bodipy-SM C15	Bodipy-SM C16	Bodipy-PE	Bodipy-PE	Bodipy-PE	Bodipy-PE	Bodipy-PE	Bodipy-PE	Bodipy-PE
0	80.55	0.966684	46.3458	109.446	64.0818	100.063	-0.42	4.98245	-62.108	47.8961	-21.7027	0.286666	35.3804	23.2394	49.2454	92.1855	79.9798	99.0835	101.045	31.6363	22.3241	3.0936	27.68	-5.76617	109.141	2.61	78.5853	49.99	62.7	0.04	24.87	188.68	142.07	72.72	121.27	158.038	159.78	166.31	20.3533	78.3763	68.48		53.4123	69.7983	-33.67
0.5	75.56	0.87	41.19	107.68	69.78	101.37	21.38	18.8	-48.24	69.57	-14.93	30.7	31.379	5.36006	55.988	77.143	54.8458	89.1517	121.923	46.9908	43.524	-4.13725	21.2	-21.3417					44.76	0.97	33.31	163.58	107.92	34.36	82.7	141.61	150.4	162.34	2.92	48.91	77.28		72.56	78.12	-8.4
1	140.45	44	101	944	806	904	13.64	218	-323	183	-31	93													113	3.08	63	43	69.06	29.12	52.71	288.88	221.33	117.36	196.62
1.5				934.44	961.15	937.42	347.57	285.62	-141.17	401.08	266.35	414.11				640.787	888.216	885.362	770.584	1002.76	1184.32	284.73	547.31	-171.701					87.37	51.59	53.61	347.04	351.92	192.95	306.55							1960.83	2017.11	2712.62		1750.5	727.74
2	241.04	85.73	182.93	1448.86	1543.11	1441.89	640.12	477.51	55.51	1031.24	86.9	1197.33	1005.75	1379.76	1383.19	975.592	1041.91	960.985	751.219	1354.15	1433.8	947.066	1366.4	446.596	804.25	918.29	900.08	829.64	23.67	-27.03	13.1	283.16	236.9	164.32	223.62	811.44	661.18	905.96	768.22	809.94	1793.86	2378.99	2584.27	3617.56	3798.9	3419.6	3423.19
2.5	305.91	101.18	217.19	1724.46	2202.12	1741.02	1005.62	709.07	217.95	1257.21	331.22	1650.04	1124.64	1191.59	1354.48	1363.96	1477.51	1298.53	628.003	1192.21	2092.82	1173.87	2468.87	340.762					75.28	12.6	44.09	328.7	205.78	169.38	282.3	896.98	746.08	958.6	953.04	1199.57	2060.86	3235.81	1570.99	3587.05	4889.05	4183.65	3766.59
3	479.42	107.75	321.71	2014.01	2722.93	1998.2	1179.31	785.96	362.1	1597.04	596.55	2081.72	1292.05	1103.62	1941.99	1476.08	1934.93	1732.38	618.273	2366.37	2775.35	2096.02	3854.49	432.594	1390.98	1614.26	964.8	959.98	79.27	21.28	57.43	471.53	327.17	270.75	410.09	1027.65	927.45	1241.49	1420.81	1707.09	2131.69	4565.98	3417.37	5479.91	6325.38	4678.45	4187.6
3.5	709.82	261.43	559.81	2316.76	2929.16	2312.35	1682.63	1178.07	607.69	1570.36	851.65	2409.93	1559.9	1157.57	2253.48	1539.78	2221.72	1964.66	665.364	2562.73	2772.85	1808.1	5127	1318.6					83.91	33.83	68.32	482.73	346.46	314.35	432.18	1279.08	1005.92	1208.07	1703.77	2261.52	2849.03	5344.35	4953.54	6144.7	7456.9	4498.67	3318.74
4	853.13	350.02	835.86	2524.1	3042.62	2558.59	1974.85	1575.42	849.07	2120.8	1018.77	3000.96	1928.76	1377.9	2631.14	1572.12	2347.1	2131.87	1335.09	2695.99	2452.33	1672.96	5210.32	2031.63	2881.34	2548.12	2468.52	2191.26	105.18	44.11	82.19	565.94	372.87	332.97	487.29	1294.89	1093.44	1323.81	1687.06	2452.72	2671.4	5380.97	5052.56	5629.19	7120.15	5606.58	3973.15
4.5	1074.71	515.2	999.63	2723.58	3431.16	2786.15	2312.22	1819.88	1127.2	2486.66	1302.97	3661.77	1963.05	2037.16	3165.65	1985.51	2351.32	2182.02	1483.9	3103.25	3637.4	1637.57	4740.87	1181.35					151.6	123.07	140.55	647.06	415.77	411.82	576.09	1514.81	1210.92	1519.01	1739.54	2501.63	2323.12	4990.68	6646.38	6598.41	7251.81	5578.93	3871.04
5	1191.63	534.01	1208.05	2988.98	3826.99	3076.02	2559.9	2301.17	1444.29	3003.73	1411.39	4070.73	2459.17	2541.93	3084.16	2222.86	2427.23	2273.88	2899.12	3364.85	4499.12	1653.99	4570.05	1262.24	4621.8	2221.84	2027.5	2552.78	232.25	202.32	243.18	736.23	443.17	495.39	676.75	1679.83	1278.8	1695	1740.86	2499.47	2430.6	4577.98	5523.97	6361.48	6877.72	5611.59	3727.64
5.5	1256.93	655.64	1303.86	3048.66	3962.38	3169.86	2698.07	2241.46	1861.05	3541.64	1382.71	4565.68	2613.07	3102.32	3286.63	2449.83	2580.77	2375.77	2818.2	4055.97	4321.49	1621.43	4890.87	1910.38					307.5	252.48	255.41	869.45	573.99	540.93	818.98	1840.63	1410.13	1780.25	1882.36	2522.4		4726.33	5925.78	6667.91	7026.78	5075.45	3542.26
6	1424.19	799.16	1419.02	3259.32	4189.52	3325.42	2784.73	2454.62	2498.5	3670.87	1720.16	6287.39	2585.97	3105.59	3002.88	2481.1	2649.25	2435.96	2545.95	4402.42	4148.5	1513.27	5024.44	1679.25	4377.04	2426.15	3280.51	2291.73	429.3	347.35	377.99	1086.35	745.42	664.22	942.96	1692.06	1422.25	1802.4	1793.15	3045.92		4182.37	5621.26	6571.05	5765.75	4697.65	3501.43
6.5	1587.52	1039.24	1544.89	3448.91	4164.21	3477.97	2995.74	2622.98	2757.82	4091.16	1589.96	5170.07	2497.54	3201.83	2953.24	2371.01	2578.69	2372.13	2123.54	4921.85	4250.33	1313.53	6213.91	1912.1					526.69	413.09	429.61	1156.07	735.39	738.68	1059.85	1905.76	1461.62	1807.31	1626.58	3080.62	2220.28	4196.28	5196.28	7118.51	6423.49	4965.11	3504.62
7	1772.76	1078.2	1660.61	3625.46	4222.87	3637.42	3224.82	2693.35	3090.32	4335.37	1786.23	5193.15	2396.13	3340.9	2669.2	2478.58	2525.27	2230.45	2077.81	4699.48	4593.39				3957.1	2498.19	3273.47	2159.4	605.68	555.56	521.46	1296.38	937.52	917.55	1241.63	2018.51	1475.91	1731.07	1519.82	3268.14	1970.27	4937.46	5833.92	7612.76	6554.34	4914.53	3614.8
7.5	1914.75	1244.96	1710.79	3713.32	4492.81	3748.97	3551.72	2959.47	3314.95	4578.49	2146.99	5105.29	2460.1	3302.36	2664.89	2270.91	2544.8	2223.18	2084.89	4661.36	6623.28	1237.42	5192.31	2403.5					764.05	661.94	617.02	1490.24	1020.44	961.84	1384.2	2178.66	1487.39	1758.98	1625.39	3192.5	1558	4806.25	5457.96	6731.57	5686.98	4465.44	3347.33
8	2137.94	1350.85	2198.72	3989.86	4383.08	4009.88	3673.82	3058.35	2926.4	4727.83	2434.08	5598.9	2513.1	3557.68	2503.07	2342.02	2517.88	2168.52	2087	5246.16	4725.18	1746.12	4908.19	2520.58	4847.3	2501.52	2741.48	2164.38	871.24	824.88	741.2	1479.23	1220.84	1089.9	1408.68	2199.45	1447.92	1743.66	1537.73	3086.61	1895.19	4035.84	6327.59	6594.29	6984.55	4288.98	2936.27
8.5	2338.14	1555.79	2336.36	4262.43	4866.56	4278.22	3873.97	3244.62	3344.02	4797.96	2464.48	5684.38	2837.17	3687.79	2711.06	2321.14	2599.1	2243.19	2188.95	5187.85	4467.63	1905.58	4424.75	2254.12					923.52	866.9	741.94	1527.49	1227.36	1010.21	1409.8	2357.54	1491.66	1743.1	1422.68	2932.51	1685.3	3556.6	4657.51	6178.55	6244.43	3844.84	3224.62
9	2308.87	1651.74	2276.99	4581.51	5045.11	4589.81	3988.17	3475.95	3693.6	5071.39	2883.76	5787.35	2875.01	4147.63	2595.54	2218.71	2612.76	2228.39	2662.19	5012.38	4313.86	1803.58	4525.89	2387.5	4210.9	2418.88	2395.18	1938.48	957.21	903.78	755.93	1773.2	1485.04	1177.35	1647.39	2361.24	1598.16	1859.36	1525.52	3020.22	1892.19	4190.49	4987.75	6012.6	5251.57	3338.25	2013.93
9.5	2484.89	1960.52	2421.9	4616	5176.29	4615.13	4124.65	3613.33	3719.66	5374.83	3158.97	6410.15	2932.05	4187.77	2654.08	2135.81	2679.84	2287.13	2997.64	4764.86	4485.55	4229.21	4629.25	2572.07					1033.66	980.8	849.19	1964.4	1601.33	1159.15	1678.58	2559.49	1653.76	1918.91	1652.25	3200.08	1948.6	3912.43	4865.77	6314.5	5077.14	3690.18	2858.33
10	2879.92	2327.44	2534.73	4777.12	5225.66	4790.08	4312.61	3930.42	4219.27	5461.82	3269.89	6717.67	3212.6	4240.12	2728.17	2049.8	2674.42	2250.4	2336.08	4576.26	4485.77	5060.56	4348.46	2252.8	3773.77	2487.94	2414.23	1816.63	1128.24	961.39	853.64	2116.09	1738.45	1359.07	1881.94	2660.46	1674.09	1902.09	1715.12	3301.87	1665.72	3680.84	4248.56	5503.89	4132.06	3052.34	2424.92
10.5	2884.58	2163.33	2582.02	4746.66	5175.5	4766.69	4439.64	4413.3	4103.84	5468.65	3892.55	6597.87	3572.98	4209.15	2661.69	2056.58	2747.94	2281.8	2038.03	4171.08	4442.78	4488.53	4618.3	1918.44					1130.49	1023.57	862.34	2642.69	1991.42	1521.07	2104.34	2779.69	1861.64	2054.75	1758.32	3150.17	1542.92	3462.27	4596.09	5486.38	5069.74	2954.59	2133.93
11	2791.79	2384.57	2694.23	4803.29	5338.01	4747.87	4858.54	4508.4	3888.28	5533.82	4362.66	6822.01	3934.97	4246.1	2796.81	2057.05	2733.66	2329.72	2047.11	3900.6	4163.96	4253.51	5144.75	2141.2	3125.14	2343.51	2095.89	1532.63	1316.92	1169.7	979.11	2628.11	2060.09	1697.12	2298.26	2828.25	1816.21	2022.72	1878.36	3172.12	1886.24	3264.1	4281.36	5299.58	5075.21	3045.9	2473.8
11.5	2984.54	2542.33	2968.77	4773.67	5279.31	4752.97	4931.23	4551.37	3426.55	5752.05	4631.45	7138.03	3944.83	4311.9	2860.45	2007.89	2785.65	2278.89	1941.42	3892.06	4115.44	4586.58	4823.3	1773.14					1348.02	1266.33	1061.07	2875.91	2362.59	1775.61	2405.52	2891.09	1874.5	2149.23	2085.38	3017.61	2130.8	3223.2	4452.72	5850.87	5133.22	2877.37	2089.62
12	3527.3	2668.88	3057.37	4738.81	5841.55	4728.31	5255.14	4687.22	3457.85	5809.9	4977.68	6950.58	3925.75	4315.17	2991.94	1984.64	2696.8	2633.21	2041.76	3724.28	4282.77	5164.02	4853.09	1813.3	2642.37	2550.9	2069.93	1229.17	1428.84	1282.65	1198.02	3107.08	2495.25	1773.73	2542.86	3036.75	1937.92	2298.54	1904.15	3116.6	1806.12	2810.51	4272.32	5664.54	3610.87	2640.37	1761.4
12.5	3622.5	3014.45	3310.2	4784.91	5604.5	4761.83	5269.05	4777	3747.29	5919.88	5486.55	6962.21	3631.04	4394.32	3152.8	1983.01	2656.48	2666.84	2013.11	3979.32	4071.9	4174.17	4718.08	1727					1504.69	1419.44	1415.9	3180.53	2545.27	1773.47	2548.82	3269.31	1953.91	2330.5	1957.45	3307.91	2562.24	2615.17	4310.98	5304.44	4091.77	2749.05	1828.56
13	3914.02	3033.77	3417.63	4779.06	5469.12	4813.43	5449.86	4708.41	3553.49	5998.45	5818.98	7247.37	3710	4664.32	3591.56	2093.11	2645.3	2607.37	1813.04	4252.34	4007.04	4097.82	4214.72	1491.92	2523.11	2543.26	3690.34	1182.48	1624.39	1520.94	1508.74	3311.24	2826.5	1872.56	2750.96	3540.01	1943.73	2325.54	1895.93	3195.82	2665.81	3883.66	4265.49	5576.18	4964.69	3015.68	1866.62
13.5	4361.4	3165.52	3686.65	4852.8	5363.75	4829.62	5778.77	5012.59	3903.66	5857.32	5906.38	7076.97	3732.24	4855.78	4108.55	2069.04	2653.18	2787.56	1639.42	4553.81	3819.05	4072.62	5077.8	1620.99					1918.91	1628.04	1725.06	3606.92	3101.05	2018.66	3075.17	3569.28	2001.27	2311.67	2055.7	3155.15	1951.53	3032.73	3939.36	5220.28	3526.03	2494.7	1956.36
14	4323.56	3050.32	3986.17	4577.82	5172.18	4565.93	6213.87	5079.54	3768.93	6171.32	6108.47	7112.11	3762.92	4882.27	4316.77	2028.69	2849.04	2871.58	1612.39	3994.13	3454.49	3634.94	4459.11	1788.65	2147.79	2051.25	3919.5	1159.78	2090.59	1719.48	1890.68	3021.31	2684.56	2018.87	2980.71	3441.04	1959.37	2428.24	2046.78	3158.86	1693.52	3615.19	5322.14	5479.19	3484.32	2165	1965.85
14.5	4587.37	3526.7	4400.28	4528.28	5062.99	4480.77	6567.13	5277.79	3895.92	6343.62	6115.64	7187.49	4056.41	5074.13	4404.45	1883.87	2971.44	2705.92	1487.86	4218.79	3571.62	3401.99	4262.19	1922.08					2241.94	1916.22	2035.85	3393.21	3204.08	2336.7	3349.97	3523.53	2148.75	2610.78	1975.49	3057.8	1731.78	2232.58	7989.02	4028.88	2752.26	2488.94	1785.45
15	4658.89	3304.34	4301.22	4548.91	4968.76	4506.04	6866.31	5328.64	4135.15	6439.47	6037.1	7077.21	4054.93	5227.68	4157.5	1944.34	3062.93	2702.72	1513.17	3537.68	3438.29	2225.51	3513.18	761.306	2022.5	2113.88	3694.93	992.38	2318.45	2056.42	2143.41	3366.17	3166.12	2235.98	3354.78	3608.32	2219.49	2681.51	1975.49	3057.8	1308.64	2594.69	9578.69	4216.23	3411.61	2295.86	1899.65

## Sheet: Panel F
Panel F
Time (sec)	Bodipy-GM1 (FI)	Bodipy-GM1 (FI)	Bodipy-GM1 (FI)	Bodipy-GM1 (FI)	Bodipy-GM1 (FI)	Bodipy-GM1 (FI)	Bodipy-GM1 (FI)	Bodipy-GM1 (FI)	Bodipy-GM1 (FI)	Bodipy-GM1 (FI)	Bodipy-LacCer (FI)	Bodipy-LacCer (FI)	Bodipy-LacCer (FI)	Bodipy-LacCer (FI)	Bodipy-LacCer (FI)	Bodipy-LacCer (FI)	Bodipy-LacCer (FI)	Bodipy-LacCer (FI)	Bodipy-LacCer (FI)	Bodipy-LacCer (FI)	Bodipy-Cer (FI)	Bodipy-Cer (FI)	Bodipy-Cer (FI)	Bodipy-Cer (FI)	Bodipy-Cer (FI)	Bodipy-Cer (FI)	Bodipy-Cer (FI)	Bodipy-Cer (FI)	Bodipy-Cer (FI)	Bodipy-Cer (FI)	Bodipy-Chol (FI)	Bodipy-Chol (FI)	Bodipy-Chol (FI)	Bodipy-Chol (FI)	Bodipy-Chol (FI)	Bodipy-Chol (FI)	Bodipy-Chol (FI)	Bodipy-Chol (FI)	Bodipy-Chol (FI)	Bodipy-Chol (FI)	Bodipy-SM C5 (FI)	Bodipy-SM C5 (FI)	Bodipy-SM C5 (FI)	Bodipy-SM C5 (FI)	Bodipy-SM C5 (FI)	Bodipy-SM C5 (FI)	Bodipy-SM C5 (FI)	Bodipy-SM C5 (FI)	Bodipy-SM C5 (FI)
0	100.562	100.856	100.975	99.8526	100.518	100.343	99.0835	96.6353	100.264	98.7173	99.681	102.116	102.463	100.508	100.281	99.6157	101.687	98.4844	101.327	100.602	99.4565	98.9614	101.171	101.16	100.352	100.292	100.81	99.5667	101.472	99.7776	102.665	96.844	99.3823	99.933	99.1549	98.0816	94.7195	102.601	100.468	102.664	100.449	101.959	98.9345	99.2363	98.9036	101.459	100.298	98.3384	101.287
2	100.751	99.9952	99.6928	99.3976	100.116	100.178	100.564	99.5981	101.337	100.821	99.2034	102.612	98.5123	102.199	99.7111	100.415	97.3357	100.676	98.8744	98.4905	98.5867	100.425	100.253	98.4101	103.069	98.54	101.164	100.231	100.261	99.6367	97.5635	99.4869	98.9285	100.012	100.244	101.197	103.732	99.2248	99.9358	100.746	101.023	99.2067	100.955	98.7396	97.9407	101.612	103.915	100.863	101.281
5	98.6864	99.1483	99.3319	100.75	99.3658	99.4788	100.353	103.766	98.3996	100.462	101.116	95.2722	99.0246	97.2926	100.008	99.9689	100.977	100.839	99.7981	100.908	101.957	100.614	98.5759	100.43	96.5788	101.168	98.0261	100.202	98.2665	100.586	99.7717	103.669	101.689	100.055	100.601	100.722	101.548	98.1744	99.5961	96.5903	98.5274	98.8344	100.111	102.024	103.156	96.9295	95.787	100.798	97.4317
8	21.6853	20.7077	21.5606	18.3179	25.3991	20.8698	18.656	28.5008	17.4997	25.9654	30.4823	21.2257	5.20708	30.6501	7.17879	16.6194	16.1679	25.0547	17.1607	13.9274	9.0247	7.77159	10.4841	8.47577	6.1614	12.2061	10.1571	10.2222	11.1823	10.4001	4.92198	9.78151	8.75009	6.59274	6.35548	6.96652	4.33064	5.95051	6.16563	6.97599	17.8236	10.3031	23.5838	20.613	9.54219	9.73256	15.4486	23.8395	11.9385
11	33.4381	31.9997	35.6245	28.91	39.9444	35.5692	28.9783	43.9497	31.9673	37.6712	41.4514	33.2463	9.03075	39.5413	14.5818	26.6186	27.0057	35.7755	30.2944	28.9526	24.3269	17.7071	21.4851	18.7689	14.7303	22.1361	19.3468	22.8448	17.1673	19.3314	19.0559	24.1174	19.6375	16.0292	17.8864	16.6884	12.8708	22.1848	20.446	15.6561	29.3545	18.3787	31.1781	25.3319	19.2308	19.8687	21.3412	31.8097	20.9136
14	41.6724	42.9387	45.2445	38.7841	51.1337	45.9431	39.8255	55.6854	38.9889	45.002	48.866	39.9769	16.2533	43.9473	21.0139	35.0504	36.0765	44.2781	39.94	40.5017	34.5392	27.607	28.2801	27.786	21.9927	29.6527	26.0469	32.4759	22.4365	26.3622	35.3934	35.5611	31.2121	25.5669	30.2062	25.6783	21.0971	32.1203	33.9013	24.8037	40.3296	23.9949	36.1427	35.2614	27.727	28.4817	26.6994	38.2084	26.1846
17	45.7971	46.9504	52.0934	43.1895	57.1487	51.0815	44.4134	61.6968	44.4334	51.5	52.2199	40.9841	20.7745	47.2531	23.3478	39.9679	40.8386	49.7616	46.5272	46.5884	40.8207	32.7324	32.6024	32.5968	25.822	33.7666	30.5357	39.2251	24.9768	30.6837	38.9866	46.2224	39.5007	30.2025	37.0958	29.9457	24.8825	39.9908	40.8587	28.9769	46.0266	27.9374	38.1304	39.7648	30.8115	34.0847	30.3334	41.5029	30.0166
20	50.1973	51.9576	55.8229	47.2387	64.1419	54.1919	47.9626	67.0925	42.9705	52.9362	56.5261	43.193	23.9068	50.2313	26.113	41.2821	45.4047	52.1706	53.364	51.4155	46.2452	36.3937	36.0584	38.0818	29.0592	37.489	34.1668	42.9678	26.6252	33.907	43.6135	50.0387	42.5029	33.8147	42.5677	33.3235	26.8608	43.2522	43.9981	31.9292	50.5674	31.5006	41.337	42.5676	35.9421	39.3167	33.8261	44.2919	33.027
23	54.1598	55.0399	59.2999	51.1368	70.212	58.2782	51.575	71.4882	49.4241	57.0864	57.0921	49.7699	27.5404	51.553	29.0471	45.5649	48.988	54.0104	55.4929	55.6013	48.0916	40.9421	39.7404	40.883	31.2094	39.4868	36.8192	46.6001	27.6579	37.3801	47.991	52.4233	45.8529	35.5226	45.2867	38.9052	28.2612	46.1864	48.1673	35.2069	56.9327	34.1229	45.6428	45.8352	38.912	46.7292	35.496	46.7314	34.747
26	55.868	57.9218	62.9448	53.1718	73.1967	61.4144	55.9	73.0653	53.5705	60.1022	59.5519	48.2664	29.9354	53.2852	30.2002	48.7438	49.7884	57.1596	57.6009	57.6307	51.0427	42.5028	40.5348	44.0695	35.0666	41.2672	38.0614	48.2742	28.9604	39.83	48.6897	56.8334	45.6939	37.7015	48.0002	37.0058	30.8973	49.2142	53.3912	37.8559	59.3506	37.3186	45.9059	47.6348	39.2917	51.8097	36.6687	48.174	35.9584
29	58.0837	59.1908	64.5756	54.8322	76.3378	62.3712	57.9586	76.926	53.8323	62.5245	59.6049	50.4681	33.3582	53.1331	32.1587	50.0306	50.7551	57.5466	59.0151	60.931	53.2207	44.5263	41.7702	44.6575	37.3633	42.6026	39.6837	50.3032	30.1925	42.1918	49.7839	53.4144	46.4367	39.1185	49.7536	38.8707	30.2528	49.6091	55.153	38.6217	62.4113	38.6576	48.4917	48.9249	42.0716	55.6755	37.6437	50.1664	37.3934
32	61.2415	60.5338	66.5533	56.6932	78.4367	65.6355	59.0286	79.971	53.2193	64.3985	61.1468	54.7084	36.4667	54.1797	33.5218	52.0216	52.9511	62.1205	60.5342	61.7789	55.613	46.9267	43.0929	47.15	38.8961	44.9276	40.9723	52.4816	30.6014	44.3192	51.4542	55.481	47.1569	39.8733	51.8065	42.1608	29.9269	50.6176	59.7732	40.044	65.7891	41.5034	50.2379	49.4103	42.2365	59.4107	39.3423	50.6337	38.4378
35	62.8252	62.2457	67.0111	58.7338	82.8405	67.2784	59.6814	78.3359	55.9267	63.227	62.792	55.8268	37.345	55.4993	34.304	52.5817	54.753	62.8501	62.6287	63.9928	55.4886	47.4809	43.1849	47.9892	40.9098	44.2687	42.199	53.4993	31.3063	46.028	54.7159	58.0108	48.5786	41.0686	53.9559	44.2911	32.4947	53.4021	60.7618	41.0131	67.3936	43.7169	51.0075	50.5653	43.8822	61.5347	39.9329	52.5181	39.0226
38	63.782	64.7911	68.8311	60.0761	82.1127	69.4186	56.8175	74.9376	56.6234	67.6816	63.7249	55.5566	39.1969	55.209	36.3333	54.1939	58.3031	65.9327	62.8299	63.0604	56.6651	49.1166	44.4652	48.564	41.6239	47.5767	44.1945	55.2593	32.047	47.3852	53.4814	56.3059	47.5404	40.8816	55.4099	44.0889	32.3355	58.5069	61.4625	42.2298	69.1239	44.8709	52.7814	50.8854	43.7415	61.2415	40.1516	55.9334	39.5951
41	65.1403	66.7709	69.4588	61.6805	84.9885	68.0058	62.9643	78.8681	59.1122	67.2145	63.9677	55.8564	41.0894	54.8667	35.6116	54.5221	60.5055	66.3384	63.3912	65.8714	58.3777	51.7312	45.7961	50.6815	42.5339	49.3723	44.3496	57.1884	31.874	48.3622	55.2735	55.8531	50.089	43.9471	55.0296	46.1425	31.843	61.8654	64.8963	44.2993	70.3603	47.6103	53.5419	50.4304	44.3556	65.6934	41.2065	56.2348	39.6696
44	67.153	68.525	72.1447	62.5168	85.6158	69.6979	63.8088	78.6672	60.0879	68.2194	64.6418	57.7886	42.4395	56.4353	37.4743	56.7876	62.4756	69.4383	63.3404	64.8692	59.8123	51.8168	45.6616	51.1433	43.694	49.7159	44.9062	57.9029	32.8912	49.443	56.0523	56.932	49.9724	45.0996	54.4479	46.9269	33.0539	61.192	66.4681	47.5734	72.0332	50.1736	58.5208	52.0597	44.4391	64.9231	41.3833	57.2454	39.4441
47	66.1435	67.306	76.6498	63.6145	86.693	70.7724	62.5606	86.0987	61.8106	65.1253	64.6755	55.7072	44.6663	55.7902	38.5767	58.2915	62.7562	70.7969	65.4552	65.5127	60.7909	53.5919	47.3721	51.4716	45.1993	50.7595	46.5168	59.6429	33.3309	49.9282	53.2033	56.9305	48.694	46.0036	57.2504	45.4756	34.5791	66.6701	67.0219	46.1607	73.6262	51.7095	59.1291	50.3091	46.7997	68.2957	41.8303	54.7364	39.4557
50	67.5821	67.833	76.7063	64.4749	87.076	70.0465	63.5158	87.0228	59.3611	68.8252	64.6371	55.1928	45.8967	57.7502	38.3294	59.3622	64.348	72.5054	65.0871	67.1982	60.153	55.4331	47.3322	53.1528	46.7714	52.1429	46.2429	61.5031	33.3125	49.6003	55.1193	56.7623	49.1748	46.9589	57.7445	49.5763	34.5222	67.1829	71.0481	46.0405	73.9862	51.3569	62.9639	51.2405	48.5133	66.0683	43.0622	56.5617	39.9017
53	68.0236	68.7917	74.9298	64.8761	89.4095	71.0432	70.4794	88.2434	60.6961	68.2809	63.6343	55.3757	47.4005	54.319	40.0903	58.5521	65.3177	73.3388	67.5823	68.1551	61.509	55.6512	48.6933	53.5887	48.0507	52.3724	47.338	61.0536	33.6292	50.2828	54.7477	55.4608	48.6816	49.7057	59.518	50.7652	36.4503	68.7597	71.4182	49.6565	76.2066	52.7753	64.8064	50.3558	51.5985	67.3355	43.8712	55.3156	39.8881
56	69.7882	69.888	73.8392	66.8664	91.1851	73.2459	71.0663	88.8653	59.9088	69.2559	63.2234	60.5711	48.1857	55.5385	40.73	59.5949	68.5499	71.9684	68.3506	67.5881	62.5478	55.9744	48.4727	55.1474	48.1605	54.7811	47.8763	61.9696	34.0978	52.7451	58.0754	55.2211	51.6432	48.4177	60.5863	52.8589	35.8473	70.9737	71.1184	47.2215	76.1075	54.3761	67.7043	52.7734	52.0973	68.3554	44.1457	57.6559	40.1056
59	71.8676	69.6277	79.3872	68.7307	93.3289	73.4629	70.9023	87.6166	56.489	69.6103	63.6285	62.7116	48.7933	60.358	41.9681	59.5386	68.0071	75.5735	69.3828	66.9614	63.3761	56.8291	50.4573	54.1786	48.9155	57.8394	48.4644	63.6831	33.766	54.0848	57.3751	57.5387	50.4492	46.0803	61.1355	49.5684	34.9406	70.2789	75.0648	48.8833	77.309	55.5062	65.9911	51.6091	53.4009	71.2949	45.4995	57.8263	39.7329
62	71.8159	70.3723	81.3509	70.0251	92.3371	74.8987	70.5924	89.2865	60.3258	70.5181	64.9214	63.6943	51.2084	59.8413	41.705	59.6663	74.0968	75.9583	70.9539	68.3009	62.5936	58.2631	50.7411	56.1856	48.2166	56.2287	48.5085	64.0279	34.1696	52.4721	58.274	54.9384	53.0797	46.9216	60.2814	49.2814	36.701	69.0973	73.9582	50.738	79.2231	56.586	63.5576	52.0785	53.3108	67.9757	46.2142	57.044	40.3765
65	73.1091	70.2533	80.1201	69.5893	94.5795	75.464	71.4845	89.8115	60.1829	68.5764	66.8431	61.2835	50.0954	60.7064	41.1913	60.6991	75.6493	75.7592	71.0365	67.8127	65.8007	59.748	51.5601	55.8717	49.397	58.95	48.0821	64.9047	34.7522	55.3894	61.8064	53.245	52.5467	47.9149	61.3012	49.1075	38.0387	67.9775	79.5867	51.9112	77.5756	57.2196	65.5473	51.7443	54.8088	72.0949	48.8701	57.7039	40.4494
68	75.2057	70.082	81.4951	69.8305	94.3673	79.9215	71.6284	94.9658	62.8933	68.4808	67.9432	66.1826	52.6303	61.0738	41.9641	64.4405	75.79	76.9249	72.9306	68.0488	63.4945	59.787	52.3657	56.8531	52.2891	58.0917	49.1441	66.3279	35.2075	54.8616	61.717	52.5444	55.2785	51.4904	64.15	50.2743	37.2022	67.3888	80.8132	52.3758	78.398	58.071	66.6555	53.9505	54.5731	72.7545	48.8526	58.973	40.0232
71	72.8669	70.8162	82.4313	70.9142	95.5967	79.6027	72.8926	97.7466	68.3713	75.7317	67.9105	62.1856	54.3989	59.8787	42.7927	62.3661	75.3498	79.4378	73.3218	67.7716	67.0698	60.9732	52.9698	57.6868	54.6713	59.6408	49.4431	65.8248	35.8773	56.8332	58.3949	60.524	54.1535	49.7502	64.2235	47.7683	39.6341	63.997	78.5027	53.107	80.4129	59.3015	66.1741	53.4887	55.5048	75.6621	50.4028	60.5538	40.2997
74	76.9352	71.5187	83.5041	71.8665	95.6708	80.8799	72.3805	95.0324	71.2074	77.1311	68.0792	66.926	55.6065	61.0503	41.6505	61.7063	79.048	77.0598	74.5491	67.86	65.4728	60.9052	53.615	57.3025	55.7273	59.7394	50.6221	67.6798	36.0751	57.4381	60.5695	60.0246	55.8087	49.5288	64.0921	51.5818	40.7458	67.8643	77.8167	53.1948	79.4099	60.5925	66.5464	55.6724	58.072	79.2217	48.6206	62.063	40.2123
77	73.176	71.9717	83.3886	71.5245	96.7589	80.1263	74.8133	93.3584	73.7459	77.909	68.1349	67.0875	56.6399	60.2206	42.4748	64.6634	81.7781	76.4546	72.3293	65.8121	68.2066	60.444	55.1055	57.8278	56.5607	60.6129	52.1079	67.8361	35.8835	58.5972	55.7368	62.2544	59.0816	50.7653	63.81	51.4027	41.0341	67.3669	83.3911	55.9678	79.2448	61.4974	66.454	57.4025	59.3225	83.1849	48.7239	61.8337	40.8946
80	74.2073	71.9776	82.3099	72.4373	93.6406	84.3518	77.9895	92.7809	70.7376	77.7949	68.9071	69.652	56.337	62.2582	43.7038	63.6423	81.1533	79.9389	73.444	67.9333	68.5849	62.0025	54.2298	57.3736	57.4806	63.0276	51.7724	68.1814	36.0798	57.7875	62.3989	59.4733	61.0978	52.2584	65.7051	53.3485	42.2322	70.7049	85.0808	56.3491	79.1454	61.989	64.7356	58.8237	59.4245	80.4654	49.9483	61.6168	41.3684
83	73.5131	73.5318	84.6984	72.8692	96.0928	84.1127	77.346	94.1325	70.1493	79.0128	67.7646	66.3113	58.3102	61.8957	42.6983	67.4712	78.6144	81.5788	73.6784	68.6716	70.4273	61.7808	55.8726	58.4286	59.1217	64.1894	51.7099	70.2497	36.5069	56.7183	58.8796	59.9354	61.3448	53.2599	66.2266	53.6594	39.4404	66.7231	88.3764	57.5517	81.4382	63.1859	66.5006	58.4206	60.5068	78.8856	50.565	62.7887	43.1534
87	74.8044	72.2572	88.8902	74.048	94.9091	85.3693	75.3279	99.8136	72.6305	80.3951	67.8098	67.8645	58.994	62.5013	43.2059	65.9549	78.2507	84.3177	74.9328	68.7534	71.0315	61.9901	55.1846	59.6178	58.6312	63.4239	52.1514	68.8854	36.8813	58.2372	63.7763	63.23	61.703	55.7277	69.1493	54.8541	39.9142	73.1394	88.0439	60.1871	81.8186	63.3236	73.8429	57.7715	62.2355	74.5609	50.677	63.8018	42.66
89	78.7439	72.0652	88.339	73.9707	97.4828	88.6512	79.2747	98.785	71.081	81.3434	69.0822	67.3798	58.4157	63.6968	43.5869	66.317	79.1409	87.5121	74.2451	69.5809	71.194	62.0782	55.2415	60.0976	60.0473	64.3298	52.4347	70.2602	37.8979	58.878	61.8997	60.6587	61.0004	54.7597	68.2606	57.798	41.3997	77.7277	86.1303	61.7709	85.3428	64.6956	69.1546	58.3734	62.0628	79.762	50.9734	66.4523	42.1228
92	79.3262	71.3731	88.8267	74.373	99.628	86.6211	79.2575	101.611	73.0154	80.7359	69.6586	70.6512	58.967	62.1574	43.8959	68.9714	77.7119	86.2442	73.3697	70.1994	71.7064	62.5796	55.5923	59.3299	60.5152	65.9785	52.501	72.4288	38.0044	60.8233	59.8229	62.1309	60.8984	56.492	69.2522	57.1689	43.0467	77.7842	90.2119	65.2574	86.0978	66.6769	66.697	59.8419	64.4729	85.1452	51.9864	64.5276	41.5061
95	74.7247	70.3725	89.13	73.9588	100.674	86.3909	78.7038	99.394	71.4209	82.7464	67.4064	70.1395	59.9475	62.4848	43.6948	70.8721	75.965	85.5299	74.6635	73.2131	71.8308	63.7306	57.7714	60.3125	60.329	66.2275	52.6184	71.3577	38.4094	63.3264	59.6555	61.6717	64.3031	57.0258	69.9246	57.7283	40.4788	73.78	88.7053	62.6289	86.0642	69.0691	67.8491	60.3753	65.2263	86.4681	53.4618	65.7544	41.8479
98	75.12	71.9883	90.7174	76.3607	101.291	88.7312	74.1551	100.57	72.2717	74.3926	69.017	70.5146	59.7705	61.4217	43.2214	69.7334	81.1901	86.0599	76.2207	73.3991	72.1172	62.9059	57.7467	60.2423	61.3717	66.2399	52.4013	72.8579	39.3544	62.5051	61.3268	66.838	60.5607	58.3639	69.594	62.8144	41.0357	78.8123	94.8861	64.7343	86.3297	69.3516	68.6419	60.2925	64.8332	84.9727	53.1328	65.8696	42.5433
101	74.5783	71.5719	89.3719	76.6965	102.081	90.2614	80.3139	101.138	73.9989	82.5796	68.4862	69.5669	59.8197	63.6453	43.0962	68.7563	80.412	88.7	72.3807	73.9647	75.0216	64.4627	58.8583	61.2063	61.5361	68.242	51.5098	74.6434	38.3266	63.334	58.553	66.2019	63.2099	58.8091	70.535	56.4808	40.3444	77.7916	90.4136	64.7732	83.3493	68.2877	72.2976	59.8181	65.9661	89.7064	54.4773	65.9539	42.5968
104	76.0496	70.7643	89.5846	77.3702	103.28	87.3121	83.6528	99.4179	70.7835	75.4699	69.2953	70.1558	60.4118	64.1452	41.7364	71.0061	84.877	87.6423	72.3178	72.9076	73.7845	65.3844	59.3155	61.0256	63.2326	69.3212	52.5665	74.1243	39.3655	65.2437	62.3777	64.3277	61.629	50.4319	71.5574	60.813	44.5375	80.2147	89.6569	64.6632	88.8054	69.6953	71.8607	59.3045	66.7184	88.2193	54.5121	66.8216	42.9201
107	78.5379	70.4564	89.2964	78.0448	103.208	88.5203	79.5906	100.924	69.2787	85.1403	70.2999	70.7512	60.8805	67.1984	40.7392	70.4037	85.7606	87.4891	72.8611	74.2721	76.653	65.9241	58.9179	61.3645	63.2482	68.6074	52.8755	74.4305	38.7833	64.2109	59.0145	66.5635	61.9061	47.2061	70.6055	58.8449	47.474	78.2238	87.972	64.8783	84.8523	71.993	67.3038	58.7106	66.331	88.8161	55.125	66.1026	42.4224
110	76.7836	72.4706	91.6524	78.076	102.711	89.6762	80.1112	102.538	62.8162	85.7314	69.5995	67.7908	60.3504	63.5883	40.1399	71.287	87.6361	90.1285	75.053	73.0159	76.0148	65.5475	59.5139	62.3731	60.4945	66.091	52.6032	75.2669	39.352	61.1975	58.1691	65.0435	62.5121	49.3909	71.5528	61.439	46.0673	79.5519	94.2578	67.9586	88.197	74.2954	66.6021	59.2787	65.9797	91.0512	56.2861	67.3506	42.6617
113	76.8446	71.5132	96.3281	77.0314	103.69	89.3972	76.6394	106.12	66.1224	87.6597	68.8562	69.1089	62.4512	64.0523	39.6791	72.6457	84.7018	90.2434	74.264	74.2081	71.906	65.2263	62.9267	61.7131	63.5025	67.0234	52.8657	74.8579	39.7128	62.434	62.1392	69.1557	63.8202	51.3274	72.6674	61.7369	45.4639	82.0468	96.4245	66.7275	89.0429	74.3011	69.8671	58.614	66.3436	91.4342	54.5777	65.1595	41.75
116	75.9832	71.6311	93.3301	78.1173	105.306	89.4121	79.594	109.238	66.3549	86.7686	69.6927	70.186	64.493	64.7648	38.2201	72.4583	85.2602	92.6838	71.971	74.6267	74.9121	66.1199	63.7103	61.0565	64.5046	69.5578	52.7717	76.6806	41.0291	63.0418	58.6333	74.0952	61.3556	50.5265	71.9995	61.3816	44.7517	86.6149	93.6233	68.8344	91.191	75.7755	71.3875	58.2689	66.4077	90.0468	54.8418	66.1134	42.8509
119	74.3787	71.5092	95.0941	78.6696	108.251	91.3197	79.8244	108.217	70.8728	90.98	67.3001	72.024	64.1954	65.1199	38.9952	74.8934	91.35	91.3581	75.1972	72.7191	74.3578	68.7183	64.5388	61.7791	63.5215	69.1507	52.7403	76.0782	42.0078	64.7748	58.468	71.603	63.4814	50.6278	71.8628	59.3196	46.4376	86.5206	93.6728	68.3161	93.4358	75.9973	70.4905	58.8952	67.5686	87.5151	56.7009	69.5088	42.8362
122	74.9108	70.1192	93.163	79.8405	106.934	85.2769	81.003	106.569	69.2025	86.8763	67.7995	75.4685	66.8717	65.0635	36.9396	73.4759	94.345	91.0067	76.4547	73.0389	77.0064	69.1059	65.2752	62.103	61.4006	72.66	54.2078	77.2016	41.1915	64.1025	59.0753	71.4559	64.5391	54.7108	74.1722	65.9339	45.1131	86.3124	92.1767	69.2041	90.5582	77.1188	74.8245	59.6984	69.0323	90.3351	56.9723	69.355	42.9169
125	74.6816	70.2494	92.7849	79.9465	108.559	87.9389	78.5068	106.475	62.01	88.7259	68.4668	72.3149	68.5166	67.9717	38.0158	71.0436	88.7955	91.5923	74.3137	73.189	74.6491	69.2343	64.6379	62.5599	62.6767	71.4988	53.2404	77.347	41.7281	63.8464	58.4326	71.4166	68.0746	54.1688	74.3264	62.0849	46.9472	88.8031	88.7416	67.7577	90.9963	78.1582	71.079	59.895	69.2887	85.4059	56.7017	70.8142	42.5825
128	73.1044	70.7865	99.1399	79.2946	109.436	89.1053	75.3464	102.646	64.8106	88.3282	68.4977	70.3886	67.6751	67.6686	37.4184	71.4565	86.8352	92.9013	74.0672	74.2019	76.3662	70.7589	65.3991	63.9865	62.2453	74.9515	53.507	78.1126	41.9303	66.4341	57.8897	67.9579	63.7281	50.7779	74.551	64.8637	47.6503	86.9677	87.1163	67.453	89.1954	79.2175	70.1653	60.2809	70.4022	88.205	57.3146	72.4902	43.0388
131	74.4502	70.6013	94.3205	81.0031	110.53	91.1505	79.928	105.082	64.4272	87.2157	69.306	69.2683	69.2679	65.5573	37.153	72.4937	88.6244	94.6774	74.6938	73.3724	77.2536	70.3155	67.4961	63.1947	65.1208	74.2301	53.66	76.9861	43.2453	67.2429	59.3886	68.0426	64.7973	56.8744	75.3284	66.3053	47.6882	89.0246	91.9382	72.6584	86.3026	80.9506	69.9787	62.5357	69.741	87.8384	58.5868	72.4141	43.2899
134	73.8551	70.951	95.1098	79.0152	109.265	91.0983	80.9767	104.917	73.8204	91.2253	68.7395	71.6852	67.5223	65.0079	37.5452	72.3834	91.2618	91.9753	76.4986	72.1115	78.3092	70.5055	68.4504	63.3168	65.6594	71.6288	54.0127	77.7205	44.6053	69.3303	59.5712	70.7764	67.5116	55.461	75.6863	67.0334	47.2302	94.8749	99.7754	73.3424	86.7295	82.281	70.6496	64.2061	70.2243	90.938	58.41	71.2202	42.9201
137	76.3581	69.1761	94.3323	80.6902	108.49	91.8606	84.3298	103.353	77.0139	88.7965	69.5439	72.2633	67.9292	66.3826	38.2708	73.9951	90.6995	94.4849	78.5503	74.9301	75.5429	69.1099	68.1002	63.9746	65.5448	71.7383	56.6833	80.1773	44.8778	69.2209	57.84	72.8475	67.8004	55.2186	75.5078	68.1452	49.8979	96.0839	93.3389	72.672	93.7027	82.8973	72.9048	64.2942	72.535	91.7609	59.2238	71.6737	43.4016
140	77.7313	67.8335	94.3003	80.2676	109.208	91.7637	84.1812	103.307	81.6953	89.1046	70.7188	74.6051	68.7853	66.4208	37.0745	72.0716	90.047	92.3334	77.5697	76.278	75.4409	70.4169	71.4216	66.7667	63.5224	73.0233	56.0167	80.7751	45.0147	68.1359	56.2266	70.4709	69.9066	57.3123	75.5583	70.4434	48.3216	99.8791	100.888	72.1462	86.1569	82.5249	76.4586	65.1689	70.4792	93.0952	57.7846	71.881	43.0596
143	76.2407	70.2795	93.5049	79.1726	109.095	91.9615	85.1717	108.381	78.8209	92.1741	68.7044	72.0767	68.7133	66.1863	37.1216	71.0521	89.1271	97.2836	78.0775	75.3134	76.8321	70.5555	68.2939	66.9903	65.3458	74.7744	56.5154	79.0861	44.9972	69.4213	59.6225	71.996	72.046	59.9911	76.7138	67.8505	48.5773	98.5992	99.8587	70.9347	88.5694	84.4931	79.2073	65.0665	71.7003	92.0171	57.8667	71.243	43.1227
146	74.7832	69.606	94.7034	80.7806	110.176	91.4967	85.5781	104.728	81.1932	89.9963	69.5382	71.1279	66.9579	73.9248	35.8935	72.8786	92.6699	95.725	78.9597	77.7871	78.8624	70.3195	70.8939	64.5803	66.3244	75.9563	57.1728	80.9487	45.3126	69.1149	58.0921	71.9978	67.6129	64.938	76.3308	57.6458	49.1962	102.54	93.2822	73.9863	88.1253	84.8277	80.9744	65.4322	70.8623	91.1917	58.632	71.7176	42.6695
149	76.1348	70.0343	96.5755	79.5969	108.581	92.4398	88.1634	105.655	77.4661	87.9288	69.7356	74.8599	69.3663	74.0198	36.7476	74.8694	92.734	94.7599	80.5408	79.3168	79.932	71.3495	70.8101	68.4846	65.3332	76.2271	57.9305	82.471	44.482	69.3881	58.3443	72.6121	70.3334	64.8311	76.0075	68.0223	48.8573	99.8636	92.1097	74.5081	89.4161	86.9316	80.6763	64.6292	73.3137	94.1929	59.9754	71.8509	42.0318
152	76.4167	70.016	94.5801	81.4555	107.571	93.6492	88.1126	107.877	85.2979	90.4465	70.7113	73.1167	68.0699	74.1363	36.2027	77.7109	93.0386	95.9458	80.5044	78.6749	80.1571	71.332	69.6304	70.709	67.02	75.0451	57.8133	82.988	45.6375	67.8956	54.9896	75.1355	70.8005	63.1813	76.0002	67.5556	50.5587	100.357	95.8291	77.7275	86.5207	86.5759	80.338	65.3076	73.3036	95.4405	60.0975	71.2054	42.366
155	77.1051	70.2743	92.8235	80.2774	108.3	93.6816	89.791	105.722	86.0116	92.0119	71.2519	77.2122	70.8642	75.9488	34.8336	78.0216	92.8068	95.5922	79.8165	74.6638	80.6134	71.6139	72.0734	69.1794	68.4767	76.1847	57.9733	81.8641	46.057	67.0011	55.9337	76.4196	71.5729	58.5726	78.7552	66.7237	51.6394	95.7752	93.2022	79.331	86.6635	89.6401	82.4973	65.5589	73.4179	92.0869	58.6297	71.8919	43.4673
158	77.4044	70.9226	95.4451	79.8288	111.102	92.075	87.1181	108.388	88.3681	94.1627	70.2243	79.2064	72.0602	71.05	34.0973	77.8946	96.6625	94.7629	81.6228	73.5805	79.2263	70.2894	73.1726	69.273	69.5932	77.9647	57.55	81.3364	46.0904	68.489	54.828	69.6439	70.6012	61.0916	78.2548	65.1602	50.1142	102.337	94.3418	80.4465	87.2268	91.4262	81.411	67.4326	73.9054	95.0842	57.2456	69.7166	42.8249
161	76.6363	69.8151	92.8058	81.1425	107.831	94.3681	87.0204	107.369	85.028	92.5495	68.5025	82.9059	70.7031	69.6274	34.5757	79.8852	94.5934	92.5163	80.47	73.5485	79.8676	68.6874	74.1421	66.3552	67.4606	77.3894	59.2455	81.5184	45.5168	68.3018	57.9275	74.1759	76.4616	63.5839	78.2866	69.2951	53.5432	103.131	89.7064	80.8962	92.1371	91.1215	82.4843	66.6839	73.243	98.8038	56.3941	71.6038	42.7048
164	76.0522	68.7042	95.5577	82.8685	110.494	93.7789	85.439	106.519	90.3655	91.9463	71.3011	82.3675	67.9937	71.7351	34.3544	77.3276	92.7849	94.3565	80.8687	73.551	80.9139	69.0006	78.5273	64.0358	70.0117	77.9973	58.7881	79.6006	45.6918	66.1913	60.0773	74.0559	75.5097	61.4656	77.8053	68.0131	52.1087	98.3598	97.1667	84.565	95.7012	90.3187	82.0226	64.1323	75.5527	91.1764	57.4847	71.7838	42.6849
168	75.7139	68.868	99.4412	83.3684	108.813	91.6289	84.7435	106.422	89.3209	89.7898	70.659	79.4554	68.5867	69.2495	35.0817	77.5973	95.7773	93.3752	82.3679	74.5469	82.3818	70.48	74.2793	69.4929	69.7131	77.0427	59.7738	81.4487	46.6181	67.2644	59.8756	77.2985	75.9815	60.8898	78.437	73.3837	51.9964	100.504	90.7584	81.7377	94.7833	90.3041	80.8048	68.7064	73.4556	90.6497	58.0744	71.6453	42.6639
170	74.4815	69.7307	99.0729	83.4614	110.533	92.5056	87.0626	107.908	90.1854	90.5907	70.6569	80.0406	66.7497	72.6049	36.5942	76.7374	95.0313	94.7597	80.2174	72.5422	86.0388	69.6217	79.3408	66.8178	70.4858	77.6025	59.7497	83.4642	46.8304	67.384	62.1795	78.3214	76.4159	68.6422	80.2301	72.9605	53.3435	99.3671	89.6391	81.2879	91.5884	90.6305	81.0797	69.52	76.3033	94.7388	58.7777	70.7336	41.662
173	75.1146	68.7107	99.3579	83.584	109.846	91.2982	88.0078	107.605	93.3794	93.3576	71.2001	79.0241	69.1229	73.8845	36.3665	80.2181	99.1697	96.8859	80.5029	73.2985	83.1688	67.6677	80.0057	66.5633	73.2054	78.3758	60.8076	80.7066	47.9956	70.9238	58.9984	83.6582	72.9177	69.3772	79.7983	74.7713	54.4754	107.769	96.1549	82.5377	96.8708	89.1915	83.5098	67.6839	76.7172	94.0457	59.9537	69.6294	41.374
176	76.2285	67.5364	101.255	82.6505	110.292	90.9911	87.2197	109.866	91.158	89.3285	70.7004	79.2914	70.6129	74.9933	37.0054	80.2332	105.075	96.6541	80.5674	73.2985	82.5417	70.7923	78.8553	64.947	71.684	79.4184	61.1116	81.5022	45.8421	72.0506	60.0594	80.7488	77.0842	68.7373	79.9483	76.4863	52.3242	110.72	102.171	86.7089	93.6027	91.4371	84.9284	66.4114	74.5811	95.4354	57.5546	73.031	41.2166
179	77.4615	66.8123	100.071	81.9583	109.595	89.4949	87.8512	112.438	91.886	96.3511	69.6416	80.4824	71.6372	73.5195	36.7008	77.2995	102.381	96.16	82.1088	71.0192	83.8137	71.943	81.201	64.0135	68.7656	78.4794	60.1844	81.5174	47.0184	69.5518	57.8978	83.3925	76.6957	73.2557	79.5447	74.1099	54.1217	102.877	95.0251	85.8836	92.0221	90.1105	79.4971	67.4954	75.8423	103.678	57.6369	71.2357	40.5958
182	77.8901	65.5714	101.489	82.5798	108.093	93.6185	88.0398	111.723	89.918	98.7189	71.6446	76.518	70.5986	74.6138	37.3204	80.0476	103.812	95.1906	82.2438	72.5126	85.45	73.729	80.4817	66.5025	68.3372	76.9689	60.6873	83.1511	47.8626	65.0881	56.4978	84.0437	77.3454	74.0524	82.0021	71.2027	54.9594	111.68	91.7886	85.1843	97.7653	89.4668	79.1152	67.6152	77.4546	105.417	57.0108	73.7211	41.3378
185	76.4792	65.8127	107.351	83.17	106.576	92.1623	86.4814	112.547	91.0682	100.432	71.7455	79.9206	71.407	77.1206	38.4064	82.0085	107.376	94.8693	80.6781	72.7057	85.4228	74.8413	81.2979	65.3932	72.7396	77.4497	59.4401	82.4315	47.6048	67.1943	56.291	82.248	76.5583	73.7485	81.3795	70.4592	52.8367	114.3	90.6917	86.218	93.3367	90.7781	85.0474	69.0744	77.6689	109.037	55.6494	73.5667	41.2367
188	76.1426	65.3138	103.727	83.687	105.502	97.0481	89.2146	110.646	95.3935	105.476	73.1096	79.7802	72.0268	76.686	37.2591	82.3731	107.82	92.6175	78.575	74.1325	83.9109	73.4283	77.8208	64.7325	72.3241	76.8207	60.1956	81.9256	46.7441	68.592	57.229	78.0562	76.539	75.1798	81.3923	75.3028	54.0851	118.393	92.0093	89.0041	95.7429	92.1844	83.6851	68.1894	79.6432	108.85	57.3478	73.0405	42.484
191	74.0854	66.6285	103.994	84.9344	107.745	91.8897	87.5052	112.859	97.4298	103.047	72.923	82.8953	73.7192	77.7045	39.9407	82.2135	109.409	92.4168	80.7078	73.8151	85.2197	75.2381	82.0575	65.5829	73.0487	77.3209	59.7543	82.7175	47.6041	65.4071	57.8165	78.315	77.7803	71.75	82.0251	72.8128	54.9073	108.593	92.1036	87.6357	95.1382	92.523	84.5558	68.4534	80.0839	107.403	56.3931	74.8874	42.8734
194	74.605	66.6805	102.126	83.6547	105.889	92.4963	86.1651	111.644	110.214	106.987	69.6821	81.5855	74.0888	77.027	40.9943	83.3219	111.179	92.2515	81.7901	75.8365	85.989	72.7962	80.6171	64.4444	76.3634	76.9429	59.6256	82.2143	47.4196	64.3819	60.6273	73.7112	81.9954	73.4088	84.2724	70.3362	53.9896	113.324	98.9102	89.7895	92.9071	93.1294	86.0131	68.8857	82.403	113.862	56.9434	74.0206	43.9387
197	75.7312	64.7608	104.477	83.4627	106.237	93.9175	86.6294	112.161	105.232	104.568	70.5624	83.7567	74.2759	78.3911	41.4615	83.8131	113.49	93.0237	82.2974	78.5703	86.9059	70.909	82.7168	64.9607	74.4859	75.7081	57.8742	82.8897	48.3984	64.9801	57.7046	76.1096	83.0383	73.8946	83.8783	75.653	53.9064	116.498	96.2621	89.0383	95.0992	90.7395	83.3058	69.3563	83.0969	111.956	56.911	75.9466	41.9314
200	72.9705	63.8832	105.116	83.5983	104.913	90.8022	85.97	114.291	103.197	107.873	70.781	83.5049	74.5472	77.781	42.2474	81.164	114.589	91.7868	81.2649	74.7556	88.9331	74.3845	80.5377	65.5705	71.6647	76.9378	57.3836	83.5058	48.3748	63.0743	58.0656	82.9526	83.3359	73.017	82.6921	72.8231	55.3789	117.989	98.7619	91.6105	92.58	89.9452	85.7174	67.4567	83.9487	99.6475	57.6127	74.6632	41.9887
203	77.4955	65.1309	107.235	83.9523	108.527	89.6194	84.5788	113.681	105.282	108.162	69.842	83.4454	70.0869	77.8296	42.9891	84.2768	118.733	89.9842	81.0844	79.7931	89.7562	73.3676	82.1763	65.563	76.2626	77.2307	58.5528	81.9331	47.762	65.9396	58.6679	84.1683	82.6547	75.1911	84.4312	67.5495	57.5011	118.299	94.3192	90.5557	95.2922	90.2388	85.9778	70.2599	81.5452	97.4001	57.323	74.8019	41.9092
206	76.4612	64.001	108.036	83.8275	106.152	90.0242	80.7825	113.372	108.193	106.511	70.4366	82.5178	70.9712	78.3958	43.8233	84.166	119.58	93.2336	82.1015	78.7852	88.1429	74.0186	79.5764	66.9081	74.8882	76.1389	59.3757	84.6186	49.0752	67.8919	60.2947	77.0928	83.6669	74.9733	82.873	68.8444	57.0864	115.544	87.4075	91.1587	94.9702	90.4106	84.0482	69.5671	80.4509	104.584	58.0992	75.3646	42.6503
209	77.5472	63.5223	108.089	84.2091	109.064	93.1581	80.6543	116.104	100.773	106.923	68.5084	85.7547	72.3509	79.5085	43.7881	84.5686	121.121	96.1138	82.0099	76.8999	89.9753	73.4274	81.698	68.7742	74.9723	78.5211	58.4404	84.8458	48.7672	69.5944	57.1814	79.0659	83.969	74.7158	83.7129	66.5493	59.2707	122.126	89.8215	98.3163	94.2284	91.3572	84.3959	69.3164	83.5817	101.335	56.7208	74.5377	44.2154
212	76.6822	63.6786	108.15	82.1658	109.108	91.7238	83.4835	113.263	100.707	105.461	69.1273	85.0147	72.4332	79.1997	42.7353	85.1218	120.714	95.3235	79.6745	77.1855	91.3462	73.0547	85.7769	67.0276	73.4839	77.2318	59.1788	81.5562	49.0963	70.4356	58.402	78.8563	87.2536	76.8002	83.9945	68.1528	58.2255	117.665	84.6208	94.8431	95.5973	90.3302	84.3946	69.8975	82.2211	112.356	56.4937	76.0151	42.703
215	76.8988	63.6918	109.805	83.5501	108.094	90.3589	87.3795	113.99	105.733	100.823	69.3435	81.9813	71.7103	81.3129	43.5002	85.1218	116.781	98.5986	80.9971	75.0518	90.9478	73.5218	84.8058	67.4065	71.2375	77.758	59.4171	83.2439	50.2047	70.67	59.2758	76.6494	85.5614	75.9256	84.2633	70.0573	59.6534	125.731	85.3141	94.1819	98.3096	88.8162	80.4454	68.7637	83.7668	112.803	56.8137	73.7836	41.6272
218	78.1937	62.9738	104.873	83.489	107.582	89.8705	90.6466	113.194	105.266	101.605	68.7276	83.3027	71.8466	80.8977	44.1502	85.1011	115.918	98.4109	77.539	76.0704	89.3244	70.517	84.268	68.1121	73.5358	77.548	58.7466	81.7786	49.8845	69.9381	57.9292	83.4727	87.8327	74.1624	84.7847	71.1831	60.4138	121.41	86.9448	92.2293	99.5927	89.8452	79.608	70.0037	82.4857	98.7064	57.1924	75.3542	42.5054
221	78.3816	61.0487	105.157	84.2193	108.174	92.5459	86.8467	113.966	104.156	103.54	67.9669	84.2513	73.3186	84.201	45.033	83.3096	116.379	94.5435	80.6127	76.0004	95.1112	72.9741	87.9986	68.6212	75.1326	78.2788	57.8064	82.8937	50.0332	68.8847	58.5621	83.5665	85.755	72.8655	84.4216	63.1061	60.1844	120.237	91.1332	95.4646	99.9118	89.9156	82.6429	68.0699	83.4056	110.779	56.0629	75.6666	42.5349
224	78.3157	62.0628	103.572	82.8763	108.616	90.1439	86.0326	113.098	107.826	103.847	68.1709	80.5438	74.9808	81.0625	47.1901	85.0854	114.038	97.5678	78.0743	76.2405	91.1872	72.0986	85.2089	70.0351	74.3335	78.1739	57.7502	83.4641	50.5666	69.2908	63.1786	86.3782	88.8307	71.6303	83.8161	65.1002	57.9224	120.299	94.1684	95.4213	101.067	88.0162	86.8875	69.6927	83.6548	110.26	56.9329	76.5031	41.9145
227	77.7392	59.3691	102.939	83.3378	110.697	88.4988	85.7655	113.427	109.036	105.918	69.8596	85.0923	72.8945	81.2584	46.6653	86.8361	117.567	95.6031	79.8679	74.4429	97.5516	73.0285	85.1725	69.772	74.3192	76.5509	56.8868	84.5048	50.2526	69.7394	59.0715	85.2124	90.4929	74.0793	85.0411	73.6089	60.0248	124.782	94.5955	96.9165	98.1513	89.3762	85.665	67.8798	84.9417	112.714	56.1725	78.5148	41.4896
230	75.0399	60.5083	105.975	82.3766	111.909	91.7731	88.7901	114.039	107.286	104.026	68.9672	86.6923	73.2088	79.95	46.3876	87.3155	117.69	96.7222	78.5844	74.5855	96.018	73.6649	87.2217	71.5721	74.716	76.3846	56.3536	85.0389	50.9397	69.2734	60.0384	85.0792	88.8012	73.668	86.6441	74.3894	58.0329	128.704	90.3716	97.8864	98.2001	87.0439	89.5457	66.5805	87.146	120.191	55.9943	77.9804	41.6413
233	77.8185	61.834	103.434	82.6965	107.102	94.4003	87.0079	112.577	106.89	103.597	70.774	85.5753	73.6251	81.2732	47.6551	87.4267	118.113	97.1631	81.7316	74.8425	96.7928	74.7924	84.0804	71.6689	77.7675	80.5021	56.0689	87.2828	51.3266	68.3106	57.427	79.737	89.9476	74.9485	84.9318	69.4	57.2802	117.446	92.9368	100.805	97.118	88.083	89.6528	64.6082	89.3179	118.235	55.4492	77.0421	42.0155
236	75.2786	60.9599	108.678	82.0904	109.401	87.4604	87.826	115.007	106.764	105.532	69.3994	84.1989	72.8464	82.1536	47.6009	87.6871	116.45	96.335	78.0375	75.0435	96.1962	74.5154	87.3629	71.7829	76.3075	81.0758	56.3216	88.7556	51.3121	68.9181	58.1768	83.162	90.7018	76.8046	86.3478	70.5142	56.6654	121.868	88.8665	103.963	96.6831	85.7429	93.0303	66.8544	86.8582	117.478	55.0141	76.0931	42.0675
239	76.111	60.4762	108.218	81.5593	109.092	87.8176	86.892	117.985	102.698	105.583	68.7639	81.5983	70.8319	82.1773	51.5445	89.159	121.462	95.8711	79.5067	73.2236	96.9833	72.6404	87.0485	72.4919	76.2024	79.68	56.4401	86.1472	50.5647	70.8209	60.0367	88.4392	90.9387	77.1517	88.1837	72.5881	60.524	120.987	93.7998	102.386	99.2296	88.2201	86.1967	66.6405	88.7326	118.15	57.2187	75.7147	42.0382
242	78.3336	59.4007	108.997	82.4364	106.858	88.2029	88.296	120.352	100.49	107.31	68.9247	83.5746	73.3805	81.1247	51.2931	89.2438	126.529	98.4619	79.1578	74.9184	94.515	74.4511	86.5672	72.1141	77.094	79.6812	56.3101	84.0824	50.9496	68.7063	61.0912	83.0941	95.1924	77.3846	85.8487	72.0645	57.3366	122.228	91.4676	104.141	97.6661	89.2094	85.9349	67.7872	91.4135	117.305	57.763	76.1972	40.4059
245	77.4453	59.9649	109.132	82.8576	105.766	92.2648	86.6657	118.673	101.536	111.339	69.761	84.0164	73.9254	82.3067	52.3155	89.4445	126.346	98.2504	81.114	75.9309	97.5224	73.385	91.6869	72.2187	78.2966	79.2038	57.2291	86.6059	52.0561	72.8726	58.7139	82.6202	97.6026	77.641	87.0426	70.6029	59.7373	123.698	91.2011	104.261	96.2382	90.1856	86.83	69.3919	91.0198	114.154	57.6968	77.142	41.8256
249	75.85	59.7378	113.384	81.7802	104.087	93.0773	89.9473	120.574	102.229	109.452	68.6826	82.8987	73.0316	82.7138	54.3969	88.778	121.263	101.864	80.152	78.1291	99.8571	73.7897	90.0846	72.6367	76.9248	77.749	57.7392	84.7523	51.6392	72.6503	57.6877	86.1733	96.6552	77.5728	86.537	76.3723	59.2783	108.859	94.6014	102.842	99.4771	90.2353	84.3824	68.1067	91.6878	114.53	57.7517	77.2989	42.1744
251	75.8748	59.3482	111.938	81.3243	106.427	94.7228	86.5486	117.027	104.835	111.265	70.2418	81.378	72.4735	83.2065	55.9876	90.5866	127.567	100.592	80.0535	75.7303	100.605	74.241	91.5928	73.0929	74.4608	78.1445	56.5909	87.2691	51.2647	70.498	58.5606	82.4259	97.4621	76.6617	87.3487	72.4452	59.7737	102.198	95.862	105.001	99.2662	89.8907	86.4527	68.6861	88.6701	114.69	58.261	79.0769	42.9534
254	71.2155	58.7283	109.459	80.6858	106.321	93.2594	85.6964	120.896	105.064	103.729	69.8056	81.7127	74.6988	85.6183	53.957	89.5744	127.19	99.6014	81.9496	76.141	98.1801	74.083	94.151	71.273	78.5619	79.3518	56.1095	83.9037	51.4196	73.8045	58.1708	81.0693	94.3046	77.5408	82.6857	67.6906	60.5943	108.71	89.6499	105.521	100.606	91.4979	83.1927	69.1934	85.5925	112.457	58.8006	77.1719	43.031
257	72.2988	58.6054	112.169	79.7814	107.113	90.5407	85.5209	119.938	105.676	99.892	71.4306	82.5717	73.0022	85.7753	55.9739	91.899	124.6	101.221	80.1825	77.4861	99.4166	75.2565	92.2984	72.8945	79.9314	79.7279	54.8664	84.2463	51.1088	71.8724	58.1016	80.7467	96.5975	77.6837	86.7197	73.6371	60.431	124.913	88.0531	105.448	103.966	92.6438	86.8275	69.106	83.4045	111.298	58.2962	76.4413	43.0589
260	72.9357	58.7171	111.011	79.8611	106.376	89.9165	83.2913	120.83	105.479	103.054	71.9057	81.8401	72.3962	88.2332	58.1999	92.4678	123.134	98.79	81.4526	76.979	98.6997	72.2674	85.9612	72.5172	79.352	80.2655	56.6704	82.6222	51.1292	72.8393	57.5971	79.7981	99.4547	74.7829	86.7048	72.7654	60.498	111.698	90.3813	104.657	102.434	93.9774	86.4878	68.1421	84.361	103.178	57.9928	74.3541	43.0678
263	73.8983	58.7822	112.122	82.2255	110.841	93.8974	86.4848	120.637	106.849	99.1338	74.0341	80.1929	74.0666	85.5879	58.2715	92.3997	124.691	99.0819	82.7017	74.6367	102.963	74.6683	89.9312	71.7736	80.323	80.4756	56.8069	86.9838	52.9346	70.9555	57.4904	78.5195	98.2214	76.1982	87.4975	72.9204	59.5915	124.384	94.2842	109.336	103.068	94.415	84.7699	65.9871	84.3362	104.608	56.8935	74.579	42.4785
266	76.1406	58.7884	111.981	79.8861	107.381	90.5008	86.9972	120.634	107.058	99.9016	73.8444	79.5319	73.2901	88.0581	59.9894	92.4073	121.126	98.6017	84.5635	77.6029	103.658	77.2821	88.9879	71.8618	81.5546	79.2254	56.4406	85.6452	52.7904	69.4515	62.0089	76.3391	98.2372	76.2825	87.8031	74.5445	62.2039	128.234	90.8583	111.433	104.713	95.4654	83.4663	67.1525	83.7287	104.259	57.1267	76.0767	41.3463
269	75.4273	58.9274	110.596	78.0112	106.91	93.9731	89.1094	120.19	107.718	103.978	72.7139	79.467	74.9599	88.5605	60.8669	91.5661	123.704	97.9531	81.6898	78.8928	102.248	76.8277	93.0462	72.5929	83.7821	76.2962	55.3283	87.8251	52.8511	69.786	59.8026	81.0685	99.8992	77.8184	89.96	73.1023	59.1842	127.028	95.92	109.786	107.276	97.3787	86.2271	68.1322	86.2007	119.687	56.9419	76.5736	43.152
272	76.3261	58.2017	108.963	77.6906	109.453	94.9405	90.3014	121.365	106.117	109.278	72.0024	82.8642	75.7139	86.6182	59.683	92.1582	125.45	95.9672	85.9257	81.0996	103.648	75.2021	89.001	71.2615	81.2955	79.3365	55.2209	88.3979	52.664	72.7487	60.2018	82.4556	97.3047	78.4564	89.2555	74.9712	60.4618	124.479	101.835	107.889	105.865	97.3962	86.6316	70.141	85.2627	117.96	57.6151	76.5151	41.0584
275	75.7602	56.7388	108.016	77.763	110.291	96.2995	90.3102	117.507	111.232	111.56	74.0684	85.8098	75.2339	86.9175	60.6149	92.3255	124.997	96.781	84.9053	78.6662	103.059	74.8081	90.0329	74.3003	81.9726	77.6733	54.8851	85.4903	52.8731	74.4559	58.3563	80.4874	100.35	77.9681	89.0629	78.7624	61.6119	125.475	96.0341	110.877	102.249	100.425	84.0212	71.6611	86.2964	114.259	56.7398	76.0132	41.7455
278	76.2489	57.3468	112.344	78.2793	108.553	94.7796	92.7275	120.137	111.675	110.559	72.8791	87.3576	75.5574	86.4715	63.6017	94.7132	126.938	97.672	83.4092	79.5775	106.991	73.6372	91.5436	73.7535	77.3424	76.602	54.0725	87.4311	52.6965	76.0277	59.6597	82.9047	100.227	77.0923	87.9149	76.9786	62.0375	123.948	97.1476	111.047	104.724	102.887	89.4211	69.0417	86.1036	107.188	57.0235	77.0674	41.7747
281	76.4754	56.6194	109.621	78.1197	109.966	92.9268	89.0178	122.104	110.965	109.975	74.6432	87.8243	74.5226	84.8552	66.5409	94.36	127.396	96.2506	85.3468	79.2874	109.763	72.4258	87.7995	75.417	77.7712	78.8012	54.324	83.1876	52.1578	76.0674	59.4686	80.7048	101.39	75.2345	87.5472	79.69	60.7556	128.497	90.9658	108.985	102.365	104.242	89.3829	70.054	83.947	108.516	54.7974	77.6787	40.6682
284	77.3584	55.8749	115.765	77.1182	112.694	97.5391	87.6444	120.524	108.363	109.602	74.3679	87.2541	74.1346		64.6866	91.4261	124.463	97.5571	87.4205	77.5424	106.435	71.6155	88.2822	75.1185	80.1909	78.3619	55.5259	84.9619	52.8483	78.0822	56.4078	77.7794	101.828	74.4219	88.3961	75.1865	63.2178	136.82	83.3208	115.228	102.901	106.072	89.3207	69.8664	85.4749	110.648	55.7917	75.4387	40.2237
287	81.3396	53.8867	111.281	76.335	114.846	96.8307	84.6321	119.719	114.813	106.504	75.668	85.2519	72.3977		70.4635	92.5237	123.043	98.2442	86.8511	77.8329	114.655	70.5969	90.8565	73.9159	79.7225	75.2005	54.5333	83.923	53.9935	78.5212	59.3941	80.2142	99.7009	75.3929	88.5286	75.0833	61.3879	137.076	98.117	118.031	100.669	105.752	82.6482	70.4983	87.3905	111.56	56.5241	77.2242	40.4637
290	81.1771	54.7312	112.26	76.6605	114.653	96.4046	86.8188	120.295	112.911	107.978		88.149	75.5946		71.8716	92.6003	125.296	97.8918	84.4592	82.7548	110.457	71.2379	86.2529	73.4458	80.6375	77.3113	55.9166	83.2925	53.2038	78.4437	60.7183	77.8583	105.169	75.4713	88.6763	78.5525	63.3768	134.25	88.005	118.272	99.7571	103.996	85.1231	71.0382	87.1994	113.498	55.4199	78.4066	39.8635
293	81.0743	53.9911	113.926	75.9882	113.311	99.4253	89.3373	124.992	109.384	108.939		90.2866	76.003		73.9345	93.185	129.105	96.5577	84.607	80.5481	113.279	72.5332	91.7057	75.2267	77.3532	76.793	54.6115	86.3897	51.9448	79.7455	58.5771	81.6013	102.876	74.8263	90.5997	77.8361	62.5661	136.869	92.3085	117.88	99.4991	103.976		69.9646	87.9803	112.059	55.8305	80.492	40.0585
296	81.6843	53.9533	115.577	76.1679	113.767	96.5913	91.1739	120.657	112.175	112.503			74.783		75.5661	94.1082	126.592	97.3897	82.7893	84.043	114.493	72.7289	89.7625	74.5705	79.5991	78.399	55.2561	83.626	52.3453	77.9256	56.2004	82.8017	103.673	73.9207	88.2628	81.1039	65.1123	134.097	86.5737	119.17	97.6197	104.819		68.1718	88.7815	114.249	56.9099	80.7587	41.0562
299	79.156	53.6216	115.769	75.1787	112.634	98.9585	94.6262	122.134	114.17	110.571			74.8931		75.385	93.5333	129.946	97.9079	86.124	82.9846	115.407	72.2596	88.4671	74.8659	79.7132	79.3489	53.6402	84.0065	53.548	78.3693	59.7257	72.5062	112.015	75.3468	88.2247	76.8547	63.3413	134.579	91.8016	121.912	93.3062	105.61		70.6816	86.7151	119.839	58.81	82.5557	41.0131
[truncated: 11 more columns]
