# Supplementary material for: Lipid accumulation controls the balance between surface connection and scission of caveolae
Source: eLife. 2020 May 4;9:e55038. doi: 10.7554/eLife.55038 (PMC7239661; doi:10.7554/eLife.55038)
Supplement: Figure 2—figure supplement 1—source data 1. [file elife-55038-fig2-figsupp1-data1.xlsx]

## Sheet: Panel A
Panel A
Control	Scatterplot Track mean speed vs Track duration
Data set #1		Data set #2		Data set #3		Data set #4		Data set #5
Track duration	Track mean speed	Track duration	Track mean speed	Track duration	Track mean speed	Track duration	Track mean speed	Track duration	Track mean speed
300	0.043	300	0.0598	300	0.025	300	0.028	300	0.022
300	0.046	300	0.0395	300	0.027	300	0.024	300	0.017
300	0.039	300	0.0286	300	0.024	300	0.022	300	0.039
300	0.028	300	0.0404	300	0.03	300	0.018	300	0.019
300	0.042	300	0.0363	300	0.026	300	0.036	300	0.017
300	0.033	300	0.0331	300	0.02	300	0.031	300	0.019
300	0.04	300	0.0391	300	0.024	300	0.032	300	0.014
300	0.03	300	0.0312	300	0.023	300	0.032	300	0.035
300	0.037	300	0.041	300	0.021	300	0.045	300	0.019
300	0.045	300	0.0411	300	0.037	300	0.045	297	0.014
300	0.023	300	0.0271	300	0.02	300	0.025	297	0.027
300	0.028	300	0.0256	300	0.023	300	0.02	297	0.018
300	0.027	300	0.0395	300	0.023	300	0.028	294	0.041
300	0.024	300	0.0518	300	0.042	300	0.03	291	0.037
300	0.03	300	0.0361	300	0.026	300	0.049	273	0.048
300	0.028	300	0.0363	300	0.023	300	0.029	264	0.047
300	0.033	300	0.0249	297	0.023	300	0.03	258	0.034
300	0.033	300	0.0299	297	0.025	300	0.039	258	0.038
300	0.019	300	0.0374	291	0.03	300	0.02	231	0.025
294	0.034	300	0.0336	279	0.075	300	0.028	219	0.04
288	0.034	300	0.0397	264	0.025	300	0.032	219	0.031
282	0.03	300	0.0289	255	0.024	297	0.033	210	0.039
282	0.04	300	0.0307	228	0.015	261	0.042	207	0.047
273	0.043	300	0.0367	225	0.028	258	0.029	204	0.025
270	0.053	300	0.0434	222	0.03	246	0.035	198	0.021
261	0.038	300	0.0177	219	0.049	243	0.074	189	0.028
255	0.03	300	0.032	216	0.03	240	0.089	183	0.032
255	0.041	300	0.0223	213	0.03	228	0.03	177	0.025
243	0.045	300	0.0384	207	0.041	219	0.077	174	0.023
240	0.035	300	0.023	204	0.03	213	0.079	171	0.035
237	0.039	300	0.0235	198	0.043	207	0.079	168	0.086
234	0.045	300	0.0627	180	0.024	207	0.046	165	0.024
228	0.029	300	0.0276	180	0.03	204	0.074	162	0.071
222	0.048	300	0.0272	177	0.037	201	0.056	162	0.029
219	0.034	300	0.0253	177	0.028	198	0.028	162	0.076
216	0.059	300	0.0224	177	0.033	195	0.063	162	0.02
216	0.031	300	0.0191	171	0.031	186	0.033	159	0.052
213	0.035	300	0.026	153	0.018	180	0.042	153	0.08
210	0.047	300	0.0179	153	0.022	177	0.031	153	0.06
207	0.054	300	0.0295	153	0.027	177	0.034	153	0.027
204	0.051	300	0.0283	150	0.035	174	0.035	144	0.069
204	0.031	300	0.0207	135	0.035	168	0.022	141	0.022
204	0.05	300	0.0272	135	0.036	165	0.042	141	0.021
195	0.044	300	0.045	132	0.063	165	0.074	141	0.023
192	0.044	300	0.0383	132	0.018	165	0.085	138	0.036
189	0.026	300	0.0182	126	0.029	165	0.087	138	0.018
186	0.035	300	0.0169	126	0.021	165	0.055	135	0.047
186	0.038	300	0.0481	123	0.047	162	0.02	132	0.039
186	0.057	294	0.0659	120	0.048	159	0.048	132	0.082
186	0.015	294	0.0528	120	0.04	159	0.04	132	0.064
177	0.039	276	0.0413	117	0.018	156	0.033	132	0.095
177	0.044	276	0.0302	114	0.016	156	0.038	129	0.062
177	0.028	270	0.0448	114	0.039	150	0.048	129	0.077
174	0.041	267	0.0412	114	0.025	150	0.05	129	0.023
165	0.055	264	0.0237	111	0.047	150	0.034	126	0.075
165	0.047	261	0.0319	111	0.032	147	0.099	126	0.057
156	0.038	258	0.0272	108	0.02	144	0.082	126	0.034
153	0.027	246	0.0263	105	0.026	144	0.064	123	0.019
153	0.042	246	0.0399	105	0.03	144	0.062	120	0.038
153	0.025	237	0.0361	96	0.037	144	0.039	117	0.067
153	0.064	231	0.0215	96	0.031	141	0.097	117	0.033
153	0.032	222	0.0472	96	0.032	141	0.04	114	0.078
150	0.111	219	0.0217	96	0.056	141	0.023	111	0.074
138	0.044	219	0.0168	90	0.033	138	0.019	111	0.053
138	0.04	219	0.0411	87	0.017	135	0.028	111	0.075
138	0.029	213	0.0467	78	0.057	132	0.043	105	0.016
135	0.037	213	0.0333	75	0.05	129	0.055	105	0.094
135	0.041	204	0.0721	75	0.04	129	0.031	105	0.041
135	0.083	195	0.087	75	0.051	129	0.104	102	0.02
132	0.041	195	0.0537	72	0.041	129	0.103	102	0.058
132	0.055	192	0.037	72	0.026	129	0.035	102	0.068
132	0.071	192	0.0382	72	0.038	129	0.081	102	0.062
129	0.041	189	0.0265	72	0.015	126	0.036	99	0.09
129	0.079	183	0.0291	69	0.038	126	0.045	99	0.041
129	0.018	168	0.0296	69	0.023	126	0.088	99	0.07
126	0.043	168	0.0367	66	0.113	123	0.052	96	0.05
126	0.025	165	0.0361	66	0.064	123	0.083	96	0.097
123	0.081	165	0.0284	66	0.026	120	0.068	90	0.016
123	0.089	162	0.0427	66	0.019	114	0.083	87	0.091
120	0.077	153	0.0464	63	0.02	114	0.055	87	0.06
120	0.024	141	0.0372	63	0.049	114	0.062	84	0.017
117	0.026	138	0.0388	63	0.023	114	0.021	84	0.06
117	0.071	135	0.0236	60	0.033	111	0.061	84	0.103
117	0.039	135	0.0519	60	0.014	111	0.063	84	0.104
114	0.04	135	0.0651	60	0.02	108	0.06	81	0.014
114	0.045	135	0.028	57	0.063	105	0.029	81	0.091
111	0.054	132	0.109	57	0.088	102	0.077	81	0.103
111	0.086	132	0.0255	57	0.041	102	0.022	78	0.033
111	0.027	132	0.0351	57	0.061	102	0.064	78	0.024
111	0.028	129	0.0781	54	0.02	102	0.024	78	0.026
108	0.029	129	0.0437	54	0.024	99	0.074	75	0.099
108	0.07	129	0.0394	54	0.119	99	0.058	75	0.018
108	0.036	126	0.0313	54	0.074	99	0.095	75	0.032
108	0.058	126	0.028	54	0.028	99	0.051	75	0.103
105	0.044	123	0.055	51	0.044	99	0.082	75	0.097
105	0.041	120	0.0385	51	0.014	99	0.021	72	0.067
105	0.069	117	0.0206	51	0.12	96	0.027	72	0.044
105	0.057	114	0.0492	51	0.043	96	0.087	72	0.09
105	0.075	114	0.0227	51	0.063	96	0.057	72	0.021
102	0.027	114	0.0467	48	0.065	93	0.059	72	0.115
102	0.105	111	0.0391	48	0.044	93	0.047	69	0.043
102	0.03	111	0.0285	48	0.069	93	0.039	69	0.054
102	0.047	108	0.0512	48	0.097	93	0.063	69	0.086
102	0.029	108	0.0382	48	0.039	93	0.093	66	0.029
99	0.066	105	0.0584	48	0.048	93	0.056	66	0.094
96	0.044	105	0.0709	45	0.082	93	0.018	66	0.103
96	0.027	102	0.0658	45	0.029	93	0.082	66	0.097
96	0.078	102	0.0813	45	0.097	90	0.056	66	0.057
96	0.059	102	0.0479	45	0.016	90	0.015	63	0.033
93	0.051	102	0.0565	45	0.067	90	0.059	63	0.01
93	0.046	102	0.0443	45	0.083	90	0.065	63	0.104
93	0.045	99	0.0372	45	0.08	90	0.051	63	0.116
93	0.048	99	0.0405	45	0.041	90	0.07	63	0.015
93	0.035	99	0.0846	42	0.012	87	0.089	63	0.038
93	0.048	96	0.04	42	0.046	84	0.086	63	0.029
93	0.052	96	0.0944	42	0.063	84	0.072	63	0.029
90	0.052	96	0.0162	42	0.029	84	0.074	63	0.036
90	0.07	96	0.1013	39	0.041	84	0.076	60	0.042
90	0.038	93	0.0305	39	0.06	84	0.018	60	0.071
90	0.022	90	0.0512	39	0.081	81	0.034	60	0.047
90	0.095	90	0.0347	39	0.033	81	0.1	60	0.078
90	0.049	87	0.0212	39	0.057	81	0.078	57	0.059
87	0.036	87	0.0606	39	0.042	81	0.102	57	0.086
87	0.031	87	0.1222	36	0.017	81	0.074	57	0.096
87	0.119	84	0.0758	36	0.073	81	0.026	57	0.02
84	0.06	84	0.0314	36	0.155	81	0.026	57	0.125
84	0.025	84	0.0507	36	0.015	78	0.112	57	0.05
84	0.051	81	0.0932	36	0.02	78	0.122	57	0.032
84	0.048	81	0.0384	36	0.061	78	0.109	57	0.066
84	0.055	81	0.0371	36	0.049	78	0.059	57	0.094
84	0.103	81	0.0552	36	0.059	75	0.069	57	0.084
84	0.048	78	0.0371	36	0.03	75	0.072	57	0.027
84	0.044	78	0.0693	36	0.028	75	0.097	54	0.053
81	0.054	75	0.0436	36	0.105	75	0.036	54	0.018
81	0.063	75	0.0825	36	0.027	75	0.038	54	0.075
81	0.055	75	0.0652	36	0.051	75	0.099	54	0.032
81	0.05	72	0.0627	36	0.029	75	0.092	54	0.046
81	0.079	72	0.0164	33	0.13	75	0.067	54	0.012
81	0.048	72	0.071	33	0.064	72	0.045	54	0.081
78	0.063	72	0.0615	33	0.04	72	0.048	54	0.021
78	0.03	72	0.034	33	0.01	72	0.097	54	0.115
78	0.042	69	0.0238	33	0.014	69	0.073	54	0.1
78	0.095	69	0.0843	30	0.093	69	0.1	54	0.019
78	0.028	69	0.0634	30	0.075	69	0.122	54	0.087
78	0.062	69	0.0361	30	0.05	69	0.085	54	0.005
78	0.021	69	0.0323	30	0.025	66	0.098	54	0.092
78	0.022	69	0.0732	30	0.066	66	0.124	54	0.055
75	0.091	69	0.0653	30	0.083	66	0.099	51	0.121
75	0.053	66	0.0503	30	0.052	66	0.117	51	0.018
75	0.079	66	0.0416	30	0.018	66	0.095	51	0.02
75	0.064	66	0.0529	30	0.01	66	0.027	51	0.085
75	0.026	66	0.0952	30	0.027	66	0.071	51	0.132
75	0.064	63	0.0595	30	0.062	66	0.095	51	0.108
75	0.027	63	0.1018	30	0.057	66	0.031	51	0.041
75	0.02	63	0.1096	30	0.034	63	0.083	51	0.059
75	0.042	63	0.0619	30	0.092	63	0.088	51	0.072
72	0.062	60	0.0365	30	0.102	63	0.138	51	0.053
72	0.026	60	0.0576	27	0.101	60	0.055	48	0.082
72	0.036	60	0.0649	27	0.078	60	0.089	48	0.072
72	0.087	60	0.0584	27	0.051	60	0.081	48	0.047
69	0.034	60	0.085	27	0.018	60	0.106	48	0.009
69	0.059	60	0.07	27	0.012	60	0.075	48	0.033
69	0.081	57	0.0228	27	0.054	60	0.066	48	0.073
69	0.058	57	0.0423	27	0.042	60	0.097	48	0.126
69	0.055	57	0.0637	27	0.066	57	0.071	48	0.018
69	0.021	57	0.1037	27	0.028	57	0.092	48	0.074
69	0.071	57	0.0746	27	0.059	57	0.05	48	0.012
66	0.014	57	0.0353	27	0.099	57	0.123	48	0.011
66	0.07	57	0.0249	27	0.018	57	0.039	48	0.05
66	0.036	57	0.0805	27	0.124	57	0.074	48	0.018
66	0.024	57	0.0322	27	0.071	57	0.117	48	0.055
66	0.044	57	0.015	24	0.014	54	0.019	45	0.115
66	0.068	57	0.037	24	0.092	54	0.108	45	0.072
66	0.073	54	0.1157	24	0.041	54	0.109	45	0.033
66	0.026	54	0.0702	24	0.02	54	0.082	45	0.07
66	0.043	51	0.0401	24	0.017	54	0.103	45	0.034
66	0.108	51	0.0506	24	0.089	54	0.085	45	0.067
66	0.064	51	0.0504	24	0.024	54	0.104	45	0.058
63	0.041	51	0.0731	24	0.064	54	0.07	45	0.089
63	0.043	48	0.0431	24	0.103	54	0.102	45	0.017
63	0.095	48	0.0165	24	0.008	54	0.081	45	0.02
63	0.096	48	0.0932	24	0.074	54	0.064	42	0.087
63	0.049	48	0.0669	24	0.035	51	0.098	42	0.033
63	0.067	48	0.0181	24	0.006	51	0.072	42	0.106
63	0.083	48	0.0943	24	0.045	51	0.101	42	0.035
63	0.113	48	0.0695	21	0.059	51	0.077	42	0.051
63	0.05	45	0.0687	21	0.054	51	0.038	39	0.115
63	0.043	45	0.0335	21	0.019	51	0.063	39	0.012
63	0.03	45	0.0438	21	0.078	51	0.105	39	0.027
63	0.034	45	0.077	21	0.038	51	0.062	39	0.035
63	0.066	45	0.0602	21	0.046	51	0.063	39	0.045
63	0.048	45	0.0368	21	0.04	51	0.067	39	0.019
63	0.048	45	0.0615	21	0.054	51	0.095	39	0.121
63	0.033	45	0.1379	21	0.045	51	0.08	36	0.062
60	0.03	45	0.0305	21	0.024	51	0.066	36	0.086
60	0.102	45	0.0477	21	0.057	48	0.028	36	0.106
60	0.116	42	0.0459	21	0.131	48	0.035	36	0.084
60	0.054	42	0.0322	21	0.065	48	0.02	36	0.059
60	0.03	42	0.0213	21	0.031	48	0.094	36	0.116
60	0.094	42	0.0697	18	0.083	48	0.026	36	0.071
60	0.06	42	0.0436	18	0.064	48	0.09	36	0.082
60	0.055	42	0.046	18	0.066	48	0.067	36	0.051
60	0.071	42	0.0961	18	0.059	48	0.084	36	0.065
60	0.022	39	0.0631	18	0.052	48	0.063	36	0.022
57	0.072	39	0.0656	18	0.206	48	0.066	36	0.019
57	0.1	39	0.038	18	0.065	48	0.052	36	0.11
57	0.085	39	0.0193	18	0.022	48	0.093	36	0.053
57	0.07	39	0.0713	18	0.056	48	0.056	36	0.084
57	0.055	39	0.1089	18	0.06	48	0.065	36	0.082
57	0.074	39	0.0687	18	0.034	48	0.135	33	0.037
57	0.033	39	0.0188	18	0.013	48	0.068	33	0.058
57	0.082	39	0.0181	18	0.015	45	0.069	33	0.048
57	0.074	39	0.044	18	0.142	45	0.032	33	0.136
57	0.036	39	0.0298	18	0.116	45	0.149	33	0.056
57	0.019	39	0.028	18	0.115	45	0.121	33	0.09
57	0.046	36	0.0571	18	0.064	45	0.017	33	0.076
57	0.055	36	0.0216	18	0.005	45	0.14	33	0.052
54	0.014	36	0.0852	18	0.008	45	0.105	33	0.09
54	0.021	36	0.0239	18	0.036	45	0.068	33	0.076
54	0.06	36	0.0418	18	0.034	45	0.054	33	0.03
54	0.1	36	0.077	18	0.025	45	0.036	33	0.027
54	0.067	36	0.0364	18	0.056	45	0.077	33	0.104
54	0.024	36	0.0207	18	0.05	45	0.072	33	0.109
54	0.057	36	0.1002	18	0.056	42	0.023	33	0.087
54	0.057	36	0.0975	18	0.027	42	0.096	30	0.017
54	0.034	36	0.0758	18	0.119	42	0.115	30	0.066
54	0.063	36	0.0296	15	0.094	42	0.062	30	0.013
54	0.072	36	0.0907	15	0.01	42	0.101	30	0.11
51	0.111	36	0.0336	15	0.011	42	0.035	30	0.112
51	0.09	36	0.081	15	0.142	42	0.053	30	0.061
51	0.069	36	0.0251	15	0.105	42	0.085	30	0.062
51	0.072	33	0.1194	15	0.022	42	0.016	30	0.014
51	0.065	33	0.1163	15	0.078	42	0.105	30	0.134
51	0.086	33	0.0399	15	0.014	42	0.065	30	0.011
51	0.03	33	0.0663	15	0.042	42	0.099	30	0.091
51	0.048	33	0.0191	15	0.084	42	0.085	30	0.087
51	0.047	33	0.0837	15	0.014	42	0.036	30	0.107
51	0.067	33	0.0697	15	0.012	39	0.058	30	0.012
51	0.057	33	0.0313	15	0.026	39	0.156	30	0.015
48	0.079	33	0.0438	15	0.099	39	0.113	30	0.101
48	0.087	33	0.0561	15	0.026	39	0.051	30	0.049
48	0.02	33	0.0656	15	0.089	39	0.097	30	0.065
48	0.041	33	0.0358	15	0.018	39	0.09	30	0.029
48	0.042	33	0.0677	15	0.098	39	0.063	30	0.07
48	0.031	33	0.1058	15	0.023	39	0.069	27	0.024
48	0.05	33	0.0204	15	0.093	39	0.105	27	0.057
48	0.069	33	0.0371	15	0.022	39	0.083	27	0.013
48	0.042	30	0.0503	15	0.018	39	0.038	27	0.102
48	0.044	30	0.1794	15	0.03	39	0.066	27	0.071
48	0.026	30	0.0829	15	0.012	39	0.113	27	0.146
48	0.011	30	0.0242	15	0.042	39	0.113	27	0.11
45	0.079	30	0.0562	15	0.018	36	0.121	27	0.085
45	0.055	30	0.1436	15	0.106	36	0.098	27	0.076
45	0.082	30	0.0859	15	0.045	36	0.061	27	0.046
45	0.124	30	0.025	15	0.013	36	0.104	27	0.104
45	0.109	30	0.0885	15	0.195	36	0.063	27	0.072
45	0.071	30	0.0437	15	0.011	36	0.104	27	0.071
45	0.081	30	0.083	15	0.024	36	0.054	27	0.057
45	0.077	30	0.0497	15	0.119	36	0.09	27	0.133
45	0.117	30	0.0358	15	0.062	36	0.058	27	0.067
45	0.089	30	0.0926	15	0.072	36	0.066	27	0.068
45	0.045	30	0.0104	12	0.015	36	0.075	27	0.079
45	0.143	30	0.0614	12	0.006	36	0.03	27	0.073
45	0.029	27	0.0464	12	0.078	33	0.029	27	0.09
45	0.023	27	0.094	12	0.071	33	0.102	27	0.079
45	0.082	27	0.0524	12	0.032	33	0.104	24	0.037
45	0.03	27	0.0505	12	0.009	33	0.101	24	0.111
45	0.047	27	0.02	12	0.195	33	0.085	24	0.081
42	0.049	27	0.062	12	0.105	33	0.084	24	0.006
42	0.032	27	0.0911	12	0.026	33	0.123	24	0.106
42	0.011	27	0.0242	12	0.134	33	0.099	24	0.02
42	0.047	27	0.138	12	0.05	33	0.015	24	0.01
42	0.093	27	0.1211	12	0.122	33	0.081	24	0.098
42	0.063	27	0.0168	12	0.013	33	0.043	24	0.138
42	0.048	27	0.08	12	0.02	33	0.161	24	0.096
42	0.077	27	0.0754	12	0.026	33	0.075	24	0.131
42	0.07	27	0.043	12	0.037	33	0.086	24	0.119
42	0.036	27	0.0466	12	0.122	33	0.025	24	0.098
42	0.081	27	0.0715	12	0.012	33	0.089	24	0.1
42	0.082	27	0.0752	12	0.03	33	0.094	24	0.071
42	0.07	27	0.06	12	0.045	33	0.027	24	0.076
42	0.066	27	0.0534	12	0.083	33	0.102	24	0.066
42	0.086	27	0.1196	12	0.053	33	0.125	24	0.209
39	0.044	27	0.0232	12	0.061	33	0.11	24	0.121
39	0.116	27	0.1499	12	0.129	33	0.015	24	0.141
39	0.059	27	0.0142	12	0.104	33	0.096	24	0.172
39	0.044	27	0.0745	12	0.012	33	0.012	21	0.091
39	0.119	24	0.0617	12	0.058	33	0.058	21	0.011
39	0.039	24	0.0539	12	0.154	33	0.115	21	0.089
39	0.026	24	0.0971	12	0.009	33	0.103	21	0.12
39	0.066	24	0.0141	12	0.102	33	0.107	21	0.093
39	0.017	24	0.0321	12	0.076	33	0.065	21	0.097
39	0.034	24	0.1158	12	0.015	33	0.088	21	0.16
39	0.073	24	0.0465	12	0.016	33	0.084	21	0.112
39	0.039	24	0.0926	12	0.061	30	0.1	21	0.092
39	0.069	24	0.036	12	0.007	30	0.025	21	0.101
39	0.026	24	0.1213	12	0.061	30	0.077	21	0.104
39	0.017	24	0.0181	12	0.026	30	0.099	21	0.047
39	0.051	24	0.0816	12	0.006	30	0.063	21	0.044
39	0.077	24	0.0469	12	0.084	30	0.019	21	0.1
39	0.097	24	0.052	12	0.003	30	0.13	21	0.003
36	0.085	24	0.0621	12	0.061	30	0.058	21	0.062
36	0.028	24	0.0583	12	0.011	30	0.019	21	0.06
36	0.129	24	0.0826	12	0	30	0.075	21	0.051
36	0.081	21	0.0523	12	0.023	30	0.018	21	0.09
36	0.015	21	0.0383	12	0.074	30	0.037	21	0.118
36	0.057	21	0.0441	12	0.04	30	0.018	21	0.081
36	0.075	21	0.0669	9	0.025	30	0.067	21	0.157
36	0.108	21	0.0735	9	0.101	30	0.107	21	0.023
36	0.056	21	0.1572	9	0.057	30	0.091	21	0.122
36	0.059	21	0.0457	9	0.114	30	0.131	21	0.075
36	0.084	21	0.0809	9	0.021	30	0.046	21	0.041
36	0.038	21	0.0398	9	0.021	30	0.02	21	0.109
36	0.053	21	0.0906	9	0.054	30	0.119	18	0.071
36	0.027	21	0.0145	9	0.042	30	0.066	18	0.007
36	0.023	21	0.07	9	0.076	30	0.045	18	0.013
36	0.051	21	0.0505	9	0.017	30	0.134	18	0.092
36	0.06	21	0.0141	9	0.063	30	0.077	18	0.127
36	0.072	21	0.1413	9	0.046	30	0.114	18	0.152
36	0.061	21	0.0717	9	0.075	30	0.096	18	0.005
36	0.046	21	0.0395	9	0.065	30	0.062	18	0.079
36	0.027	21	0.0144	9	0.037	30	0.047	18	0.133
36	0.066	21	0.1021	9	0.094	30	0.033	18	0.007
36	0.102	21	0.049	9	0.014	27	0.116	18	0.062
36	0.069	21	0.1292	9	0.075	27	0.088	18	0.044
36	0.087	21	0.0281	9	0.05	27	0.094	18	0.135
33	0.125	21	0.0859	9	0.048	27	0.107	18	0.03
33	0.138	21	0.0207	9	0.014	27	0.03	18	0.12
33	0.027	21	0.1163	9	0.035	27	0.179	18	0.067
33	0.11	21	0.0162	9	0.143	27	0.102	18	0.062
33	0.064	21	0.0458	9	0.013	27	0.056	18	0.03
33	0.061	21	0.0157	9	0.1	27	0.081	18	0.091
33	0.084	21	0.028	9	0.103	27	0.033	18	0.004
33	0.015	21	0.0304	9	0.105	27	0.066	18	0.074
33	0.077	21	0.068	9	0.03	27	0.095	18	0.057
33	0.114	18	0.079	9	0.097	27	0.089	18	0.012
33	0.101	18	0.0206	9	0.09	27	0.124	18	0.02
33	0.061	18	0.0477	9	0.066	27	0.088	18	0.05
33	0.035	18	0.0219	9	0.083	27	0.014	18	0.081
33	0.032	18	0.0368	9	0.032	27	0.038	18	0.088
33	0.065	18	0.0167	9	0.114	27	0.129	18	0.009
33	0.008	18	0.064	9	0.036	27	0.111	18	0.009
33	0.039	18	0.0269	9	0.118	27	0.052	18	0.03
33	0.143	18	0.0544	9	0.084	27	0.038	18	0.095
33	0.142	18	0.0849	9	0.016	27	0.1	18	0.026
33	0.076	18	0.0262	9	0.005	27	0.107	18	0.162
33	0.101	18	0.1065	9	0.158	27	0.021	18	0.014
33	0.071	18	0.18	9	0.085	27	0.133	18	0.061
33	0.052	18	0.1012	9	0.103	27	0.091	18	0.097
33	0.085	18	0.0475	9	0.042	27	0.036	18	0.127
30	0.066	18	0.0237	9	0.016	27	0.058	18	0.025
30	0.075	18	0.0246			27	0.127	18	0.133
30	0.078	18	0.0537			27	0.114	18	0.079
30	0.014	18	0.0199			27	0.082	18	0.077
30	0.012	18	0.0587			27	0.099	18	0.038
30	0.074	18	0.0357			27	0.059	18	0.07
30	0.095	18	0.0805			27	0.029	18	0.079
30	0.039	18	0.172			27	0.015	15	0.065
30	0.033	18	0.1001			27	0.08	15	0.064
30	0.109	18	0.0494			27	0.047	15	0.034
30	0.095	18	0.0346			24	0.112	15	0.168
30	0.058	18	0.0906			24	0.064	15	0.11
30	0.063	18	0.0744			24	0.007	15	0.109
30	0.024	18	0.0623			24	0.054	15	0.084
30	0.071	18	0.0539			24	0.013	15	0.093
30	0.022	18	0.0498			24	0.09	15	0.02
30	0.102	18	0.0477			24	0.158	15	0.21
30	0.12	18	0.0147			24	0.023	15	0.132
30	0.072	18	0.105			24	0.139	15	0.12
30	0.121	15	0.024			24	0.116	15	0.082
30	0.091	15	0.0443			24	0.114	15	0.09
30	0.076	15	0.0271			24	0.051	15	0.057
30	0.058	15	0.0404			24	0.089	15	0.097
30	0.009	15	0.0095			24	0.166	15	0.135
30	0.097	15	0.1014			24	0.13	15	0.014
30	0.129	15	0.0831			24	0.09	15	0.092
30	0.157	15	0.1105			24	0.098	15	0.009
30	0.036	15	0.0874			24	0.075	15	0.006
30	0.063	15	0.0451			24	0.087	15	0.023
30	0.052	15	0.0654			24	0.111	15	0.085
27	0.102	15	0.0396			24	0.111	15	0.085
27	0.054	15	0.0444			24	0.126	15	0.013
27	0.025	15	0.0167			24	0.017	15	0.175
27	0.067	15	0.1278			24	0.14	15	0.098
27	0.039	15	0.0409			24	0.038	15	0.064
27	0.101	15	0.0352			24	0.119	15	0.085
27	0.09	15	0.1161			24	0.031	15	0.082
27	0.057	15	0.0989			24	0.086	15	0.087
27	0.06	15	0.0563			24	0.041	15	0.133
27	0.07	15	0.0108			24	0.038	15	0.059
27	0.022	15	0.0345			24	0.085	15	0.063
27	0.095	15	0.0469			24	0.038	15	0.063
27	0.082	15	0.0637			21	0.089	15	0.11
27	0.112	15	0.0268			21	0.154	15	0.126
27	0.056	15	0.0132			21	0.125	15	0.023
27	0.023	15	0.0489			21	0.104	15	0.085
27	0.019	15	0.0483			21	0.056	15	0.058
27	0.149	15	0.0255			21	0.119	15	0.114
27	0.041	15	0.044			21	0.072	15	0.14
27	0.066	15	0.0621			21	0.103	15	0.038
27	0.076	15	0.0399			21	0.04	15	0.091
27	0.016	15	0.0155			21	0.062	15	0.165
27	0.065	15	0.0227			21	0.023	15	0.014
27	0.008	12	0.0952			21	0.119	15	0.026
27	0.044	12	0.0862			21	0.126	15	0.149
27	0.074	12	0.1197			21	0.057	15	0.064
27	0.096	12	0.0459			21	0.132	15	0.139
27	0.037	12	0.1236			21	0.076	15	0.074
27	0.081	12	0.0356			21	0.092	15	0.06
27	0.094	12	0.0758			21	0.116	15	0.025
27	0.074	12	0.0221			21	0.103	15	0.107
27	0.039	12	0.0452			21	0.084	15	0.07
27	0.033	12	0.0187			21	0.108	15	0.065
27	0.013	12	0.0487			21	0.161	15	0.108
27	0.055	12	0.0729			21	0.021	15	0.062
27	0.095	12	0.1095			21	0.064	15	0.116
27	0.016	12	0.0304			21	0.159	15	0.014
27	0.099	12	0.0642			21	0.129	15	0.007
27	0.099	12	0.0594			21	0.09	12	0.055
27	0.035	12	0.0294			21	0.143	12	0.01
27	0.152	12	0.0549			21	0.035	12	0.073
27	0.131	12	0.0568			21	0.04	12	0.037
24	0.046	12	0.0526			21	0.071	12	0.027
24	0.021	12	0.0068			21	0.098	12	0.06
24	0.044	12	0.1626			21	0.108	12	0.101
24	0.022	12	0.0142			21	0.08	12	0.104
24	0.063	12	0.0587			21	0.088	12	0.172
24	0.041	12	0.052			21	0.05	12	0.028
24	0.182	12	0.0142			21	0.085	12	0.008
24	0.077	12	0.0849			21	0.096	12	0.15
24	0.105	12	0.0139			21	0.06	12	0.075
24	0.012	12	0.0959			21	0.173	12	0.126
24	0.037	12	0.0438			21	0.079	12	0.178
24	0.101	12	0.1242			21	0.165	12	0.037
24	0.014	12	0.0409			21	0.057	12	0.156
24	0.024	12	0.0302			21	0.043	12	0.127
24	0.047	12	0.0592			21	0.055	12	0.075
24	0.028	12	0.0666			21	0.124	12	0.098
24	0.069	12	0.1633			21	0.09	12	0.197
24	0.113	12	0.0345			21	0.078	12	0.062
24	0.091	12	0.0073			21	0.025	12	0.022
24	0.075	12	0.1708			21	0.078	12	0.044
24	0.086	12	0.0738			18	0.128	12	0.02
24	0.073	12	0.0288			18	0.133	12	0.069
24	0.113	12	0.0202			18	0.035	12	0.106
24	0.063	12	0.0304			18	0.108	12	0.17
24	0.075	12	0.0436			18	0.076	12	0.101
24	0.015	12	0.0423			18	0.14	12	0.068
24	0.061	12	0.0035			18	0.145	12	0.13
24	0.048	12	0.0696			18	0.058	12	0.073
24	0.074	12	0.0141			18	0.046	12	0.167
24	0.065	12	0.0033			18	0.145	12	0.073
24	0.035	12	0.0023			18	0.026	12	0.015
24	0.105	12	0.1163			18	0.055	12	0.032
24	0.096	12	0.0204			18	0.062	12	0.076
24	0.085	12	0.0373			18	0.164	12	0.018
24	0.026	9	0.1036			18	0.114	12	0.054
24	0.079	9	0.019			18	0.078	12	0.005
24	0.063	9	0.1141			18	0.14	12	0.06
24	0.044	9	0.0631			18	0.067	12	0.098
24	0.036	9	0.0306			18	0.066	12	0.123
24	0.06	9	0.1486			18	0.136	12	0.086
24	0.108	9	0.0896			18	0.021	12	0.121
24	0.032	9	0.0264			18	0.044	12	0.067
24	0.025	9	0.076			18	0.05	12	0.019
24	0.089	9	0.1441			18	0.089	12	0.132
24	0.044	9	0.095			18	0.075	12	0.029
24	0.123	9	0.0311			18	0.036	12	0.065
24	0.099	9	0.0157			18	0.136	12	0.057
24	0.034	9	0.0716			18	0.006	12	0.089
24	0.082	9	0.1647			18	0.09	12	0.165
24	0.02	9	0.0793			18	0.056	12	0.078
24	0.076	9	0.0629			18	0.093	12	0.006
24	0.103	9	0.1407			18	0.053	12	0.154
24	0.145	9	0.0267			18	0.013	12	0.081
24	0.129	9	0.1426			18	0.085	12	0.019
21	0.025	9	0.0636			18	0.071	12	0.147
21	0.067	9	0.013			18	0.11	12	0.047
21	0.163	9	0.0506			18	0.061	12	0.21
21	0.03	9	0.0946			18	0.072	12	0.034
21	0.059	9	0.0526			18	0.161	12	0.097
21	0.113	9	0.0485			18	0.074	12	0.101
21	0.096	9	0.1663			18	0.049	12	0.184
21	0.135	9	0.1334			18	0.062	12	0.139
21	0.06	9	0.0997			18	0.104	9	0.099
21	0.058	9	0.1511			18	0.039	9	0.151
21	0.014	9	0.1326			18	0.071	9	0.005
21	0.015	9	0.1			15	0.163	9	0.162
21	0.042	9	0.0772			15	0.016	9	0.138
21	0.025	9	0.0667			15	0.036	9	0.063
21	0.047	9	0.099			15	0.02	9	0.17
21	0.079	9	0.1038			15	0.06	9	0.049
21	0.03	9	0.1342			15	0.141	9	0.151
21	0.117	9	0.0066			15	0.076	9	0.101
21	0.128	9	0.0808			15	0.089	9	0.074
21	0.164	9	0.0367			15	0.151	9	0.076
21	0.076	9	0.1075			15	0.094	9	0.105
21	0.104	9	0.1312			15	0.146	9	0.112
21	0.014	9	0.0368			15	0.146	9	0.123
21	0.052	9	0.0606			15	0.104	9	0.071
21	0.093	9	0.0764			15	0.024	9	0.092
21	0.101	9	0.1012			15	0.1	9	0.012
21	0.069	9	0.1603			15	0.027	9	0.04
21	0.057	9	0.0543			15	0.118	9	0.013
21	0.061	9	0.0306			15	0.12	9	0.027
21	0.043	9	0.0789			15	0.04	9	0.074
21	0.034	9	0.0054			15	0.086	9	0.065
21	0.087	9	0.0856			15	0.083	9	0.103
21	0.094	9	0.1228			15	0.077	9	0.047
21	0.07	9	0.1945			15	0.029	9	0.138
21	0.047	9	0.0082			15	0.093	9	0.054
21	0.069	9	0.1074			15	0.11	9	0.005
21	0.034	9	0.2002			15	0.059	9	0.067
21	0.166	9	0.1485			15	0.101	9	0.12
21	0.053	9	0.0263			15	0.142	9	0.041
21	0.036	9	0.1838			15	0.128	9	0.067
21	0.07	9	0.0254			15	0.094	9	0.031
21	0.03	9	0.1213			15	0.088	9	0.161
21	0.102	9	0.0388			15	0.091	9	0.135
21	0.043	9	0.0716			15	0.063	9	0.01
21	0.089	9	0.0059			15	0.187	9	0.032
21	0.036	9	0.0869			15	0.035	9	0.149
21	0.01	9	0.0406			15	0.09	9	0.007
21	0.106	9	0.0448			15	0.089	9	0.065
21	0.083	9	0.0311			15	0.15	9	0.071
21	0.141	9	0.0987			15	0.018	9	0.049
21	0.053	9	0.1422			15	0.146	9	0.195
21	0.064	9	0.1723			15	0.09	9	0.096
21	0.138	9	0.0516			15	0.077	9	0.019
18	0.017	9	0.0443			15	0.039	9	0.083
18	0.073	9	0.1512			15	0.094	9	0.155
18	0.087	9	0.0243			15	0.057	9	0.094
18	0.155	9	0.1601			15	0.143	9	0.064
18	0.122	9	0.0682			15	0.17	9	0.145
18	0.024	9	0.2245			15	0.075	9	0.096
18	0.014	9	0.1069			15	0.033	9	0.141
18	0.062	9	0.0035			12	0.12	9	0.081
18	0.025	9	0.1743			12	0.078	9	0.025
18	0.101	9	0.0364			12	0.106	9	0.169
18	0.048	9	0.1428			12	0.051	9	0.017
18	0.068	9	0.1505			12	0.072	9	0.057
18	0.105	9	0.0276			12	0.136	9	0.059
18	0.054					12	0.151	9	0.068
18	0.097					12	0.056	9	0.199
18	0.095					12	0.105	9	0.033
18	0.029					12	0.137	9	0.087
18	0.038					12	0.084	9	0.088
18	0.015					12	0.091	9	0.143
18	0.061					12	0.065	9	0.219
18	0.026					12	0.104	9	0.059
18	0.104					12	0.077	9	0.13
18	0.016					12	0.015	9	0.093
18	0.149					12	0.141	9	0.004
18	0.132					12	0.064	9	0.085
18	0.079					12	0.061	9	0.013
18	0.045					12	0.016	9	0.011
18	0.103					12	0.055	9	0.156
18	0.111					12	0.023	9	0.181
18	0.021					12	0.088	9	0.076
18	0.066					12	0.042	9	0.081
18	0.119					12	0.045	9	0.101
18	0.033					12	0.095	9	0.004
18	0.072					12	0.106	9	0.01
18	0.093					12	0.02	9	0.136
18	0.096					12	0.118	9	0.114
18	0.054					12	0.062	9	0.12
18	0.07					12	0.047	9	0.067
18	0.077					12	0.044	9	0.095
18	0.045					12	0.089	9	0.007
18	0.091					12	0.037	9	0.109
18	0.066					12	0.096	9	0.044
18	0.062					12	0.016	9	0.109
18	0.083					12	0.041	9	0.098
18	0.099					12	0.054	9	0.015
18	0.1					12	0.058	9	0.027
18	0.024					12	0.156	9	0.086
18	0.088					12	0.074
18	0.084					12	0.002
18	0.078					12	0.01
18	0.107					12	0.126
18	0.03					12	0.19
18	0.147					12	0.024
18	0.046					12	0.057
18	0.026					12	0.072
18	0.044					12	0.168
18	0.073					12	0.119
18	0.039					12	0.099
18	0.091					12	0.017
18	0.071					12	0.026
18	0.076					12	0.055
18	0.068					12	0.073
18	0.129					12	0.111
18	0.018					12	0.087
18	0.07					12	0.097
18	0.154					12	0.208
18	0.041					12	0.049
18	0.033					12	0.01
15	0.106					12	0.102
15	0.038					12	0.114
15	0.162					12	0.106
15	0.105					12	0.03
15	0.018					12	0.131
15	0.106					12	0.036
15	0.086					12	0.08
15	0.029					12	0.111
15	0.024					12	0.08
15	0.014					12	0.017
15	0.046					12	0.127
15	0.08					12	0.13
15	0.159					12	0.035
15	0.056					12	0.077
15	0.033					12	0.053
15	0.019					12	0.029
15	0.106					12	0.091
15	0.108					12	0.093
15	0.03					12	0.034
15	0.082					12	0.062
15	0.057					12	0.045
15	0.015					12	0.027
15	0.067					12	0.049
15	0.024					12	0.012
15	0.016					9	0.085
15	0.092					9	0.007
15	0.075					9	0.155
15	0.051					9	0.023
15	0.085					9	0.223
15	0.11					9	0.142
15	0.037					9	0.146
15	0.048					9	0.205
15	0.029					9	0.14
15	0.034					9	0.095
15	0.008					9	0.223
15	0.089					9	0.079
15	0.091					9	0.004
15	0.118					9	0.111
15	0.115					9	0.017
15	0.045					9	0.036
15	0.055					9	0.164
15	0.03					9	0.159
15	0.134					9	0.028
15	0.073					9	0.02
15	0.086					9	0.014
15	0.021					9	0.047
15	0.165					9	0.061
15	0.105					9	0.104
15	0.06					9	0.123
15	0.073					9	0.128
15	0.084					9	0.033
15	0.084					9	0.087
15	0.049					9	0.144
15	0.097					9	0.155
15	0.049					9	0.018
15	0.02					9	0.11
15	0.108					9	0.124
15	0.085					9	0.131
15	0.035					9	0.013
15	0.051					9	0.1
15	0.093					9	0.165
15	0.058					9	0.063
15	0.071					9	0.106
15	0.043					9	0.159
15	0.18					9	0.101
15	0.094					9	0.019
15	0.069					9	0.165
15	0.053					9	0.079
15	0.213					9	0.099
15	0.083					9	0.14
15	0.147					9	0.029
15	0.216					9	0.16
15	0.072					9	0.13
15	0.081					9	0.085
15	0.095					9	0.045
15	0.007					9	0.064
15	0.044					9	0.036
15	0.077					9	0.049
15	0.09					9	0.242
15	0.081					9	0.016
15	0.14					9	0.147
15	0.017					9	0.073
15	0.106					9	0.09
15	0.106					9	0.044
15	0.121					9	0.042
15	0.133					9	0.027
15	0.12					9	0.209
15	0.135					9	0.057
15	0.029					9	0.068
12	0.007					9	0.09
12	0.039					9	0.162
12	0.062					9	0.118
12	0.036					9	0.065
12	0.034					9	0.091
12	0.012					9	0.11
12	0.063					9	0.038
12	0.03					9	0.022
12	0.134					9	0.035
12	0.077					9	0.152
12	0.145					9	0.077
12	0.068					9	0.031
12	0.143					9	0.163
12	0.06					9	0.074
12	0.066					9	0.017
12	0.182					9	0.094
12	0.01					9	0.004
12	0.013					9	0.124
12	0.011					9	0.15
12	0.082					9	0.204
12	0.143					9	0.081
12	0.035					9	0.047
12	0.108					9	0.093
12	0.092					9	0.167
12	0.044					9	0.168
12	0.15					9	0.137
12	0.076					9	0.12
12	0.105					9	0.191
12	0.039					9	0.089
12	0.03					9	0.022
12	0.009					9	0.062
12	0.027					9	0.116
12	0.085					9	0.055
12	0.137					9	0.063
12	0.02					9	0.013
12	0.071
12	0.008
12	0.025
12	0.188
12	0.053
12	0.004
12	0.025
12	0.013
12	0.011
12	0.062
12	0.104
12	0.118
12	0.084
12	0.146
12	0.164
12	0.022
12	0.057
12	0.066
12	0.048
12	0.069
12	0.148
12	0.01
12	0.047
12	0.112
12	0.068
12	0.103
12	0.121
12	0.134
12	0.047
12	0.044
12	0.05
12	0.015
12	0.032
12	0.054
12	0.047
12	0.067
12	0.068
12	0.033
12	0.017
12	0.118
12	0.019
12	0.018
12	0.027
12	0.074
12	0.107
12	0.108
12	0.006
12	0.084
12	0.058
12	0.279
12	0.099
12	0.071
12	0.018
12	0.02
12	0.059
12	0.163
12	0.099
12	0.085
12	0.044
12	0.004
12	0.052
12	0.187
12	0.082
12	0.112
12	0.064
12	0.024
12	0.02
12	0.103
12	0.052
12	0.057
12	0.062
12	0.073
12	0.094
12	0.06
12	0.012
12	0.017
12	0.05
12	0.017
12	0.06
9	0.061
9	0.085
9	0.031
9	0.096
9	0.053
9	0.131
9	0.155
9	0.061
9	0.055
9	0.223
9	0.087
9	0.118
9	0.126
9	0.145
9	0.062
9	0.087
9	0.004
9	0.134
9	0.2
9	0.107
9	0.209
9	0.007
9	0.011
9	0.026
9	0.019
9	0.204
9	0.174
9	0.164
9	0.025
9	0.029
9	0.027
9	0.136
9	0.07
9	0.011
9	0.015
9	0.015
9	0.083
9	0.169
9	0.041
9	0.118
9	0.07
9	0.058
9	0.058
9	0.084
9	0.099
9	0.118
9	0.054
9	0.077
9	0.031
9	0.014
9	0.055
9	0.031
9	0.015
9	0.038
9	0.024
9	0.059
9	0.097
9	0.1
9	0.032
9	0.069
9	0.012
9	0.067
9	0.137
9	0.026
9	0.08
9	0.062
9	0.011
9	0.216
9	0.088
9	0.061
9	0.072
9	0.127
9	0.047
9	0.072
9	0.08
9	0.053
9	0.041
9	0.062
9	0.097
9	0.059
9	0.077
9	0.061
9	0.026
9	0.075
9	0.128
9	0.128
9	0.037
9	0.1
9	0.172
9	0.115
9	0.022
9	0.034
9	0.064
9	0.007
9	0.132
9	0.128
9	0.114
9	0.13
9	0.075
9	0.023
9	0.002
9	0.065
9	0.123
9	0.217
9	0.152
9	0.022
9	0.018
9	0.158
9	0.012
9	0.048
9	0.066
9	0.015
9	0.042
9	0.141
9	0.023
9	0.049
9	0.107
9	0.1
9	0.011
9	0.17
9	0.091
9	0.018
9	0.053
9	0.077
9	0.092
9	0.01
9	0.256
9	0.008
9	0.141
9	0.037
9	0.173
9	0.127
9	0.014
9	0.024
9	0.018
9	0.027

## Sheet: Panel B
Panel B
EHD2 siRNA	Scatterplot Track mean speed vs Track duration
Data set #1		Data set #2		Data set #3		Data set #4		Data set #5
Track duration	Track mean speed	Track duration	Track mean speed	Track duration	Track mean speed	Track duration	Track mean speed	Track duration	Track mean speed
252	0.04	300	0.0162	207	0.0397	231	0.0827	216	0.0189
216	0.056	288	0.0817	201	0.0537	159	0.0803	207	0.0558
207	0.0719	207	0.0347	189	0.0807	150	0.0602	177	0.0313
203	0.0897	174	0.1082	174	0.0722	141	0.0869	168	0.1171
203	0.0389	174	0.0701	159	0.0631	129	0.071	168	0.0189
198	0.055	156	0.0891	156	0.0607	120	0.0722	147	0.0727
198	0.0599	153	0.0445	144	0.0796	120	0.0745	135	0.0555
167	0.008	147	0.0723	138	0.0583	111	0.046	132	0.0355
158	0.059	117	0.0181	135	0.0929	111	0.0787	129	0.0468
153	0.0585	114	0.0938	132	0.0886	108	0.0517	123	0.0459
153	0.0649	111	0.0832	126	0.0807	93	0.0789	120	0.0399
153	0.0705	102	0.0174	120	0.0519	84	0.0713	120	0.0776
149	0.0342	99	0.0894	108	0.0587	84	0.0752	108	0.0584
149	0.0541	96	0.0795	108	0.0771	81	0.0478	105	0.075
149	0.031	96	0.0596	105	0.0717	78	0.0632	99	0.0752
140	0.0709	87	0.065	96	0.0583	78	0.0815	93	0.0689
135	0.0368	87	0.0621	93	0.0206	78	0.0871	93	0.0554
135	0.0747	87	0.0945	90	0.0363	75	0.071	84	0.0812
135	0.082	84	0.0791	90	0.0785	75	0.037	81	0.0735
126	0.0667	81	0.1242	87	0.0842	72	0.036	78	0.0556
117	0.0662	78	0.0252	84	0.0962	72	0.0915	75	0.0802
108	0.0438	72	0.0418	81	0.0808	72	0.1076	72	0.012
108	0.0529	69	0.0531	81	0.0687	72	0.0774	72	0.1026
104	0.0586	66	0.0941	78	0.0807	72	0.0889	69	0.1103
104	0.0732	66	0.1004	75	0.0612	69	0.1037	69	0.0721
99	0.0916	66	0.0752	75	0.0508	69	0.0722	66	0.0643
99	0.0717	63	0.113	75	0.0157	66	0.0876	66	0.0475
95	0.039	63	0.1064	72	0.0597	66	0.0848	66	0.029
95	0.0433	63	0.0821	72	0.0354	66	0.0646	63	0.0888
90	0.0634	60	0.0947	69	0.0226	63	0.1024	63	0.0988
90	0.0428	60	0.0758	69	0.0735	63	0.1099	60	0.105
86	0.0825	57	0.083	69	0.0551	60	0.0388	60	0.0819
86	0.0318	57	0.1091	69	0.1036	60	0.0292	57	0.0702
81	0.0116	57	0.037	66	0.0412	60	0.105	57	0.1108
81	0.0519	54	0.1135	66	0.0871	60	0.0662	57	0.0661
77	0.0661	54	0.0947	63	0.0815	60	0.0574	54	0.1293
77	0.0235	48	0.088	63	0.143	60	0.0743	54	0.0833
77	0.0521	48	0.093	60	0.086	60	0.0801	54	0.099
77	0.0607	48	0.1174	60	0.027	57	0.1003	51	0.0931
72	0.098	48	0.0864	60	0.093	57	0.0781	51	0.1009
72	0.0982	48	0.0765	60	0.0295	54	0.0971	51	0.0124
68	0.07	45	0.0228	57	0.0646	54	0.0605	48	0.07
68	0.0516	45	0.0925	57	0.0599	54	0.0782	48	0.0793
68	0.0878	45	0.144	57	0.0776	54	0.0466	48	0.0155
68	0.0582	42	0.0978	57	0.1043	51	0.0722	48	0.0689
68	0.0594	42	0.0209	57	0.0377	51	0.0478	48	0.1171
63	0.0599	42	0.0932	57	0.0825	51	0.0606	48	0.0888
63	0.0892	42	0.0329	51	0.075	51	0.0774	45	0.1328
63	0.0626	42	0.0787	51	0.0912	51	0.0925	42	0.1017
63	0.0906	42	0.1014	51	0.0559	48	0.0674	42	0.0693
63	0.0829	39	0.0513	51	0.0882	48	0.0722	42	0.0717
63	0.0555	39	0.0974	51	0.0731	48	0.0708	39	0.0685
63	0.0606	36	0.1173	51	0.0943	48	0.028	39	0.125
63	0.0618	36	0.0649	48	0.0754	48	0.098	39	0.0748
59	0.0554	36	0.0698	48	0.0643	48	0.0543	39	0.0601
59	0.0602	33	0.1013	48	0.0506	48	0.1018	39	0.043
59	0.0416	33	0.0368	48	0.1017	48	0.0431	39	0.1063
59	0.0321	33	0.0966	48	0.056	45	0.027	39	0.0715
59	0.0502	33	0.0777	48	0.0631	45	0.0307	39	0.0499
59	0.0705	33	0.0775	48	0.0451	45	0.1033	36	0.0879
59	0.0289	33	0.0972	48	0.115	45	0.0952	36	0.1002
59	0.0361	30	0.1347	48	0.065	45	0.1026	36	0.1204
59	0.0312	30	0.0771	45	0.0961	45	0.0747	36	0.0727
59	0.0586	30	0.0635	45	0.0783	45	0.1101	36	0.0847
54	0.0624	30	0.0355	45	0.0499	42	0.0769	36	0.0954
54	0.065	30	0.082	45	0.077	42	0.117	36	0.1115
54	0.0317	30	0.1118	45	0.0999	42	0.0892	33	0.0672
54	0.0509	30	0.0404	42	0.0528	42	0.0619	33	0.0878
54	0.105	27	0.1122	42	0.0826	42	0.0709	33	0.0475
54	0.0717	27	0.059	42	0.0698	39	0.1047	33	0.0836
54	0.0454	27	0.1254	42	0.0596	39	0.0721	33	0.0768
54	0.0687	27	0.0749	42	0.0903	39	0.0797	33	0.1318
54	0.0725	27	0.0785	42	0.0524	39	0.0409	33	0.0583
54	0.0587	27	0.0488	42	0.0471	39	0.151	33	0.07
50	0.0677	27	0.0825	39	0.0606	39	0.0418	33	0.0896
50	0.0538	27	0.0328	39	0.1301	39	0.0669	30	0.0348
50	0.0499	24	0.0662	39	0.0567	39	0.0816	30	0.0367
50	0.0415	24	0.1155	39	0.0758	39	0.0624	30	0.0497
50	0.0726	24	0.0543	39	0.0586	36	0.0832	30	0.0482
50	0.0711	24	0.0937	39	0.0981	36	0.1114	30	0.1338
50	0.0587	24	0.1578	39	0.0628	36	0.1101	30	0.0585
50	0.0534	24	0.0691	36	0.0843	36	0.0628	30	0.076
50	0.0175	24	0.0817	36	0.0466	36	0.1071	30	0.0994
45	0.0687	24	0.011	36	0.029	36	0.0749	30	0.0406
45	0.0699	24	0.0928	36	0.0895	36	0.0914	27	0.1103
45	0.0529	24	0.1128	36	0.1256	36	0.1294	27	0.0086
45	0.1081	24	0.1174	36	0.1132	36	0.0814	27	0.0694
45	0.0876	24	0.1162	36	0.0798	36	0.1017	27	0.0709
45	0.0627	24	0.06	36	0.047	36	0.1118	27	0.0724
45	0.0744	24	0.0671	36	0.0332	36	0.116	27	0.0582
45	0.0614	24	0.0893	36	0.1022	36	0.0851	27	0.1295
45	0.1097	24	0.0657	33	0.0919	33	0.0926	27	0.0756
45	0.0351	24	0.0879	33	0.0554	33	0.0519	27	0.0515
45	0.0453	21	0.0642	33	0.113	33	0.1339	27	0.1272
45	0.04	21	0.0624	33	0.0846	33	0.086	27	0.1084
45	0.0666	21	0.0835	33	0.1018	33	0.0922	27	0.0657
45	0.0538	21	0.0615	33	0.0586	33	0.0955	27	0.0456
45	0.0448	21	0.0982	33	0.1177	33	0.128	27	0.0675
45	0.0577	21	0.0306	33	0.045	33	0.0651	27	0.0801
45	0.0815	21	0.1403	33	0.072	33	0.0723	27	0.1031
41	0.0828	21	0.0874	33	0.0857	33	0.0879	24	0.1232
41	0.0573	21	0.0352	33	0.1264	33	0.1221	24	0.1157
41	0.0637	21	0.0467	33	0.0426	33	0.0706	24	0.0976
41	0.0624	21	0.0561	33	0.0542	33	0.1115	24	0.0664
41	0.046	21	0.0323	33	0.0763	33	0.0608	24	0.0919
41	0.0591	18	0.1335	33	0.0319	33	0.0736	24	0.0599
41	0.0865	18	0.0656	33	0.1003	33	0.0926	24	0.1558
41	0.0363	18	0.1099	33	0.0958	30	0.0827	24	0.0485
41	0.0884	18	0.1655	33	0.0318	30	0.0677	24	0.127
41	0.0573	18	0.0616	33	0.0771	30	0.0633	21	0.1587
41	0.047	18	0.0872	33	0.174	30	0.1222	21	0.114
41	0.0555	18	0.1103	33	0.0952	30	0.078	21	0.0499
41	0.048	18	0.0648	33	0.0675	30	0.0885	21	0.0803
41	0.0578	18	0.1017	30	0.0792	30	0.1384	21	0.0882
41	0.0556	18	0.0712	30	0.033	30	0.089	21	0.0327
41	0.0873	18	0.0812	30	0.0887	30	0.079	21	0.0489
41	0.0747	18	0.1576	30	0.1046	30	0.0969	21	0.0514
41	0.0473	18	0.0409	30	0.0894	30	0.1532	21	0.1756
41	0.0449	18	0.0075	30	0.0933	30	0.0388	21	0.0272
41	0.0623	18	0.0859	30	0.1672	30	0.1167	21	0.1243
36	0.0226	18	0.0665	30	0.0387	30	0.0522	21	0.0471
36	0.027	18	0.0618	30	0.0691	30	0.0795	21	0.0651
36	0.0076	18	0.0781	30	0.0941	30	0.0856	21	0.0349
36	0.0689	18	0.0457	30	0.1419	30	0.1036	18	0.1213
36	0.0939	18	0.1244	30	0.1001	30	0.0723	18	0.0661
36	0.0351	18	0.1078	30	0.0389	30	0.1174	18	0.0235
36	0.1141	18	0.0892	30	0.1239	27	0.0842	18	0.0896
36	0.0403	18	0.0854	30	0.0278	27	0.1187	18	0.0271
36	0.0294	18	0.1092	30	0.073	27	0.0984	18	0.0966
36	0.106	18	0.0932	30	0.0168	27	0.131	18	0.0542
36	0.0905	18	0.1151	30	0.053	27	0.0943	18	0.0998
36	0.0706	18	0.0946	30	0.0619	27	0.1406	18	0.0515
36	0.0206	18	0.1053	27	0.1059	27	0.0815	18	0.0707
36	0.0963	18	0.0818	27	0.0437	27	0.0322	18	0.079
36	0.0874	18	0.0769	27	0.086	27	0.1327	18	0.0354
36	0.0242	18	0.15	27	0.092	27	0.0303	18	0.0417
36	0.0673	15	0.1525	27	0.0445	27	0.1032	18	0.0616
36	0.0967	15	0.1061	27	0.0696	24	0.0693	18	0.1121
32	0.0461	15	0.069	27	0.087	24	0.1429	18	0.0943
32	0.0487	15	0.2133	27	0.099	24	0.151	18	0.0144
32	0.0395	15	0.093	27	0.0973	24	0.0693	18	0.1002
32	0.0822	15	0.0885	27	0.0624	24	0.0617	18	0.1903
32	0.0841	15	0.0877	27	0.0563	24	0.1165	15	0.0179
32	0.0607	15	0.0927	27	0.0626	24	0.0947	15	0.0476
32	0.1205	15	0.1066	24	0.0926	24	0.0601	15	0.0645
32	0.0909	15	0.2173	24	0.0704	24	0.0496	15	0.0575
32	0.05	15	0.1002	24	0.061	24	0.0917	15	0.0497
32	0.1002	15	0.1182	24	0.0646	24	0.1322	15	0.0932
32	0.0263	15	0.0611	24	0.1018	24	0.0639	15	0.1587
32	0.0495	15	0.137	24	0.1069	24	0.0424	15	0.0645
32	0.0992	15	0.0767	24	0.0337	24	0.0645	15	0.0941
32	0.0599	15	0.0863	24	0.0815	24	0.1414	15	0.0822
32	0.0627	15	0.0159	24	0.0194	24	0.0827	15	0.0646
32	0.0524	15	0.1032	24	0.033	24	0.0924	15	0.0889
32	0.0734	15	0.139	24	0.0401	24	0.1473	15	0.0203
32	0.0607	15	0.0291	24	0.1075	21	0.1196	15	0.0984
32	0.0736	15	0.1922	24	0.0538	21	0.109	15	0.1496
32	0.0593	15	0.0752	24	0.1059	21	0.0279	15	0.1234
32	0.0858	15	0.0488	24	0.0668	21	0.1538	12	0.0542
27	0.035	15	0.148	24	0.0679	21	0.0487	12	0.0792
27	0.0705	12	0.1845	24	0.1078	21	0.076	12	0.0462
27	0.0429	12	0.0755	24	0.0598	21	0.0909	12	0.0517
27	0.0959	12	0.0996	24	0.0825	21	0.0846	12	0.067
27	0.0763	12	0.029	24	0.1124	21	0.1673	12	0.1518
27	0.0802	12	0.0817	24	0.1197	21	0.0862	12	0.0714
27	0.0644	12	0.1031	24	0.1133	21	0.074	12	0.0358
27	0.0727	12	0.0275	24	0.0942	21	0.0498	12	0.0925
27	0.0596	12	0.0566	24	0.066	21	0.1339	12	0.0976
27	0.0642	12	0.0047	24	0.0767	21	0.0664	12	0.0463
27	0.0679	12	0.0747	24	0.1048	21	0.1214	12	0.024
27	0.0375	12	0.014	24	0.0244	21	0.0938	12	0.0584
27	0.1373	12	0.0478	21	0.1038	21	0.0544	12	0.0994
27	0.0257	12	0.188	21	0.1274	21	0.1355	12	0.1624
27	0.0278	12	0.069	21	0.0257	21	0.0489	12	0.0332
27	0.0931	12	0.0798	21	0.0864	21	0.1371	12	0.0339
27	0.0838	12	0.0326	21	0.0461	21	0.1241	12	0.0422
27	0.04	12	0.0637	21	0.0711	21	0.0888	12	0.0419
27	0.0429	12	0.0564	21	0.1001	21	0.0907	12	0.0847
27	0.076	12	0.1673	21	0.1274	21	0.0844	12	0.1551
27	0.034	12	0.0756	21	0.1421	21	0.171	12	0.0595
27	0.0622	12	0.0276	21	0.0953	21	0.0759	12	0.043
27	0.0599	12	0.1854	21	0.0907	21	0.137	12	0.0254
27	0.0567	12	0.193	21	0.0432	21	0.1161	12	0.0543
23	0.0319	12	0.1605	21	0.1139	21	0.1178	12	0.0795
23	0.0485	12	0.0494	21	0.1093	21	0.0849	12	0.039
23	0.0404	12	0.0676	21	0.0765	21	0.085	12	0.0684
23	0.109	12	0.068	21	0.0758	21	0.0615	12	0.1895
23	0.0999	12	0.0172	21	0.1126	21	0.0708	9	0.117
23	0.0702	12	0.072	21	0.0865	18	0.0457	9	0.1182
23	0.048	12	0.0151	21	0.0825	18	0.1426	9	0.0688
23	0.0344	12	0.2882	21	0.042	18	0.101	9	0.027
23	0.0276	12	0.0265	21	0.1159	18	0.0521	9	0.0316
23	0.0485	12	0.1163	21	0.0609	18	0.0441	9	0.1338
23	0.0953	12	0.1865	21	0.0617	18	0.1089	9	0.0543
23	0.0847	12	0.1695	21	0.0957	18	0.0609	9	0.0593
23	0.0529	12	0.0452	21	0.0961	18	0.0896	9	0.1475
23	0.106	12	0.015	21	0.1251	18	0.0531	9	0.105
23	0.0755	9	0.0936	21	0.1427	18	0.0919	9	0.1153
23	0.0544	9	0.0837	21	0.1364	18	0.0598	9	0.0965
23	0.0152	9	0.0543	21	0.0669	18	0.0413	9	0.0655
23	0.0816	9	0.1944	21	0.094	18	0.0822	9	0.1612
23	0.046	9	0.0472	21	0.1437	18	0.1126	9	0.155
23	0.0266	9	0.0409	21	0.1052	18	0.1759	9	0.029
23	0.0781	9	0.1686	21	0.0568	18	0.092	9	0.0519
23	0.0845	9	0.0971	18	0.1382	18	0.1647	9	0.2053
23	0.0721	9	0.0847	18	0.0677	18	0.1021	9	0.1524
23	0.0991	9	0.0659	18	0.0313	18	0.1191	9	0.1814
23	0.0689	9	0.0996	18	0.0071	18	0.1317	9	0.0989
23	0.0475	9	0.0738	18	0.029	18	0.0976	9	0.1566
23	0.0441	9	0.1546	18	0.1184	18	0.1277	9	0.0533
23	0.1248	9	0.0988	18	0.1183	18	0.1338	9	0.1018
23	0.1042	9	0.0799	18	0.0552	18	0.1213	9	0.1076
23	0.123	9	0.0338	18	0.0626	18	0.1009	9	0.0213
23	0.0343	9	0.0612	18	0.134	18	0.0643	9	0.0686
23	0.0774	9	0.1262	18	0.1374	18	0.0877	9	0.0456
23	0.0686	9	0.1295	18	0.0653	18	0.1306	9	0.0975
18	0.107	9	0.0371	18	0.0954	18	0.1733	9	0.2263
18	0.0546	9	0.1321	18	0.0816	18	0.0338	9	0.1112
18	0.0981	9	0.0865	18	0.1261	18	0.0693	9	0.148
18	0.0774	9	0.1799	18	0.047	18	0.1023	9	0.1016
18	0.1753	9	0.0215	18	0.1367	18	0.0882	9	0.1309
18	0.0479	9	0.1283	18	0.1464	18	0.0444	9	0.0929
18	0.0796	9	0.2143	18	0.0978	15	0.1217	9	0.0578
18	0.1464	9	0.0449	18	0.1308	15	0.0648	9	0.0893
18	0.1089	9	0.1277	18	0.0889	15	0.1961	9	0.0919
18	0.0325	9	0.1149	18	0.01	15	0.1224	9	0.1596
18	0.0681	9	0.1739	18	0.0423	15	0.0847	9	0.097
18	0.0104	9	0.1051	18	0.0993	15	0.1615
18	0.1481	9	0.0603	18	0.0992	15	0.0682
18	0.0726	9	0.0706	18	0.0832	15	0.0436
18	0.0446	9	0.1521	18	0.102	15	0.1059
18	0.0562	9	0.0989	18	0.0544	15	0.064
18	0.0644	9	0.0195	18	0.1476	15	0.1488
18	0.0663	9	0.0335	18	0.1358	15	0.034
18	0.0353	9	0.1158	18	0.043	15	0.1073
18	0.0429	9	0.0876	18	0.0287	15	0.1484
18	0.0743	9	0.1007	18	0.073	15	0.076
18	0.0831	9	0.0692	18	0.06	15	0.1098
18	0.0789			18	0.0208	15	0.0546
18	0.0442			18	0.039	15	0.1039
18	0.0712			15	0.1134	15	0.0699
18	0.0994			15	0.0428	15	0.0378
18	0.0364			15	0.0749	15	0.152
18	0.119			15	0.0859	15	0.0791
18	0.0447			15	0.0733	15	0.1024
18	0.0598			15	0.0462	15	0.0757
18	0.0461			15	0.0602	15	0.0711
18	0.0658			15	0.1429	15	0.1316
18	0.0795			15	0.0065	15	0.078
18	0.0362			15	0.0959	15	0.0778
18	0.0487			15	0.134	15	0.1057
18	0.0902			15	0.0764	15	0.0674
18	0.0526			15	0.1304	15	0.1137
18	0.0904			15	0.0382	15	0.1036
18	0.0263			15	0.0502	15	0.0688
18	0.0323			15	0.1326	15	0.1863
18	0.0445			15	0.0575	15	0.0906
14	0.0875			15	0.119	15	0.1178
14	0.0736			15	0.0807	15	0.1089
14	0.0774			15	0.1343	15	0.071
14	0.0835			15	0.0782	15	0.1108
14	0.0995			15	0.0563	15	0.1219
14	0.0309			15	0.0331	15	0.1124
14	0.1179			15	0.0668	15	0.0705
14	0.0369			15	0.0737	15	0.1478
14	0.0445			15	0.0879	15	0.0819
14	0.045			15	0.1108	15	0.0916
14	0.0219			15	0.0759	12	0.1419
14	0.0432			15	0.1219	12	0.1169
14	0.0653			15	0.1211	12	0.1283
14	0.1186			15	0.1233	12	0.1236
14	0.1147			15	0.0547	12	0.1309
14	0.0616			15	0.0508	12	0.1333
14	0.0434			15	0.0656	12	0.0844
14	0.0716			15	0.0674	12	0.0098
14	0.0904			15	0.0751	12	0.1301
14	0.0685			15	0.0468	12	0.1124
14	0.0618			15	0.0776	12	0.0758
14	0.049			12	0.1711	12	0.0975
14	0.1047			12	0.056	12	0.0744
14	0.0246			12	0.0115	12	0.1169
14	0.0643			12	0.0683	12	0.0909
14	0.0907			12	0.071	12	0.0649
14	0.1189			12	0.0914	12	0.0434
14	0.1201			12	0.0601	12	0.0451
14	0.0492			12	0.1193	12	0.0809
14	0.0978			12	0.11	12	0.0504
14	0.0066			12	0.017	12	0.0203
14	0.0588			12	0.0716	12	0.1822
14	0.0577			12	0.0804	12	0.0775
14	0.0927			12	0.0518	12	0.0423
14	0.0173			12	0.0732	12	0.0565
14	0.0695			12	0.0062	12	0.132
14	0.0272			12	0.0373	12	0.0491
14	0.1035			12	0.0356	12	0.1472
14	0.1767			12	0.0431	12	0.0739
14	0.0612			12	0.0637	12	0.0518
14	0.0442			12	0.0329	12	0.1903
14	0.0789			12	0.0405	12	0.0465
14	0.0228			12	0.0417	12	0.0211
14	0.0374			12	0.0396	12	0.0661
14	0.0218			12	0.1492	12	0.0245
9	0.0498			12	0.0651	12	0.0709
9	0.0134			12	0.2283	12	0.1069
9	0.1411			12	0.0513	12	0.1284
9	0.0213			12	0.0387	12	0.0458
9	0.119			12	0.0875	12	0.1287
9	0.0795			12	0.1613	12	0.0766
9	0.0671			12	0.0353	12	0.09
9	0.0933			12	0.0495	12	0.1067
9	0.0595			12	0.0293	12	0.0671
9	0.0705			12	0.0944	12	0.0603
9	0.0165			12	0.0806	12	0.0944
9	0.192			12	0.0411	12	0.0594
9	0.1263			12	0.0287	12	0.0312
9	0.0722			12	0.1559	9	0.1804
9	0.0558			12	0.0199	9	0.0547
9	0.0833			12	0.0769	9	0.2082
9	0.0118			12	0.1754	9	0.131
9	0.1069			12	0.1393	9	0.2598
9	0.0908			12	0.0582	9	0.1683
9	0.022			12	0.0615	9	0.1365
9	0.0348			12	0.0948	9	0.0445
9	0.0186			12	0.0758	9	0.0945
9	0.1301			12	0.0788	9	0.2065
9	0.0821			12	0.0389	9	0.0977
9	0.1955			12	0.1484	9	0.0632
9	0.1163			12	0.0726	9	0.1027
9	0.1493			12	0.1107	9	0.1179
9	0.036			12	0.0504	9	0.1745
9	0.0416			9	0.0803	9	0.0752
9	0.1607			9	0.0232	9	0.1438
9	0.1108			9	0.0824	9	0.0613
9	0.0316			9	0.1165	9	0.0828
9	0.0787			9	0.0881	9	0.1847
9	0.0721			9	0.1514	9	0.0871
9	0.1447			9	0.0765	9	0.0752
9	0.1324			9	0.1189	9	0.1872
9	0.1026			9	0.119	9	0.0769
9	0.0556			9	0.1796	9	0.1457
9	0.0466			9	0.2129	9	0.1519
9	0.05			9	0.0441	9	0.0364
9	0.0763			9	0.0657	9	0.1535
9	0.093			9	0.1227	9	0.0178
9	0.1122			9	0.083	9	0.1235
9	0.0315			9	0.0585	9	0.205
9	0.0444			9	0.0544	9	0.1681
9	0.0455			9	0.1051	9	0.1183
9	0.0511			9	0.048	9	0.1297
9	0.0795			9	0.0486	9	0.1933
9	0.0767			9	0.2324	9	0.0843
9	0.0249			9	0.0913	9	0.1589
9	0.1476			9	0.0595	9	0.0854
9	0.0379			9	0.0253	9	0.1807
9	0.0952			9	0.093	9	0.1947
9	0.0882			9	0.0724	9	0.0792
9	0.1828			9	0.0294	9	0.1367
9	0.0204			9	0.1385	9	0.1338
9	0.0606			9	0.0464	9	0.0612
9	0.1317			9	0.0733	9	0.076
9	0.1019			9	0.1109	9	0.1848
9	0.0778			9	0.0946	9	0.1159
9	0.0569			9	0.0165	9	0.0649
9	0.056			9	0.0985	9	0.1753
9	0.0465			9	0.045	9	0.0273
9	0.0792			9	0.0079	9	0.1961
9	0.098			9	0.1237	9	0.0332
9	0.097			9	0.0455	9	0.1131
9	0.0445			9	0.1279	9	0.1287
9	0.0603			9	0.0536	9	0.1374
9	0.0448			9	0.1511	9	0.1586
9	0.1363			9	0.0015	9	0.1151
				9	0.0889	9	0.203
				9	0.0877	9	0.1035
				9	0.0479	9	0.0696
				9	0.1623	9	0.1514
				9	0.1251	9	0.2248
				9	0.1327	9	0.0873
				9	0.0113	9	0.1394
				9	0.0332	9	0.1549
				9	0.0768	9	0.0786
				9	0.0403	9	0.173
				9	0.0294	9	0.0372
				9	0.0695	9	0.0621
				9	0.0713	9	0.0441
				9	0.04	9	0.0966
				9	0.0767	9	0.181
				9	0.1011	9	0.1083
				9	0.142	9	0.0932
				9	0.0843	9	0.1408
				9	0.1692	9	0.1145
				9	0.0211	9	0.0695
				9	0.1515	9	0.1292
				9	0.077	9	0.0532
				9	0.0305	9	0.0844
				9	0.0276	9	0.0927
				9	0.0296	9	0.0562
				9	0.1633	9	0.1518
				9	0.0912
				9	0.1707
				9	0.2358
				9	0.0595
				9	0.1738
				9	0.0659
				9	0.0096
				9	0.0464
				9	0.194
				9	0.014

## Sheet: Panel C
Panel C
Bodipy-LacCer	Frequency of Track mean speed
	Track mean speed
Track druation	0-0,05					0,051-0,1					0,101-0,15					0,151-0,2						0,21-0,25
0-10 s	17.0213	18.8679	30.2326	23.0769	16.129	34.0425	39.6226	32.5581	30.7692	37.0968	27.6596	28.3019	27.907	26.9231	27.4194	14.8936	9.43396	4.65116	15.3846	12.9032	6.38298	3.77359	4.65116	3.84615	6.45161
11-20 s	25.3012	21.1679	20.9677	32.8571	16.9118	39.759	45.9854	41.9355	40	44.1176	24.0964	22.6277	30.6452	21.4286	31.6177	8.43374	8.0292	3.22581	5.71429	5.88235	2.40964	2.18978	3.22581	0	1.47059
21-30 s	20.9677	10.6796	27.027	18.6046	15.5844	50	56.3107	37.8378	48.8372	38.961	25.8065	31.068	27.027	30.2326	41.5584	3.22581	1.94175	8.10811	2.32558	2.5974	0	0	0	0	1.2987
31-40 s	25	11.6279	13.0435	0	8.33333	55	46.5116	69.5652	50	50	20	39.5349	17.3913	50	41.6667	0	2.32558	0	0	0	0	0	0	0	0
41-50 s	13.3333	2.77778	22.2222	55.5556	13.3333	66.6667	61.1111	66.6667	44.4444	66.6667	20	36.1111	11.1111	0	20	0	0	0	0	0	0	0	0	0	0
51-75 s	29.4118	13.1579	25.9259	47.8261	16.6667	64.7059	50	55.5556	43.4783	61.1111	5.88235	36.8421	18.5185	8.69565	19.4444	0	0	0	0	2.77778	0	0	0	0	0
76-100 s	28.5714	15.3846	16.6667	37.5	5.26316	71.4286	61.5385	75	50	73.6842	0	23.0769	8.33333	12.5	21.0526	0	0	0	0	0	0	0	0	0	0
101-150 s	55.5556	5.26316	40	66.6667	40	44.4444	89.4737	60	33.3333	60	0	5.26316	0	0	0	0	0	0	0	0	0	0	0	0	0
151-200 s	0	0	33.3333	100	0	100	100	66.6667	0	100	0	0	0	0	0	0	0	0	0	0	0	0	0	0	0
201-300 s	71.4286	100	50	85.7143	50	28.5714	0	50	14.2857	50	0	0	0	0	0	0	0	0	0	0	0	0	0	0	0

## Sheet: Panel D
Panel D
Bodipy-LacCer	Scatterplot Track mean speed vs Track duration
Data set #1		Data set #2		Data set #3		Data set #4		Data set #5
Track duration	Track mean speed	Track duration	Track mean speed	Track duration	Track mean speed	Track duration	Track mean speed	Track duration	Track mean speed
300	0.0752	300	0.023	300	0.0691	300	0.0193	300	0.0791
300	0.0336	300	0.0123	300	0.035	300	0.0164	264	0.0225
300	0.0152	300	0.0147	300	0.0554	279	0.0428	186	0.0553
300	0.0283	168	0.0787	228	0.0195	267	0.0526	177	0.0597
297	0.0138	150	0.0977	210	0.0438	258	0.0314	126	0.0327
222	0.0521	147	0.0747	207	0.0633	216	0.016	123	0.0822
207	0.0351	144	0.0429	174	0.0727	204	0.045	114	0.0661
174	0.0837	135	0.0591	168	0.0402	189	0.0317	111	0.0968
174	0.0708	129	0.0561	162	0.0752	126	0.0613	105	0.0348
165	0.074	126	0.0919	162	0.053	114	0.0444	99	0.1032
165	0.0623	126	0.0514	162	0.0211	96	0.0684	96	0.0608
147	0.0733	120	0.0853	159	0.0862	96	0.0726	96	0.0731
144	0.0769	120	0.0731	123	0.0304	96	0.1057	93	0.098
144	0.0618	120	0.0855	123	0.088	96	0.0564	90	0.0827
141	0.0159	117	0.0801	120	0.0479	90	0.0472	90	0.0708
135	0.0492	117	0.0825	117	0.0655	84	0.0342	90	0.081
132	0.017	114	0.0506	105	0.0703	78	0.0134	87	0.1102
132	0.0486	114	0.0922	99	0.0983	78	0.0577	87	0.0609
120	0.0682	108	0.0714	96	0.0587	75	0.0549	87	0.0295
111	0.0196	105	0.0779	87	0.1208	75	0.0257	84	0.0992
96	0.081	105	0.1051	84	0.0571	75	0.0482	81	0.1075
96	0.0685	105	0.0813	84	0.0662	72	0.0327	81	0.112
87	0.0533	102	0.0841	84	0.0712	69	0.0606	81	0.08
84	0.0882	99	0.0924	84	0.0447	69	0.0492	81	0.0814
84	0.0652	96	0.1083	81	0.0548	66	0.0854	78	0.0727
81	0.0294	96	0.1061	81	0.0502	66	0.027	78	0.0674
78	0.0174	96	0.057	81	0.0757	66	0.1127	78	0.055
75	0.0392	93	0.0812	81	0.0413	66	0.0745	78	0.0741
69	0.0657	90	0.1063	78	0.0599	63	0.0149	75	0.0589
66	0.0919	90	0.0753	75	0.0749	60	0.0777	72	0.0363
63	0.0828	87	0.0959	75	0.0703	60	0.0833	72	0.1007
63	0.0596	84	0.0932	75	0.0831	60	0.0404	72	0.0388
63	0.1162	78	0.0991	72	0.0293	57	0.0155	69	0.0828
63	0.069	78	0.0467	72	0.0835	57	0.041	69	0.0824
60	0.0795	78	0.0928	72	0.0824	54	0.0521	66	0.0765
60	0.0866	78	0.0247	72	0.0826	54	0.0412	66	0.08
60	0.0991	75	0.0741	69	0.0362	54	0.0534	66	0.1071
54	0.0271	75	0.0973	69	0.0913	51	0.0385	66	0.1244
54	0.0467	75	0.1125	66	0.0841	51	0.0585	66	0.0996
54	0.025	75	0.1089	66	0.0822	51	0.1243	63	0.0432
51	0.0203	72	0.1132	66	0.0847	51	0.0713	63	0.0231
51	0.0967	69	0.0517	66	0.0598	48	0.1007	63	0.0823
51	0.0962	69	0.0875	66	0.0248	45	0.0501	63	0.1088
51	0.0795	69	0.1372	63	0.0791	45	0.0397	60	0.0809
48	0.0675	69	0.1065	60	0.0456	45	0.1184	60	0.0515
48	0.1489	66	0.1328	60	0.102	45	0.0553	60	0.0562
45	0.0719	66	0.1079	60	0.1259	45	0.1139	60	0.0719
45	0.0718	66	0.1278	60	0.0965	42	0.0697	60	0.0943
45	0.018	66	0.0779	57	0.0963	42	0.0729	57	0.0663
45	0.0814	63	0.0847	54	0.1079	42	0.0699	57	0.1609
45	0.1095	63	0.1244	54	0.0432	39	0.0296	57	0.0878
45	0.0825	63	0.1011	54	0.0916	39	0.0844	57	0.0669
45	0.0848	60	0.0446	54	0.0396	36	0.0881	57	0.1086
42	0.0991	60	0.0906	54	0.0357	36	0.0196	57	0.0115
42	0.087	60	0.0671	51	0.1103	36	0.1027	54	0.0831
42	0.0486	60	0.0317	51	0.1021	36	0.0691	54	0.0565
42	0.1032	60	0.0907	48	0.0808	33	0.0592	54	0.0932
42	0.0778	60	0.0821	48	0.0524	33	0.0912	54	0.0887
42	0.0849	57	0.0132	45	0.0514	33	0.0427	51	0.0664
39	0.0845	57	0.0189	45	0.0489	33	0.1128	51	0.0655
39	0.0495	57	0.0601	45	0.1066	30	0.105	51	0.0986
39	0.111	57	0.1091	45	0.0649	30	0.0547	51	0.1088
39	0.0178	57	0.1051	42	0.0383	30	0.1131	51	0.1224
39	0.0418	54	0.0861	42	0.093	30	0.0822	51	0.0161
36	0.0636	54	0.0837	42	0.0872	30	0.0774	48	0.0663
36	0.0545	54	0.0694	39	0.0442	30	0.0851	48	0.0514
36	0.0656	54	0.0927	39	0.0986	30	0.0438	48	0.0815
36	0.084	51	0.0658	39	0.0515	30	0.041	48	0.1019
36	0.0351	51	0.1098	39	0.0702	27	0.0381	48	0.0208
36	0.1009	51	0.1485	39	0.0988	27	0.0916	45	0.0311
36	0.0454	51	0.0743	36	0.0503	27	0.0709	45	0.096
36	0.0661	51	0.0979	36	0.0974	27	0.0287	45	0.0996
33	0.0577	51	0.1005	36	0.0985	27	0.1436	45	0.1171
33	0.0668	51	0.044	36	0.1215	27	0.1003	45	0.0723
33	0.0539	48	0.0888	36	0.0638	27	0.0392	45	0.0937
33	0.1485	48	0.1044	36	0.0819	27	0.1449	45	0.0795
33	0.0714	48	0.0815	36	0.1326	27	0.0842	45	0.0928
33	0.1053	48	0.0873	33	0.0832	24	0.0981	42	0.1144
33	0.0981	48	0.0943	33	0.0528	24	0.0751	42	0.0865
30	0.1334	48	0.0567	33	0.0959	24	0.0739	39	0.0829
30	0.0776	48	0.0953	33	0.0642	24	0.112	39	0.092
30	0.0251	48	0.1417	33	0.0358	24	0.0366	39	0.0971
30	0.138	48	0.0986	33	0.0667	24	0.1189	39	0.0447
30	0.0893	48	0.0444	33	0.0443	24	0.0906	39	0.1271
30	0.1199	45	0.1013	33	0.1219	24	0.1145	39	0.0585
30	0.0756	45	0.0575	33	0.087	24	0.0898	36	0.0707
30	0.0472	45	0.0875	33	0.1254	24	0.1247	36	0.127
30	0.0887	45	0.0894	33	0.0817	24	0.1449	36	0.1205
30	0.0742	45	0.0896	30	0.0595	24	0.0763	36	0.0746
27	0.1278	45	0.1304	30	0.1317	21	0.1211	36	0.1459
27	0.0803	45	0.0906	30	0.0703	21	0.1196	36	0.0735
27	0.057	45	0.0925	30	0.0489	21	0.1339	36	0.0794
27	0.114	45	0.1166	30	0.0928	21	0.05	36	0.0605
27	0.0216	45	0.0822	30	0.0372	21	0.0618	36	0.0737
27	0.0891	45	0.1162	30	0.1182	21	0.0919	33	0.0928
27	0.0799	45	0.1047	30	0.1036	21	0.0272	33	0.0896
27	0.0119	45	0.0855	30	0.0657	21	0.0904	33	0.1391
27	0.114	42	0.1016	30	0.0189	21	0.0719	33	0.1152
27	0.0599	42	0.0955	27	0.088	21	0.0803	33	0.1022
27	0.1482	42	0.1199	27	0.1526	21	0.1081	33	0.1133
27	0.1662	42	0.0745	27	0.1061	21	0.0793	33	0.1069
27	0.0931	42	0.0723	27	0.1283	21	0.0733	33	0.0312
27	0.0764	42	0.0995	27	0.055	21	0.1665	33	0.1089
27	0.0827	42	0.1472	27	0.0505	18	0.0645	30	0.0677
27	0.092	42	0.0815	27	0.14	18	0.141	30	0.0673
27	0.046	42	0.1167	27	0.0756	18	0.1079	30	0.0672
27	0.1377	42	0.082	27	0.0387	18	0.0824	30	0.1069
24	0.0508	42	0.1015	27	0.0859	18	0.0681	30	0.1302
24	0.0499	42	0.1084	24	0.0304	18	0.0825	30	0.1472
24	0.0574	42	0.0919	24	0.1339	18	0.1065	27	0.1057
24	0.0797	39	0.1184	24	0.0797	18	0.0474	27	0.1315
24	0.0683	39	0.1045	24	0.0424	18	0.0251	27	0.0348
24	0.0682	39	0.0914	24	0.1004	18	0.0687	27	0.1063
24	0.0943	39	0.0561	24	0.1529	18	0.0768	27	0.034
24	0.114	39	0.1016	24	0.0852	18	0.0526	27	0.0448
24	0.0877	39	0.1024	24	0.0452	18	0.1162	27	0.1234
24	0.0181	39	0.0401	24	0.0992	18	0.0351	27	0.0877
24	0.1533	39	0.0779	21	0.0852	18	0.0628	27	0.0541
24	0.0699	39	0.0653	21	0.1613	18	0.0322	27	0.1284
24	0.1058	39	0.1141	21	0.0478	18	0.1607	27	0.1134
24	0.1179	39	0.1061	21	0.1091	18	0.0464	27	0.0401
24	0.034	39	0.0973	21	0.0685	18	0.0689	27	0.1052
24	0.1271	39	0.1124	21	0.1111	15	0.0116	27	0.0449
24	0.0468	39	0.0967	21	0.1022	15	0.0411	27	0.1009
24	0.0466	36	0.1178	21	0.0253	15	0.1121	27	0.0682
24	0.0883	36	0.0887	18	0.0591	15	0.0448	27	0.1158
24	0.0757	36	0.089	18	0.1604	15	0.1132	27	0.0881
21	0.0864	36	0.0208	18	0.1276	15	0.1016	27	0.1287
21	0.1146	36	0.0402	18	0.1348	15	0.013	27	0.0727
21	0.0805	36	0.0919	18	0.1011	15	0.0911	27	0.124
21	0.0487	36	0.1136	18	0.1272	15	0.0326	27	0.05
21	0.0636	36	0.1703	18	0.1711	15	0.1381	27	0.1433
21	0.0417	36	0.1037	18	0.0929	15	0.0789	24	0.1125
21	0.0731	36	0.1191	18	0.0735	15	0.0693	24	0.1779
21	0.1217	36	0.1045	18	0.057	15	0.0336	24	0.0066
21	0.0446	36	0.1137	18	0.0335	15	0.1093	24	0.011
21	0.128	33	0.0606	18	0.0979	15	0.0294	24	0.0755
21	0.0909	33	0.1117	18	0.1462	15	0.0713	24	0.1272
21	0.097	33	0.0907	15	0.0389	15	0.0719	24	0.0557
21	0.1086	33	0.1186	15	0.1006	15	0.1636	24	0.0953
21	0.0617	33	0.0726	15	0.0427	15	0.0676	24	0.0309
18	0.0686	33	0.0575	15	0.1261	12	0.0455	24	0.1224
18	0.0851	33	0.0651	15	0.1152	12	0.0338	24	0.1335
18	0.0382	33	0.0745	15	0.2122	12	0.0424	24	0.1073
18	0.0414	33	0.0904	15	0.134	12	0.0692	24	0.1421
18	0.0675	33	0.1176	15	0.0706	12	0.0571	24	0.0741
18	0.0955	33	0.037	15	0.0899	12	0.1219	24	0.0542
18	0.0608	33	0.0736	15	0.0939	12	0.1537	24	0.1528
18	0.1115	33	0.0683	15	0.0079	12	0.0991	24	0.1345
18	0.128	33	0.0124	15	0.0565	12	0.0326	24	0.144
18	0.0572	33	0.0681	15	0.1304	12	0.1056	24	0.0974
18	0.116	33	0.084	15	0.0497	12	0.0129	24	0.111
18	0.0565	33	0.1329	15	0.0729	12	0.0757	24	0.1169
18	0.1263	30	0.0728	15	0.11	12	0.0877	21	0.0687
18	0.1426	30	0.1449	15	0.1505	12	0.0747	21	0.0935
18	0.099	30	0.1002	15	0.0549	12	0.1221	21	0.0942
18	0.1435	30	0.1211	15	0.075	12	0.1075	21	0.0704
15	0.0882	30	0.0441	15	0.0949	12	0.0265	21	0.101
15	0.069	30	0.0742	15	0.1472	12	0.094	21	0.0818
15	0.0696	30	0.1282	15	0.0312	12	0.1624	21	0.0762
15	0.0752	30	0.0864	15	0.0785	12	0.0593	21	0.0812
15	0.0486	30	0.0451	15	0.1286	12	0.0717	21	0.1143
15	0.0668	30	0.0929	15	0.0637	12	0.0847	21	0.0949
15	0.0691	30	0.0838	15	0.0758	12	0.0345	21	0.2339
15	0.1373	30	0.1063	12	0.0392	12	0.032	21	0.0652
15	0.0759	30	0.0657	12	0.0717	12	0.0606	21	0.0851
15	0.0844	30	0.1225	12	0.034	12	0.1397	21	0.1012
15	0.0624	30	0.0461	12	0.0663	12	0.0284	21	0.0787
15	0.0429	30	0.0538	12	0.0785	12	0.08	21	0.1019
15	0.0731	30	0.0725	12	0.0772	12	0.0782	21	0.0444
15	0.0256	30	0.076	12	0.1328	12	0.1316	21	0.0541
15	0.0327	27	0.0848	12	0.1333	12	0.0317	21	0.0923
15	0.0191	27	0.0453	12	0.04	12	0.0153	21	0.083
15	0.1199	27	0.0848	12	0.0578	9	0.0832	21	0.0701
15	0.1205	27	0.118	12	0.0766	9	0.0813	21	0.101
15	0.081	27	0.1362	12	0.0619	9	0.1063	21	0.1214
15	0.0308	27	0.1078	12	0.1225	9	0.1474	21	0.1072
15	0.0994	27	0.1373	12	0.1031	9	0.0375	21	0.052
15	0.1656	27	0.1389	12	0.0886	9	0.1399	21	0.0052
15	0.1534	27	0.1605	12	0.0988	9	0.1491	21	0.0154
15	0.0134	27	0.0623	12	0.043	9	0.0585	18	0.082
15	0.0329	27	0.0987	12	0.0435	9	0.162	18	0.0287
15	0.1032	27	0.0919	12	0.0664	9	0.1392	18	0.1108
15	0.1196	27	0.1161	12	0.0126	9	0.0326	18	0.0989
15	0.0809	27	0.0689	12	0.0422	9	0.1168	18	0.1172
15	0.1725	27	0.093	12	0.1023	9	0.1111	18	0.107
15	0.026	27	0.0998	12	0.2114	9	0.1797	18	0.0788
15	0.107	27	0.1227	9	0.108	9	0.0555	18	0.102
15	0.1142	27	0.0432	9	0.082	9	0.1619	18	0.1205
15	0.0288	27	0.0463	9	0.0303	9	0.1002	18	0.1377
15	0.1263	27	0.0574	9	0.1177	9	0.0137	18	0.1181
15	0.0918	27	0.0899	9	0.0336	9	0.0964	18	0.0934
15	0.0349	27	0.1095	9	0.0295	9	0.2114	18	0.1186
15	0.1369	24	0.1103	9	0.0208	9	0.0478	18	0.1249
15	0.0823	24	0.085	9	0.0846	9	0.1777	18	0.0443
12	0.1155	24	0.0967	9	0.0494	9	0.0919	18	0.0476
12	0.1722	24	0.0893	9	0.0744	9	0.0275	18	0.097
12	0.2133	24	0.0302	9	0.0911	9	0.0485	18	0.08
12	0.1594	24	0.0665	9	0.0185	9	0.0775	18	0.1058
12	0.1821	24	0.0889	9	0.1007			18	0.0708
12	0.0342	24	0.05	9	0.1092			18	0.1103
12	0.0824	24	0.0866	9	0.1491			18	0.0768
12	0.0006	24	0.117	9	0.0501			18	0.0845
12	0.0918	24	0.0669	9	0.1139			18	0.0929
12	0.1209	24	0.0743	9	0.1592			18	0.1181
12	0.0605	24	0.0933	9	0.1302			18	0.1151
12	0.1261	24	0.148	9	0.0397			18	0.0906
12	0.0538	24	0.0879	9	0.1466			18	0.0819
12	0.1258	24	0.0126	9	0.0892			18	0.043
12	0.0957	24	0.1184	9	0.1342			18	0.0409
12	0.0394	24	0.0958	9	0.023			18	0.071
12	0.0986	24	0.075	9	0.052			18	0.0892
12	0.1054	24	0.1247	9	0.0681			18	0.1789
12	0.0779	24	0.0572	9	0.078			18	0.0966
12	0.0398	24	0.0686	9	0.1595			18	0.0568
12	0.0343	24	0.0657	9	0.0991			15	0.0669
12	0.0331	24	0.0915	9	0.0437			15	0.104
12	0.0661	24	0.1024	9	0.0329			15	0.1011
12	0.2018	24	0.1245	9	0.0317			15	0.1438
12	0.0154	24	0.0809	9	0.1171			15	0.1159
12	0.1755	24	0.0759	9	0.2063			15	0.1675
12	0.0469	24	0.1185	9	0.0035			15	0.0866
12	0.0829	24	0.1296	9	0.13			15	0.0932
12	0.0594	21	0.1386	9	0.1045			15	0.078
9	0.0716	21	0.1042	9	0.0875			15	0.0742
9	0.0833	21	0.0358	9	0.0543			15	0.0898
9	0.1796	21	0.0828	9	0.0967			15	0.1349
9	0.1012	21	0.0869	9	0.0956			15	0.1444
9	0.0436	21	0.0872	9	0.2074			15	0.0703
9	0.0914	21	0.0995	9	0.0575			15	0.2502
9	0.0618	21	0.1323					15	0.0811
9	0.1303	21	0.0736					15	0.0413
9	0.0672	21	0.1079					15	0.1457
9	0.1282	21	0.1145					15	0.1037
9	0.0319	21	0.0959					15	0.101
9	0.0399	21	0.079					15	0.1129
9	0.0965	21	0.1337					15	0.087
9	0.2583	21	0.0521					15	0.0375
9	0.1283	21	0.0561					15	0.1257
9	0.0552	21	0.0557					15	0.0815
9	0.1327	21	0.1686					15	0.1529
9	0.1162	21	0.0661					15	0.1015
9	0.1219	21	0.0485					15	0.071
9	0.1507	21	0.0865					15	0.0909
9	0.0833	21	0.0945					15	0.0635
9	0.0714	21	0.0912					15	0.0825
9	0.0785	21	0.0964					15	0.1162
9	0.0831	21	0.1052					15	0.1234
9	0.0369	21	0.1096					15	0.0784
9	0.1243	21	0.108					15	0.1245
9	0.1346	21	0.0591					15	0.0709
9	0.1583	21	0.0892					15	0.0343
9	0.0487	21	0.0946					15	0.0194
9	0.0461	21	0.0868					15	0.1052
9	0.1199	21	0.1321					12	0.1596
9	0.1322	21	0.0759					12	0.1101
9	0.1462	18	0.057					12	0.0996
9	0.2232	18	0.1167					12	0.1382
9	0.1935	18	0.1298					12	0.0138
9	0.0767	18	0.0896					12	0.0534
9	0.2134	18	0.1218					12	0.0628
9	0.0624	18	0.0402					12	0.1069
9	0.1553	18	0.0775					12	0.1237
9	0.08	18	0.0313					12	0.0368
9	0.052	18	0.1299					12	0.0556
9	0.0842	18	0.0707					12	0.2217
9	0.0337	18	0.1602					12	0.1249
9	0.1567	18	0.1679					12	0.0594
9	0.0457	18	0.0722					12	0.0117
9	0.1077	18	0.0362					12	0.07
9	0.2003	18	0.0948					12	0.1975
		18	0.1142					12	0.0626
		18	0.0434					12	0.1865
		18	0.0831					12	0.1575
		18	0.0075					12	0.006
		18	0.084					12	0.0439
		18	0.108					12	0.0901
		18	0.1408					12	0.0507
		18	0.0563					12	0.0427
		18	0.0535					12	0.1327
		18	0.1462					12	0.169
		18	0.1738					12	0.1267
		18	0.1096					12	0.0626
		18	0.0502					12	0.1019
		18	0.1172					12	0.0459
		15	0.2059					12	0.0135
		15	0.1008					12	0.0604
		15	0.1001					12	0.0467
		15	0.0733					12	0.076
		15	0.0401					12	0.096
		15	0.0976					12	0.0925
		15	0.1149					12	0.042
		15	0.0399					12	0.0699
		15	0.053					12	0.0799
		15	0.0434					12	0.1292
		15	0.1149					12	0.0627
		15	0.0839					12	0.0805
		15	0.0561					12	0.0512
		15	0.0744					12	0.0384
		15	0.064					12	0.0972
		15	0.0686					12	0.1421
		15	0.0431					12	0.0901
		15	0.1249					12	0.0815
		15	0.0985					12	0.1223
		15	0.0764					12	0.0826
		15	0.0384					12	0.122
		15	0.0691					12	0.1106
		15	0.0494					12	0.0115
		15	0.0815					12	0.0527
		15	0.1808					12	0.0501
		15	0.1311					12	0.0513
		15	0.1447					12	0.0251
		15	0.0751					12	0.0843
		15	0.0566					12	0.1046
		15	0.1058					12	0.073
		15	0.0366					12	0.0702
		15	0.0887					9	0.1625
		15	0.0458					9	0.1417
		15	0.0411					9	0.1589
		15	0.1683					9	0.0479
		15	0.0993					9	0.0253
		15	0.1189					9	0.0473
		15	0.1159					9	0.105
		15	0.1356					9	0.2466
		15	0.0774					9	0.0895
		15	0.0706					9	0.0078
		15	0.0691					9	0.1043
		15	0.0737					9	0.0869
		15	0.0688					9	0.1034
		15	0.0458					9	0.113
		15	0.0962					9	0.092
		15	0.0414					9	0.1777
		15	0.2155					9	0.1786
		15	0.0515					9	0.0366
		15	0.0782					9	0.0957
		15	0.0782					9	0.0134
		15	0.0912					9	0.1201
		12	0.0423					9	0.084
		12	0.059					9	0.1062
		12	0.1855					9	0.0831
		12	0.1163					9	0.0799
		12	0.0516					9	0.0222
		12	0.0791					9	0.1381
		12	0.0711					9	0.1225
		12	0.0892					9	0.1358
		12	0.0206					9	0.0589
		12	0.1073					9	0.0519
		12	0.1729					9	0.0201
		12	0.022					9	0.2116
		12	0.1313					9	0.174
		12	0.09					9	0.0698
		12	0.0741					9	0.087
		12	0.021					9	0.0717
		12	0.0374					9	0.065
		12	0.0764					9	0.0372
		12	0.0745					9	0.036
		12	0.0259					9	0.1551
		12	0.0717					9	0.1664
		12	0.0815					9	0.2041
		12	0.0827					9	0.0704
		12	0.0737					9	0.0875
		12	0.2493					9	0.2561
		12	0.0736					9	0.1436
		12	0.0168					9	0.113
		12	0.0572					9	0.1682
		12	0.0955					9	0.0756
		12	0.1185					9	0.0681
		12	0.147					9	0.0541
		12	0.0795					9	0.0943
		12	0.0464					9	0.1046
		12	0.1567					9	0.1496
		12	0.0909					9	0.0858
		12	0.0344					9	0.0643
		12	0.0603					9	0.1428
		12	0.0784					9	0.1218
		12	0.1122					9	0.0611
		12	0.1233					9	0.0872
		12	0.03					9	0.1058
		12	0.0297
		12	0.1123
		12	0.1585
		12	0.0415
		12	0.0548
		12	0.0518
		12	0.1106
		12	0.0961
		12	0.0673
		12	0.0786
		12	0.1491
		12	0.1146
		12	0.1528
		12	0.1512
		12	0.0671
		9	0.0867
		9	0.1066
		9	0.0769
		9	0.0469
		9	0.016
		9	0.0903
		9	0.0963
		9	0.0918
		9	0.1869
		9	0.0945
		9	0.0436
		9	0.0949
		9	0.1051
		9	0.1306
		9	0.1161
		9	0.1146
		9	0.0759
		9	0.0286
		9	0.0057
		9	0.0724
		9	0.049
		9	0.2495
		9	0.0992
		9	0.1298
		9	0.1433
		9	0.1317
		9	0.1626
		9	0.0978
		9	0.0399
		9	0.1397
		9	0.0522
		9	0.097
		9	0.0807
		9	0.0309
		9	0.1307
		9	0.1036
		9	0.1342
		9	0.1446
		9	0.1786
		9	0.055
		9	0.0817
		9	0.1727
		9	0.2019
		9	0.0941
		9	0.0205
		9	0.0992
		9	0.1582
		9	0.142
		9	0.0337
		9	0.0742
		9	0.056
		9	0.136
		9	0.0976
