# Supplementary material for: Lipid accumulation controls the balance between surface connection and scission of caveolae
Source: eLife. 2020 May 4;9:e55038. doi: 10.7554/eLife.55038 (PMC7239661; doi:10.7554/eLife.55038)
Supplement: Figure 2—figure supplement 2—source data 1. [file elife-55038-fig2-figsupp2-data1.xlsx]

## Sheet: Panel B
Panel B
Number of Cav-mCh pos. Structures				Number of Cav1-mCh tracks
0 s	300 s			596
53.4	48.8			393
72.625	51.375			470
50.25	43.75			526
68.7273	60.4545			477
73.4	61.3			392
53.4	52.4			321
39.1429	34.1429			229
36.8333	29.3333			249
41.5	36			267
25.3	22.6			254
23.3077	20.3077			191
32.3	25.6			223
54.8571	47.8571			402
50.8889	36.7778			290
40.9	38			361
38	26			231
40.5714	28.2857			230
44.3333	31			293

## Sheet: Panel C
Panel C
Relative numbr of Cav1-mCh pos. Structures
Bodipy-GM1	Bodipy-LacCer	Bodipy-Cer	Bodipy-Chol	Bodipy-SM C12	Bodipy-SM C5
0.957479	0.953481	1.10823	0.970207	1.03444	1.46154
0.994784	1.36421	1.06455	0.746313	0.866691	0.747764
0.803948	0.965537	0.872294	1.11947	0.711477	0.584615
0.836789	0.846022	0.859833	0.59705	0.851514	1.51374
0.989045	0.93913	0.6939	0.559735	0.783284	0.730769
0.690227	1.06397	0.646712	1.21276	0.881745	1
0.643684	1.23158	0.793692	0.953622	1.05075	1.07005
1.73795	1.25053	0.665677	1.03336	0.726902	0.779487
1.14637	1.4441	0.636913	0.798419	0.723959	0.835165
1.00113	1.17474	0.847371	0.952369	0.891542	1.36915
1.06691	1.13684	0.680701	0.47822	1.18721	2.05797
0.946958	1.19739	0.922747	0.672806	0.783284	1.31279
0.642557	0.845216	0.764296	0.491883	1.05075	1.3196
1.32795	1.06435	0.697601	0.971154	1.23921	0.698783
1.27619	1.00956	0.837121	1.96753	0.883582	0.860606
1.41363	1.05484	1.32295	0.819805	1.14627	0.896465
1.06022	1.29318	1.21981	0.660813	0.89938	0.887927
1.53143	0.898042	0.979006	1.36634	0.895032	0.939785
0.998962	0.840721	0.803636	1.62595	1.77112	1.18354
0.706813	1.14417	0.885153	1.04542	1.13211	0.808322
1.41363	1.49063	0.555041	1.22667	0.74126	0.681004
1.18338	1.12696	0.93109	0.713145	1.38369	0.980645
1.34407	1.51669	1.02469	0.516158	0.790678	0.80086
0.9648	1.0757	0.988095	0.926575	1.45464	1.26186
0.928992	1.10227	0.874521	0.870151	0.812641	0.776344
1.05123	0.732824	1.57197	1.02515	0.669525
1.23692	0.781298	1.00499	1.03906	1.53743
1.30171	1.25887	0.544367	0.857969	0.960109
1.04416	1.04906	0.995581	0.841146	0.847312
1.14857	0.939156	0.762321	0.654225	0.739967
1.3574	0.824973	0.875257		1.32093
1.02551	0.914563	1.32569		1.04268
	1.13232			0.883131
				0.794003
				0.597953
				0.787548
				1.35956
				1.11476

## Sheet: Panel D
Panel D
Total BodipyFI (a.u.) after 10 min
Bodipy-SM C5	3x Bodipy-SM C5
2047.95	11693.1
1586.69	8116.95
2492.37	7265.15
1878.23	6647.63
	8178.13
