# Supplementary material for: Lipid accumulation controls the balance between surface connection and scission of caveolae
Source: eLife. 2020 May 4;9:e55038. doi: 10.7554/eLife.55038 (PMC7239661; doi:10.7554/eLife.55038)
Supplement: Figure 2—source data 1. [file elife-55038-fig2-data1.xlsx]

## Sheet: Panel B
Panel B
Control	Frequency of Track mean speed
	Track mean speed
Track duration	0-0,05					0,051-0,1					0,101-0,15					0,151-0,2						0,21-0,25
0-10 s	36.0294	30.2326	43.1818	30	29.3478	35.2941	31.3954	36.3636	26	35.8696	16.9118	23.2558	18.1818	24	21.7391	7.35294	13.9535	2.27273	14	11.9565	4.41176	1.16279	0	6	1.08696
11-20 s	36.9004	56.1983	51.8518	27.933	29.8246	38.7454	28.9256	30.5556	41.3408	40.3509	19.1882	10.7438	13.8889	24.581	20.4678	4.05904	4.13223	2.77778	5.58659	8.18713	1.10701	0	0.925926	0.558659	1.16959
21-30 s	36.9128	41.6667	50	21.8487	19.1177	42.953	43.0556	40.4762	42.8571	47.0588	16.7785	13.8889	9.52381	28.5714	29.4118	3.3557	1.38889	0	6.72269	2.94118	0	0	0	0	1.47059
31-40 s	30.9278	46.6667	50	23.2558	32.7586	53.6082	43.3333	40	47.6744	44.8276	14.433	10	7.5	26.7442	22.4138	1.03093	0	2.5	2.32558	0	0	0	0	0	0
41-50 s	45.4545	54.1667	50	26.1905	48.2759	45.4545	41.6667	50	54.7619	41.3793	9.09091	4.16667	0	19.0476	10.3448	0	0	0	0	0	0	0	0	0	0
51-75 s	41.3043	34.8837	70	14.0351	43.5484	53.2609	55.8139	20	61.4035	45.1613	5.43478	9.30232	10	24.5614	11.2903	0	0	0	0	0	0	0	0	0	0
76-100 s	51.1628	48	70	25	43.4783	44.1861	44	30	66.6667	56.5217	4.65116	8	0	8.33333	0	0	0	0	0	0	0	0	0	0	0
101-150 s	59.5238	64.5161	94.7368	63.1579	46.875	35.7143	32.2581	5.26316	31.5789	53.125	4.7619	3.22581	0	5.26316	0	0	0	0	0	0	0	0	0	0	0
151-200 s	84.2105	100	100	72.2222	62.5	15.7895	0	0	27.7778	37.5	0	0	0	0	0	0	0	0	0	0	0	0	0	0	0
201-300 s	88.3721	91.1765	96.6667	79.4118	100	11.6279	8.82353	3.33333	20.5882	0	0	0	0	0	0	0	0	0	0	0	0	0	0	0	0
Panel B'
EHD2 siRNA	Frequency of Track mean speed
	Track mean speed
Track druation	0-0,05					0,051-0,1					0,101-0,15					0,151-0,2						0,21-0,25
0-10 s	31.4286	19.5122	32.0513	8.43374	12.5	40	41.4634	34.6154	32.5301	37.5	22.8571	21.9512	16.6667	26.506	30	5.71429	14.6341	12.8205	25.3012	15	0	2.43902	3.84615	7.22892	5
11-20 s	37.2093	20.6522	28.5714	15.748	31.25	46.5116	42.3913	44.4444	40.1575	53.125	13.9535	20.6522	23.0159	37.0079	15.625	2.32558	13.0435	3.1746	7.08661	0	0	3.26087	0.793651	0	0
21-30 s	36.8421	20.4546	15.2778	11.1111	29.1667	52.6316	56.8182	52.7778	51.8518	41.6667	10.5263	20.4546	31.9444	30.8642	22.9167	0	2.27273	0	6.17284	6.25	0	0	0	0	0
31-40 s	35.8974	9.09091	22.4138	5.26316	12.5	56.4103	72.7273	55.1724	60.5263	66.6667	7.69231	18.1818	18.9655	31.5789	20.8333	0	0	3.44828	2.63158	0	0	0	0	0	0
41-50 s	28.2609	21.4286	14.2857	20	10	67.3913	57.1429	76.1905	55	60	4.34783	21.4286	9.52381	25	30	0	0	0	0	0	0	0	0	0	0
51-75 s	22.8571	13.3333	23.0769	16.6667	20	74.2857	60	65.3846	66.6667	50	2.85714	26.6667	11.5385	16.6667	30	0	0	0	0	0	0	0	0	0	0
76-100 s	42.8571	11.1111	25	22.2222	0	57.1429	77.7778	75	77.7778	100	0	11.1111	0	0	0	0	0	0	0	0	0	0	0	0	0
101-150 s	30.7692	40	0	12.5	44.4444	69.2308	60	100	87.5	55.5556	0	0	0	0	0	0	0	0	0	0	0	0	0	0	0
151-200 s	14.2857	25	0	0	66.6667	85.7143	50	100	100	0	0	25	0	0	33.3333	0	0	0	0	0	0	0	0	0	0
201-300 s	40	66.6667	50	0	50	60	33.3333	50	100	50	0	0	0	0	0	0	0	0	0	0	0	0	0	0	0

## Sheet: Panel D
Panel D
Fold change in track duration (Cav1-mCh was set to 1)
Cav1-mCh (control)	Bodipy-GM1	Bodipy-LacCer	Bodipy-Cer	Bodipy-Chol	Bodipy-SM C12	Bodipy-SM C5	3x Bodipy-SM C5	Bodipy-PE
1	0.827301	0.969907	0.892392	0.844236	1.56157	1.14735	1.04049	1.16877
1	0.709115	0.726852	0.858807	0.812145	0.851539	0.826839	1.07405	0.998054
1	1.04476	0.833333	1.19705	0.863984	1.37537	0.692129	0.849591	0.6982
1	0.945487	0.87037	1.17546	0.80474	1.35055	1.1729	1.19572	0.882053
1	0.803664	1.125	1.14188	0.750432	1.20159	1.18452	0.933501	1.00024
1	0.900576	0.835648	0.806032	0.757838	1.35055	0.815226	0.843298	1.17972
1	0.855666	0.824074	1.01474	0.691187	1.48461	1.17058	1.20201	1.19504
1	0.92185	0.909722	0.85401	0.810265	1.65839	0.882581	1.14537	1.11187
1	1.10149	0.847222	0.693283	0.810265	1.00298	0.968207		1.35263
1	0.910031	0.805556	0.686086	0.891054	1.35303	0.933792		1.1513
1	0.962033	0.569444	0.741261	1.15481	0.918297	1.00951		1.25937
1	0.811373	0.94373	0.915924	0.888678	1.43843	0.867257		0.913101
1	0.783634	0.646672	0.788067	0.796008	1.20598	1.04163		0.906484
1	0.90846	0.856898	0.857807	0.80076	1.08631	1.14258		0.688134
1	0.952381	1.27506	1.05773	0.69621	1.41082	1.00033		0.765329
1	0.910772	0.863753	0.953119	0.796008	1.28654	1.01639		0.674901
1	1.01248	0.850043	1.0833	0.670072	1.03337	0.898148		0.979268
1	0.929265	1.03742	1.13128	0.902935	0.853855	1.05093		1.04102
1	0.74896	0.74036	1.17134	0.708091	0.96893	0.881944		1.51742
1	0.885344	0.845473	0.902663	0.872045	0.987342	0.888889
1	0.79288	0.946015	0.900306	0.83165	1.50551	0.81713
1	0.866852	0.888889	1.0535	0.80076	1.39529	1.24306
1	0.987055	0.669523	0.65991	1.03362	1.04709	0.965278
1	0.697235	0.664953	0.895593	1.05263	1.51553	0.861111
1	0.850863	0.973185	1.14542	0.71835	1.03457	0.960648
1	0.891042	0.822931	1.11006	0.761024	1.22495	0.798611
1	0.921768	0.989367	1.02522	0.80844	1.03958
1	0.90286	0.906149		0.810811	1.19238
1	0.921768	0.730467		0.943575	1.67585
1	0.935949	0.767453		1.11427	1.26253
1	1.03285	0.991678		0.974395
1	0.952493	0.952381		0.715979
1		0.975497		0.990991
1		0.945446		0.675676
1		1.00621		0.694642
1		0.958413
1		0.659656
1		0.659656
1		0.791109
1		0.862811
1		0.728967
1		0.556883

## Sheet: Panel E
Panel E
Fold change in track duration (Cav1-mCh was set to 1)
Cav1-mCh (control)	LacCer(d18:1/16:0)	Chol	SM(d18:1/16:0)
1	0.830151	0.977568	1.49565
1	0.810067	0.658796	1.39715
1	0.798909	0.755608	1.98223
1	0.868088	0.871311	2.13137
1	0.861394	0.706021	1.42186
1	0.841309	0.762692	1.60875
1	0.694024	1.01535	1.57356
1	0.812299	0.845121	1.92935
1	1.02593	0.601611
1	1.00915	0.847508
1	0.93005	0.833184
1	0.836566	0.976425
1	0.642406	1.07669
1	0.704729	0.909579
1	0.963609	0.835571
1	0.810198
1	0.987579
1	0.836566

## Sheet: Panel F
Panel F
Fold change in track mean speed (Cav1-mCh was set to 1)
Cav1-mCh (control)	Bodipy-GM1	Bodipy-LacCer	Bodipy-Cer	Bodipy-Chol	Bodipy-SM C12	Bodipy-SM C5	Bodipy-PE
1	1.07025	0.862735	1.10428	1.00802	0.625483	0.922574	0.682474
1	1.23787	1.1524	1.09492	1.13882	1.13205	1.32252	0.902753
1	1.00875	1.19154	0.66631	1.34636	0.566795	1.55071	1.35118
1	1.10101	1.09603	0.514706	1.14405	0.562162	0.814613	1.0955
1	1.2148	0.958246	0.758021	1.29578	0.918919	0.777808	0.888986
1	1.18712	1.05846	1.0631	1.51378	0.776834	1.31025	0.79458
1	1.14099	1.18528	0.516578	1.44053	0.627027	0.767993	0.833916
1	1.05334	0.88309	0.890909	1.35664	0.464865	1.19493	0.855551
1	0.871889	1.02557	1.21658	1.39161	1.0471	0.848485	0.680507
1	1.2271	1.12109	1.23904	1.13636	0.829344	0.943434	0.94684
1	1.19327	1.26827	1.09679	0.839161	0.995082	1.28485	0.586356
1	1.11886	1.19641	0.993714	0.972028	0.64918	0.864646	1.24116
1	1.0621	1.21923	1.21509	1.4528	0.8	0.973737	1.04951
1	0.909681	0.986145	0.926483	1.45455	0.688525	0.765657	1.54917
1	0.872385	0.839446	0.937961	1.36888	0.72459	1.09495	1.36893
1	0.963191	1.185	1.18721	1.33566	0.637705	1.09293	1.58567
1	0.865899	1.05786	0.895327	1.39161	0.791803	1.10097	1.22747
1	0.938868	0.751426	1.10182	1.35664	1	1.06526	1.24116
1	1.17237	1.17848	0.99777	1.33916	0.903279	0.995834	0.743783
1	0.904816	1.04645	1.17057	1.21329	0.92459	0.975997
1	1.18048	1.05134	0.975474	1.21503	0.852872	1.25174
1	1.05238	1.08883	0.761799	1.1014	0.742722	0.710177
1	1.00859	1.2991	1.34151	0.88986	0.925256	0.99385
1	1.18456	1.42135	0.858417	1.0979	0.478363	0.956159
1	1.13591	1.05886	1.02564	1.46241	0.783635	1.03749
1	1.12752	1.21453	0.92159	1.27703	0.854445	1.31323
1	1.13758	1.04427	1.14827	0.937178	1.03068
1	1.21644	1.18858		1.07793	0.851298
1	1.12416	1.06697		0.956059	0.605822
1	0.755034	1.20966		0.899416	0.845004
1	0.877517	1.0313		1.13629
1	0.954698	0.862656		1.07106
1		0.875628		0.923447
1		0.994		1.29591
1		1.07652		1.45383
1		0.992218
1		1.44455
1		1.44942
1		1.31647
1		1.29864
1		1.35538
1		1.46401

## Sheet: Panel G
Panel G
Fold change in track duration (Cav1-mCh was set to 1)
Cav1-mCh (control)	SMase
1	0.764281
1	0.561734
1	1.02183
