# Supplementary material for: Lipid accumulation controls the balance between surface connection and scission of caveolae
Source: eLife. 2020 May 4;9:e55038. doi: 10.7554/eLife.55038 (PMC7239661; doi:10.7554/eLife.55038)
Supplement: Figure 3—figure supplement 1—source data 1. [file elife-55038-fig3-figsupp1-data1.xlsx]

## Sheet: Panel B
Panel B
Fold change in coloc. Of cavin1-GFP to Cav1-mCh
Control	PE	LacCer(d18:1/16:0)	Chol	SM(d18:1/16:0)
1	1.08366	0.463117	1.1129	1.10935
1	1.08833	1.0068	0.880713	0.677453
1	0.852905	0.932412	1.10969	1.1075
1	1.07661	1.12352	0.546913	1.09035
1	0.999189	1.15188	0.997418	0.838284
1	1.04478	1.23967	1.20089	0.837614
1	0.96249	0.859555	0.702966	1.17907
1	1.1498	0.977757	0.852442	0.876509
1	0.987059	0.783438	1.10049	0.907643
1	1.149	0.70617	0.658122	1.16494
