# Supplementary material for: Lipid accumulation controls the balance between surface connection and scission of caveolae
Source: eLife. 2020 May 4;9:e55038. doi: 10.7554/eLife.55038 (PMC7239661; doi:10.7554/eLife.55038)
Supplement: Figure 3—figure supplement 2—source data 1. [file elife-55038-fig3-figsupp2-data1.xlsx]

## Sheet: Panel B
Panel B
Fold change in track duration (Cav1-mCh was set to 1)
Untreated (Cav1-mCh)	Ctrl siRNA	Ctrl siRNA + LacCer	Ctrl siRNA	Ctrl siRNA + Chol
1	0.953704	0.590278	0.99537	0.787037
1	0.891204	0.803241	1.4213	0.921296
1	0.912037	0.69213	1.1713	0.842593
1	1.02778	0.800926	1.03241	0.819444
1	1.09028	0.652778	1	0.909722
1	0.969907	0.518519	0.877315	0.842593
1	1.12037	0.650463	1.1875	1.01389
1	1.03009	0.657407	1.27315	0.664352
1	1.05787	0.592593	0.886574	0.840278
1	1.08796	0.743056	0.939815	1.00231
1	0.837963	0.921296	0.990741	0.939815
1	0.979167	0.611111	1.05556	0.803241
1	0.944444	1.01852	0.821759	1.03935
1	1.05093	0.62963	1.09722	0.689815
1	0.928241	0.902778	0.747685	0.949074
1	0.849537	0.983796	1.13889	0.861111
1	1.125	1.07407	1.12963
1	0.837963	0.886574
1	0.925926	0.710648
1	0.976852	0.9375
1	0.958333	0.710648
1	1.02315	0.645833
1	0.907407	0.666667
1	1.00694	0.636574
		0.643519
		0.916667
		0.99537

## Sheet: Panel C
Panel C
Fold change in track mean speed
Untreated (Cav1-mCh)	EHD2 siRNA	Ctrl siRNA
1	1.07875	0.942539
1	1.21966	1.2228
1	1.16017	1.26977
1	1.43886	1.09754
1	1.47487	1.01926
1	1.36997	0.831376
1	1.49679	0.640363
1	1.54846	0.966025
1	1.47017	0.933145
1	1.51245	0.847033
1	1.47174	1.2134
1	1.41538	1.05997
1	0.966025	0.886175
1	1.03022	0.911226
1	1.00047	1.24628
1	1.11007	0.942539
1	1.17896	0.828245
1	1.17739	1.01613
1	0.889306	1.05057
1	1.05057	0.749961
1	1.04587	0.876781
1	1.0584	0.707688
1	1.36214	0.623141
1	1.3778	0.618444
	1.24315	1.04274
	1.49209	0.435259
	1.40911	0.710819
	1.28699	0.837639
	1.30734	0.912792
	12.8229	1.04901
	1.40128	0.74683
	1.2682	0.784406
	1.26507	0.837639
	1.49992	0.754658
	1.49209	0.872084
	1.39815	0.659151
	1.15547	0.992641
	1.32613	0.825114
	1.24785	1.21966
	1.15704	0.615312
	1.41694	0.749961
	1.22436
	1.1586
	0.995773
	1.4827
	1.27603
	0.981681
	0.6341
	1.04901
	1.49992
	1.18365
	1.35118
	1.28699
	1.15391
	0.93158
	1.33239
	1.3183
