# Supplementary material for: Lipid accumulation controls the balance between surface connection and scission of caveolae
Source: eLife. 2020 May 4;9:e55038. doi: 10.7554/eLife.55038 (PMC7239661; doi:10.7554/eLife.55038)
Supplement: Figure 3—figure supplement 3—source data 1. [file elife-55038-fig3-figsupp3-data1.xlsx]

## Sheet: Panel B
Panel B
Fold change in track duration (Cav1-mCh + EHD2-BFP was set to 1)
Cav1-mCh + EHD2-BFP	Cav1-mCh - EHD2-BFP
1	3.24634
1	0.292182
1	0.194783
1	0.45449
1	0.162322
1	0.194783
1	0.422028
1	0.0973985
1	1.30773
1	3.26677
1	1.86206
1	0.261341
1	0.555349
1	0.130677
1	0.16333
1	0.784024
1	0.0979979
1	0.0979979
1	1.16467
1	0.197303
1	2.43355
1	0.624822
1	0.131536
1	1.77583
1	0.230201
1	0.0986654
1	0.295969
1	0.0986517
1	0.949325

## Sheet: Panel D
Panel D
	mCherry FI (%)
Time (s)	mCh-EHD2 wt	mCh-EHD2 wt	mCh-EHD2 wt	mCh-EHD2 wt	mCh-EHD2 wt	mCh-EHD2 wt	mCh-EHD2 wt	mCh-EHD2 wt	EHD2 wt-mCh	EHD2 wt-mCh	EHD2 wt-mCh	EHD2 wt-mCh	EHD2 wt-mCh	EHD2 wt-mCh	EHD2 wt-mCh	EHD2 wt-mCh	mCh-EHD2 I157Q	mCh-EHD2 I157Q	mCh-EHD2 I157Q	mCh-EHD2 I157Q	mCh-EHD2 I157Q	mCh-EHD2 I157Q	mCh-EHD2 I157Q	mCh-EHD2 I157Q	EHD2 I157Q-mCh	EHD2 I157Q-mCh	EHD2 I157Q-mCh	EHD2 I157Q-mCh	EHD2 I157Q-mCh	EHD2 I157Q-mCh	EHD2 I157Q-mCh	EHD2 I157Q-mCh
0	99.5941	99.4715	100.208	99.7343	100.353	100.617	101.688	100.575	99.6584	99.5019	100.501	100.401	100.749	97.5443	102.094	99.4676	99.9364	101.953	100.889	102.997	101.404	99.7726	102.201	99.6813	97.059	101.255	100.271	100.705	99.7432	100.685	101.147	100.638
5	101.514	99.7528	99.5878	100.736	100.628	100.702	98.8235	100.215	100.088	99.8795	98.5953	99.588	100.507	99.321	97.3256	100.097	99.2317	100.218	99.6453	99.0149	99.5675	101.806	98.4119	99.6719	100.549	98.6471	101.373	99.7809	101.074	100.911	98.7468	99.2413
10	98.8918	100.776	100.204	99.5299	99.0196	98.6817	99.489	99.2106	100.254	100.619	100.904	100.011	98.7433	103.135	100.58	100.435	100.832	97.8291	99.4658	97.9879	99.0281	98.4214	99.3869	100.647	102.392	100.098	98.3555	99.5139	99.183	98.4038	100.106	100.121
15	17.3775	26.8996	15.0837	19.8213	24.1915	18.0618	17.1323	13.9285	14.5829	21.567	22.3746	19.3134	16.6943	13.5339	18.2486	13.2742	22.3767	15.4467	9.75983	9.77989	10.9204	8.41189	10.8798	12.7072	18.5866	10.152	14.2033	15.7067	12.6126	9.81792	9.02548	11.9442
20	38.3221	50.09	36.2044	50.24	48.3681	42.0975	42.0583	29.9522	43.5107	53.6149	49.8958	52.3397	40.402	29.4057	42.6178	31.6065	26.2894	20.7058	15.9798	13.0658	13.8799	11.3469	16.0937	16.4001	24.4753	22.7124	23.1597	21.5927	23.1599	17.565	17.752	18.4641
25	48.3957	56.4124	43.1139	55.6341	56.5954	51.4422	47.5364	34.4267	51.2703	64.0077	58.1129	63.3293	53.7792	31.0642	52.2605	35.2678	27.287	23.5371	17.8077	13.8813	15.3526	12.1348	17.1706	17.6345	27.1191	28.0238	26.8911	22.9918	26.1515	20.7834	20.0835	20.9657
30	52.495	61.2034	49.4959	61.0411	60.9314	56.3504	51.518	36.9955	58.244	72.3249	61.7373	70.1326	62.2637	38.724	55.9796	42.0693	29.8114	25.6213	18.5635	15.0757	16.3636	13.1075	19.4646	19.4596	27.89	31.3243	28.5373	25.2692	30.7969	23.8913	21.9762	23.6547
35	57.1795	64.7372	53.2397	66.2332	63.6186	61.7631	57.4811	39.7726	62.3097	76.783	65.6841	75.733	67.5293	39.5295	58.5699	41.3819	30.7163	26.9421	19.6175	15.6318	16.9218	12.9997	20.2108	19.7243	28.697	33.2969	29.1616	26.3048	32.181	24.3168	23.245	24.7835
40	61.3963	67.672	58.6168	68.2081	66.6074	62.1532	59.7852	41.6963	65.7584	78.8528	65.5133	78.389	71.5332	40.2733	59.096	42.4501	32.2609	28.5973	19.7224	16.2251	17.5981	13.7269	20.8404	20.1458	28.9102	34.5205	29.773	27.6939	34.2811	24.5457	24.4556	26.0605
45	63.3242	68.8131	56.9789	74.9209	69.376	64.4277	62.8254	42.9525	67.8687	82.3962	68.3142	78.3185	74.9833	43.8143	59.9111	45.5889	33.5236	29.193	20.2415	16.3359	18.0641	14.7069	20.5811	20.1186	29.3494	35.6911	30.6012	28.8198	35.7421	26.0671	24.9984	26.0925
50	61.1364	70.8964	61.0236	74.0408	69.2984	66.0253	64.1278	43.1655	70.1658	84.007	68.6367	82.2258	77.1639	43.4296	61.0665	43.9635	34.1171	29.0296	21.2551	16.5516	18.5676	14.7482	21.3295	20.3737	28.5157	37.222	31.2051	28.1233	36.9478	26.1466	25.561	26.9361
55	59.91	72.3821	61.3695	75.9404	70.2065	68.386	68.1127	43.3693	71.0882	86.5252	70.6044	82.2015	78.6378	43.7348	61.3541	47.3572	34.1861	29.5295	21.3512	16.7328	18.7501	14.95	22.4359	21.4162	28.1934	37.9843	32.664	28.8387	37.8894	26.2663	26.213	27.0441
60	63.761	74.0242	61.2577	76.8332	72.5453	68.8186	70.7393	45.2161	72.0622	87.2225	73.324	83.5506	80.9807	47.6416	62.3881	46.279	34.8368	31.2104	21.0979	17.1982	19.2811	14.6827	22.2145	21.4886	27.8853	38.7149	33.8395	29.412	38.7335	25.8879	26.721	27.0709
65	66.8073	76.6144	64.0329	77.5214	73.9737	69.7443	71.2007	46.825	72.4738	88.0812	71.7215	84.3059	82.3508	48.402	63.8042	50.0096	35.7904	32.0529	21.3256	17.387	19.6594	15.4782	22.7627	21.6548	30.4128	39.872	35.6855	29.9052	39.0783	26.2772	26.9308	28.9674
70	65.7295	76.804	66.4854	79.4401	76.4164	68.6659	73.5449	48.0347	73.1387	88.121	73.4041	86.9524	82.7183	48.8419	63.4863	50.8156	35.3417	31.9629	21.6182	17.8121	19.6598	16.1536	22.8092	22.3777	29.4812	39.8716	35.2399	30.2073	41.7566	27.5943	27.4727	29.0735
75	64.3913	77.3642	66.3975	79.1151	75.0314	67.8492	75.7081	49.689	75.9782	89.8967	75.6523	86.398	83.1015	48.3617	64.2652	49.5514	34.3049	32.1356	22.2392	18.0199	19.5285	15.4694	22.8365	22.7799	30.6095	38.6159	36.7164	30.0838	40.6298	26.5444	27.5056	28.4507
80	66.992	79.1076	66.923	80.5072	75.0972	68.4138	74.5686	50.0089	75.4174	90.9445	75.6953	86.6436	83.2488	50.2781	64.5632	51.0484	37.3705	31.9421	22.0908	18.5409	19.8761	15.4432	22.9757	23.5871	29.2992	39.2674	37.0914	30.3856	40.7799	26.3564	28.1895	28.3719
85	66.6493	80.1576	70.2631	81.3086	76.2715	70.0206	73.7445	51.6226	75.7545	92.0652	74.137	88.1927	83.9369	52.1049	64.3825	50.4147	36.2944	32.2175	23.0468	18.6788	20.266	15.6605	24.1985	23.5134	29.9355	40.7272	36.657	30.6893	41.4805	26.6182	28.8698	28.9126
90	70.2981	78.9907	63.2942	82.2869	79.0305	71.1886	76.1557	51.1737	79.0732	92.7666	76.3283	89.3661	85.1298	53.0618	64.833	51.6342	36.2228	31.9693	23.3983	18.8407	20.8999	15.5557	23.7137	23.646	30.2123	40.6042	37.2199	31.2156	39.9826	26.6307	28.3569	28.3606
95	68.1181	81.353	69.7326	82.2187	80.492	72.438	77.1482	50.8773	80.4022	91.8647	77.0326	86.814	86.3564	55.2417	64.8841	48.8109	35.9696	33.1887	23.1779	18.6104	20.7011	15.5196	24.4666	23.7411	28.1812	39.9335	37.3903	31.5307	42.3702	26.7508	28.9125	29.5115
100	68.3529	79.9694	68.7284	82.4286	80.4622	71.9057	78.8544	51.14	83.0844	92.5865	77.1757	89.6122	86.2729	56.0093	65.1199	48.719	36.4578	32.5052	23.7919	19.0558	20.5839	16.11	25.058	24.1363	29.1947	43.1857	38.4863	31.6502	42.5584	26.9365	29.1837	30.9745
105	70.4766	83.2853	68.0077	82.8243	78.4984	71.539	78.4816	50.8211	80.0449	92.8029	76.4933	89.3063	85.8097	54.267	67.7387	50.3497	37.661	32.4828	24.8052	19.4417	21.0643	15.9337	25.254	23.3083	28.0559	43.1366	39.3799	31.3492	44.4341	27.8639	29.0026	30.2319
110	67.3551	81.416	70.2037	85.4319	79.5072	72.2318	79.1806	51.3351	79.5756	92.1714	75.2118	90.7407	84.9894	52.9296	66.064	52.7586	37.9513	32.1709	23.8938	20.3023	20.666	15.9302	24.7782	23.4724	28.6683	42.6035	41.602	31.5531	43.0583	27.9514	29.5356	30.4196
115	68.5005	83.2942	69.725	84.8881	81.2794	70.606	79.5294	53.0773	78.5025	94.0084	77.8843	89.9863	86.7846	54.5001	67.5063	51.8644	39.5691	31.2517	24.1011	20.1725	20.7219	16.2939	25.4306	23.8128	27.8026	42.2882	42.8536	32.5695	44.0879	27.6978	28.7425	30.0173
120	70.7474	82.0208	68.4257	83.1466	81.3735	71.8738	79.2233	53.4434	79.9088	92.6056	77.6194	91.2143	86.4027	51.7917	67.653	53.134	39.1037	32.2991	24.0861	19.9449	20.2421	16.8987	25.8515	23.6623	26.4461	41.9531	43.1203	31.3815	44.0831	27.7355	29.3016	30.1087
125	69.3038	83.8129	66.37	84.5457	80.4279	73.3517	80.886	53.1831	79.657	93.1128	81.416	88.3417	86.8725	54.1354	67.1647	52.5676	38.9663	31.3155	24.3027	20.1253	19.7496	16.01	26.7484	24.1708	27.7904	43.3749	42.5435	32.5566	44.8972	28.032	30.1224	29.3454
130	71.6692	82.1396	64.6011	85.7829	82.1907	74.0513	81.0922	54.3599	81.6075	93.7576	79.7536	90.8253	86.0306	55.4286	68.541	52.0276	40.3093	31.2524	23.5402	20.2644	19.8343	16.1772	25.6999	24.2152	28.3582	44.1831	42.7152	32.3838	44.1305	28.8913	30.3343	29.9372
135	71.0664	83.9274	68.8471	84.0966	81.4068	72.797	85.3691	55.2665	80.845	92.7336	79.467	89.4972	87.4603	57.1126	69.8199	52.0551	40.123	31.7662	23.5757	20.5459	20.0052	16.5207	27.7692	23.9438	28.7637	45.1136	44.5369	32.3751	45.0208	30.3671	30.166	31.2335
140	73.2745	84.2136	68.227	85.8754	81.0496	74.0636	84.0502	54.5952	82.2868	93.4863	78.7237	91.3267	87.2292	58.3885	69.8169	50.7024	40.7251	32.015	24.6117	20.4123	19.8593	17.3839	28.3894	24.4577	29.9615	44.0407	43.5321	32.9517	46.0451	29.7631	31.1274	31.5688
145	74.8358	83.6524	70.5539	85.4361	81.5774	74.4495	83.9993	54.8068	82.2669	93.9393	78.339	91.9851	87.2922	59.1016	70.6535	53.0762	40.2175	32.134	25.8969	20.2343	20.5239	17.1061	28.0949	25.6548	29.2478	45.8851	45.0937	32.7103	45.6397	30.4563	31.8103	29.8817
150	75.0074	81.8574	67.5173	85.3089	82.0543	76.2817	85.7852	57.3636	82.423	93.3826	79.3459	92.9695	88.9246	60.172	73.4819	50.2135	40.6621	32.8376	25.2156	20.1763	21.0209	16.8625	28.7492	25.6539	29.4663	45.7231	45.9181	32.7521	48.5813	30.738	31.9267	30.029
155	74.3451	82.1344	69.0237	84.4058	79.0775	74.8903	84.9768	56.731	83.7568	92.397	79.2636	91.9647	88.279	59.244	71.8045	54.7471	41.084	33.4408	25.2057	20.5865	21.0371	17.0286	29.7412	27.1078	30.1596	44.5729	45.7239	33.5424	48.5696	30.6911	33.7255	29.6775
160	75.603	83.9661	65.6512	85.1947	79.5357	77.1306	85.1876	56.8272	81.6764	92.9673	82.3346	95.9412	88.3238	60.1224	71.4766	53.8119	41.3578	32.3811	24.888	21.0984	22.3276	17.5516	29.8986	26.4043	31.0971	46.0404	45.6909	35.0276	47.1274	30.5987	33.3013	30.623
165	76.7572	82.0514	64.6289	85.9874	80.5131	77.5117	89.4223	57.2869	83.8554	92.2965	80.5148	92.7319	88.371	58.2287	74.1972	52.6044	41.5727	34.3231	24.418	21.4669	22.7334	18.2435	30.4069	26.7968	31.9284	46.1708	44.4373	33.3965	48.847	30.6022	33.535	29.9781
170	77.9857	80.7103	66.8286	88.069	82.4583	76.7828	89.7839	56.7252	82.6579	95.6682	83.3635	93.6856	88.8875	59.616	72.6099	55.9188	40.8332	34.1658	25.3682	21.6028	22.8223	18.0243	31.5984	26.6251	32.2346	46.5136	45.3639	33.0865	51.2716	29.7071	33.7556	29.7741
175	76.104	82.2523	64.9393	89.9742	81.0687	79.1939	90.6292	57.4522	82.5739	94.761	79.9356	92.963	89.9235	58.8668	73.3436	60.2717	40.9899	33.782	25.4453	21.4628	22.947	17.7063	31.6967	26.3639	32.4037	43.17	47.3251	33.9508	46.9212	30.4416	34.3655	30.211
180	77.6715	82.714	63.9311	89.1932	80.7923	75.4654	88.2109	58.9825	83.056	95.1756	81.2513	91.6055	90.2214	58.822	72.633	59.8903	40.9316	33.5345	25.8555	21.689	22.8545	18.2932	32.0518	27.0214	32.7379	46.225	49.6526	33.877	50.3706	29.6875	35.9069	30.639
185	76.778	82.3765	63.1056	87.9381	81.3568	77.9399	89.4246	58.5461	82.9444	95.4104	82.5301	92.3775	90.0555	59.6381	73.5818	58.5234	41.4762	33.1122	25.915	21.469	22.6938	18.9548	32.1932	26.5648	32.7684	45.9665	48.7418	33.9258	48.2486	30.0547	34.9381	30.815
190	79.8314	82.8379	65.6987	89.6096	79.8216	76.5466	90.9908	59.2933	82.2788	97.1911	84.2524	90.0421	90.7723	60.9233	75.3455	54.8093	40.9068	34.7013	25.7422	21.5144	22.397	19.1614	31.4278	27.053	32.0721	45.8917	48.0012	34.6238	47.403	30.0302	34.875	30.9967
195	77.1594	83.5836	66.5504	90.3169	82.4254	75.6092	91.8579	59.0133	81.7827	96.2414	83.8701	93.045	91.1803	61.8843	74.4063	55.4541	42.5733	34.6604	26.0644	21.3453	22.2282	18.6524	31.8173	28.2958	32.1961	44.5715	47.5438	35.2363	47.2793	30.2176	36.1521	31.3469
200	75.6789	84.4948	63.7704	90.1611	82.1046	74.4949	91.6949	60.3719	81.7947	96.3271	81.7033	92.4905	89.5116	61.5351	73.7728	57.4426	43.3361	34.3145	27.3974	22.1264	22.1459	17.8739	32.0829	28.3959	32.9214	45.0889	49.2276	35.1008	47.2016	30.7647	34.9563	32.3786
205	76.149	83.3348	62.6138	88.9289	82.5981	75.9344	93.7648	60.8826	83.8	95.22	83.5564	93.1155	90.9657	64.9251	75.7541	57.1605	43.0706	34.5901	27.2254	22.7207	23.0432	19.4571	32.3339	28.193	34.5958	44.9799	50.1663	34.2041	48.9698	30.5224	36.1555	32.8821
210	79.924	82.4911	68.0079	91.0291	81.3908	74.537	91.3423	60.5739	82.7914	95.4701	83.5803	92.6909	90.9675	64.7783	75.9897	57.3041	44.0943	35.0046	26.2204	23.0578	22.9814	19.6171	31.2697	27.9454	34.6959	45.0487	49.9765	34.4337	49.2482	29.7905	38.1482	32.4753
215	80.0425	82.5488	66.5438	91.8745	82.9144	74.235	95.5416	60.2922	80.9505	95.3411	86.4733	94.6033	90.7165	64.5489	73.6013	58.1703	44.8236	35.9474	27.2974	23.2262	22.9285	19.2639	31.5781	27.7686	34.2332	46.7417	50.2426	34.3573	48.5872	29.3812	38.3761	33.1989
220	77.6838	83.3457	66.6293	92.3031	82.4027	77.9085	94.5261	58.9594	82.3871	96.5894	81.2656	92.8124	90.4517	63.4805	73.1703	55.8322	44.4192	34.6131	27.386	23.3387	22.6111	19.9763	31.1193	28.0415	33.6114	46.1981	51.6424	34.6526	50.9927	28.9565	39.5998	32.5031
225	76.8102	80.7984	64.2592	91.5857	81.8576	77.2756	94.5458	60.7455	84.5855	97.3574	84.2362	93.8876	90.6617	62.4217	72.1888	55.9913	44.745	35.7703	26.8761	23.5592	22.3452	20.2462	31.3181	28.3744	34.2221	44.4309	52.408	35.0952	53.4992	28.9856	39.5569	32.0128
230	79.0591	82.4275	64.4912	91.6496	82.8096	74.5668	92.8632	61.7027	83.6665	97.1202	83.4648	92.1382	91.1018	65.1311	74.7946	55.678	46.7091	35.1036	26.5217	23.0491	22.9434	21.1426	32.0668	28.3745	34.2079	45.3743	51.7647	35.7517	52.2591	28.9588	39.1641	32.2704
235	80.0276	82.5234	65.9482	92.0966	82.1783	77.4206	92.9905	62.2754	81.1123	96.6685	84.4264	95.0735	90.9898	67.874	75.2199	55.0437	48.1932	36.1528	26.0137	23.4125	23.8385	21.2995	32.2094	29.0609	35.3818	48.1187	49.2656	37.2393	52.0039	28.1521	37.9904	32.5675
240	80.9193	83.5407	61.8768	91.4527	81.8025	78.8186	94.4652	63.2281	81.6885	96.9849	83.6532	94.557	89.9974	68.6428	73.5764	57.1047	47.9439	35.617	27.3549	22.9229	24.723	20.6067	32.9332	29.246	35.9316	46.0633	49.7937	35.912	52.0801	28.9271	37.9319	33.2786

## Sheet: Panel E
Panel B
Fold change in track duration (EHD2 I157Q-BFP was set to 1)
Cav1-mCh	EHD2 I157Q OE	Bodipy-LacCer	Bodipy-Chol
0.598795	1	1.49388	1.44048
0.695783	1	1.5	0.880952
0.584739	1	1.10612	1.00952
0.633935	1	0.932653	0.82619
0.694377	1	0.806122	0.875
0.560843	1	0.840816	0.822619
0.725301	1	1.04694	0.895238
0.465261	1	0.913661	0.85
0.400602	1	0.862249	0.654341
0.513052	1	1.00326	0.771006
0.521486	1	1.27795	1.28078
0.490562	1	1.14281	0.952345
0.719678	1	0.970948	0.872454
0.52008	1	0.656602	1.2681
0.470883	1	0.91513	1.09944
0.756224	1	0.92835	1.15017
0.567871	1		1.11339
	1		0.74818
	1		0.644196
