# Supplementary material for: Lipid accumulation controls the balance between surface connection and scission of caveolae
Source: eLife. 2020 May 4;9:e55038. doi: 10.7554/eLife.55038 (PMC7239661; doi:10.7554/eLife.55038)
Supplement: Figure 3—figure supplement 4—source data 1. [file elife-55038-fig3-figsupp4-data1.xlsx]

## Sheet: Panel B
Panel B
Control	Bodipy-LacCer
11.2	1.9
19.1	25.3
13.7	4.3
40.9	6
26.6	12
