# Supplementary material for: Lipid accumulation controls the balance between surface connection and scission of caveolae
Source: eLife. 2020 May 4;9:e55038. doi: 10.7554/eLife.55038 (PMC7239661; doi:10.7554/eLife.55038)
Supplement: Figure 3—source data 1. [file elife-55038-fig3-data1.xlsx]

## Sheet: Panel A
Panel A
Cav1-mCh (Control)	GM1	LacCer	Cer	Chol	SM C12	SM C5
0.7745	0.6772	0.6327	0.6232	0.5299	0.6873	0.7411
0.6879	0.5395	0.4641	0.6543	0.6335	0.7355	0.7715
0.6196	0.6841	0.696	0.7504	0.7321	0.5803	0.6727
0.7577	0.6221	0.4817	0.7617	0.6935	0.7123	0.6972
0.7961	0.6556	0.7901	0.8034	0.4988	0.6287	0.7593
0.784	0.6562	0.653	0.5975	0.6109	0.7466	0.7454
0.6686	0.6189	0.6241	0.7718	0.6993	0.7167	0.7937
0.7757	0.6963	0.6662	0.6751	0.5545	0.7892	0.6715
0.7386	0.6252	0.6278	0.7918	0.6194	0.7225	0.5902
0.7399	0.513	0.5909	0.7098	0.5842	0.7629	0.7843
0.83	0.6295	0.7492	0.7697	0.6478	0.7113	0.66
0.748	0.5693	0.7039	0.6974	0.6267	0.7087	0.7568
0.8115	0.601	0.6653	0.7073	0.6762	0.7093	0.5745
0.6522	0.6779	0.6769	0.7124	0.5352	0.6373	0.6186
0.7727	0.7232	0.6519	0.6778	0.6762	0.7686	0.7591
0.6578	0.6761	0.6055	0.6287	0.7578	0.7371	0.7025
0.7784	0.5717	0.6795	0.729	0.6271	0.8066	0.6829
0.7265	0.7263	0.7238	0.6526	0.6594	0.7179	0.7651
0.5518	0.579	0.6519	0.6705	0.6737	0.7949	0.6803
0.6885	0.7138	0.6133	0.7956	0.7036	0.6464	0.6904
0.6914	0.4389	0.6516	0.6462	0.7367	0.5397	0.721
0.6462	0.6067	0.7438	0.5815	0.6994	0.6935	0.7323
0.7178	0.587	0.7105	0.725	0.7104	0.7027	0.6463
0.7515	0.6466	0.7447	0.7132	0.764	0.784	0.6738
0.7365	0.5344	0.6603	0.7165	0.6876	0.6545	0.529
0.6589	0.5845	0.6644	0.6762	0.6155	0.617	0.6364
0.7343	0.6417	0.7514	0.7356	0.6576	0.6541	0.7438
0.7174	0.7269	0.7015	0.5171	0.6387	0.7307	0.6837
0.6261	0.709	0.6628	0.72	0.7071	0.7636	0.7147
0.7101	0.6329	0.628	0.708	0.6511	0.5931
0.7653	0.6997	0.5866	0.734	0.503	0.6192
0.7983	0.6904	0.6147	0.6606	0.7282	0.7268
0.7323	0.8265	0.7421	0.7037	0.7643	0.6678
0.7636	0.7848	0.6573	0.6892	0.7807	0.7738
0.7293	0.6618	0.6803	0.8056	0.5151	0.6565
0.6827	0.6725	0.6034	0.6222	0.6071	0.6763
0.6996	0.7344	0.7428	0.6096	0.637	0.7245
0.7615	0.5948	0.7407	0.6274	0.6168	0.7457
0.6315	0.604	0.7479	0.7424	0.6869	0.6407
0.7323	0.6107	0.527	0.6584	0.4442	0.6575
0.7336	0.6242	0.6621	0.713	0.6513	0.6999
0.6455	0.6334	0.6068	0.7101	0.5455	0.6617
0.7103	0.5229		0.7339	0.5763	0.7152
0.7491	0.55		0.807	0.6236	0.6554
0.6779	0.6148		0.6755	0.7601	0.713
0.6665	0.5615		0.638	0.561	0.7201
0.7209	0.6466		0.7561	0.5995	0.7242
0.7706	0.6092		0.5908	0.4723	0.6806
0.7619	0.5921		0.8029	0.6515	0.7017
0.7729	0.6645		0.7788	0.5926	0.7554
0.5997	0.7239		0.6454	0.3995	0.7032
0.6813	0.5073		0.8049	0.5009	0.6769
0.7112	0.6589		0.7641		0.694
0.755	0.5167		0.6144		0.7142
0.6978	0.7168		0.6694		0.786
0.6681	0.66		0.7268		0.6732
0.8106	0.7014		0.685		0.7118
0.6602	0.6145		0.8363		0.7068
0.7701	0.7658
0.7305	0.6933
0.6446	0.7904
0.7406	0.7863
0.7482	0.7478
0.6472
0.8133
0.7285
0.7848
0.6806

## Sheet: Panel B
Panel B
Cav1-mCh (Control)	GM1	LacCer	Cer	Chol	SM C12	SM C5
0.8603	0.8256	0.828	0.7189	0.7222	0.6418	0.8267
0.7406	0.8211	0.8198	0.7803	0.7446	0.7216	0.7936
0.7745	0.7018	0.8316	0.823	0.7694	0.7639	0.6576
0.7873	0.7177	0.8152	0.8556	0.7107	0.7706	0.8157
0.8028	0.8177	0.8506	0.7953	0.6358	0.7983	0.7693
0.8146	0.7596	0.8111	0.7459	0.6836	0.8639	0.7914
0.8096	0.8242	0.855	0.7158	0.7971	0.843	0.7973
0.7522	0.7875	0.7074	0.7288	0.6807	0.7199	0.7174
0.742	0.7667	0.7011	0.7152	0.612	0.7746	0.7346
0.8365	0.8051	0.7423	0.7955	0.728	0.8819	0.7697
0.7906	0.8171	0.733	0.7832	0.7449	0.7916	0.7897
0.7158	0.7572	0.8084	0.7076	0.7783	0.7234	0.7671
0.7583	0.7582	0.8057	0.785	0.7709	0.8315	0.8305
0.7029	0.7826	0.7908	0.7401	0.8223	0.7689	0.7911
0.7665	0.8018	0.8045	0.7475	0.8408	0.6743	0.7319
0.7749	0.6759	0.8011		0.8158	0.7801	0.8001
0.8012	0.7602	0.835		0.8324	0.8406	0.7604
0.8197	0.7963	0.8105		0.8003	0.8344	0.8435
0.776	0.8018	0.7467		0.8126	0.7866	0.8006
0.7776	0.8042	0.7208		0.8208	0.7734	0.7948
0.7296	0.8049	0.8243		0.7584	0.7693	0.7237
0.8563	0.7733	0.7236		0.8062	0.7588	0.8193
0.845	0.8663	0.8228		0.8176	0.7901	0.7343
0.8312	0.7553	0.8122		0.853	0.7374	0.769
0.8507	0.7899	0.7906		0.7784	0.8048	0.7952
0.7781	0.7513	0.8342		0.8128	0.7948	0.6992
0.7818	0.7515	0.8152		0.8114		0.7593
0.7452	0.7549	0.8015		0.7663		0.7608
	0.7623	0.791		0.7837		0.8112
	0.776	0.7745		0.757		0.7476
				0.8002		0.8613
				0.7395		0.7805
				0.7681		0.727
				0.8333		0.735
				0.7458		0.7349
				0.85		0.8005
				0.8214		0.7318
				0.8549		0.8465
				0.7627		0.7392
				0.8013		0.819
				0.7904		0.6611
				0.7338		0.7452
				0.8091		0.8171

## Sheet: Panel C
Panel C
Recovery after FRAP	Untreated																											Bodipy-LacCer
Time (s)	mCh FI	mCh FI	mCh FI	mCh FI	mCh FI	mCh FI	mCh FI	mCh FI	mCh FI	mCh FI	mCh FI	mCh FI	mCh FI	mCh FI	mCh FI	mCh FI	mCh FI	mCh FI	mCh FI	mCh FI	mCh FI	mCh FI	mCh FI	mCh FI	mCh FI	mCh FI	mCh FI	mCh FI	mCh FI	mCh FI	mCh FI	mCh FI	mCh FI	mCh FI	mCh FI	mCh FI	mCh FI	mCh FI	mCh FI	mCh FI	mCh FI	mCh FI	mCh FI	mCh FI	mCh FI	mCh FI	mCh FI	mCh FI	mCh FI
8	3.08695	4.3926	4.74906	4.88251	7.22091	2.96077	2.96077	4.97191	4.61278	3.53559	13.4009	9.96745	19.3916	5.01118	6.27431	28.076	6.90139	7.25197	8.8575	17.3983	17.3983	1.79696	4.22355	9.6795	4.62862	6.43766	6.62172	6.25226	2.49976	8.00901	4.52563	3.98828	12.2644	7.04446	4.20012	7.94233	9.14991	5.7748	8.72192	8.8839	9.80502	4.98235	22.4708	5.19815	7.07159	10.4362	8.63608	3.82385	5.17622
11	0.453979	3.90634	6.25456	4.96228	9.06105	3.84177	3.84177	4.47241	6.09929	5.41096	12.6866	10.4353	21.3923	3.50919	7.64216	24.5936	11.2138	11.1777	7.22033	22.0562	22.0562	3.65166	3.01189	11.4128	4.41419	8.09153	7.08517	8.15859	3.57692	11.481	7.42946	4.13709	13.2594	7.19238	4.32218	6.7865	7.84533	6.30321	7.88564	9.14071	8.40766	5.52932	16.111	6.83597	7.33492	8.72645	12.5758	6.1808	4.56816
14	8.66656	3.32245	5.6276	5.69423	9.51524	3.91237	3.91237	5.30247	6.88612	6.76326	13.4273	9.33059	20.3707	5.18822	7.28601	28.0014	5.77444	13.9228	8.70639	21.5706	21.5706	5.12286	6.44935	10.6689	7.92873	8.93519	6.52709	9.64173	3.6368	10.6309	8.56518	4.41737	15.2674	7.78269	4.08464	10.8051	9.17346	10.5104	9.35582	10.7255	9.43936	5.05164	11.2265	5.88782	5.76018	10.8698	10.6114	5.88129	3.76399
17	6.22902	5.10884	7.69933	5.67666	6.28978	5.59715	5.59715	4.23419	4.83905	6.24871	15.6248	7.49623	26.7297	7.32966	7.38354	20.3022	5.17867	15.3768	8.10036	20.3945	20.3945	8.13481	6.40135	9.79995	5.18174	10.7309	10.249	7.57605	6.62449	12.9483	7.25131	6.55242	12.9053	9.83156	5.50445	5.90765	11.726	9.69725	10.0442	9.77272	9.44708	9.09836	25.6395	4.78051	10.1082	7.55671	10.3131	4.21508	5.47966
20	4.08468	4.89917	9.76905	6.62904	9.33222	3.41448	3.41448	5.09191	7.38562	6.78896	20.0844	10.8082	25.4749	6.50162	9.29306	19.4535	6.96914	18.9085	8.36038	19.871	19.871	3.43966	8.07501	11.2876	7.26745	8.06194	7.34599	5.61343	9.89401	11.336	8.09581	7.2522	18.1392	8.7697	6.62362	9.89437	14.3813	7.17147	10.6036	7.6921	7.98899	14.9535	19.1185	8.73418	9.89781	12.2542	13.1145	5.49784	9.53351
23	2.30301	5.53444	8.75868	5.98561	7.50586	4.89234	4.89234	6.74789	9.26479	6.67629	17.2245	11.6401	27.5619	7.79692	9.656	19.033	8.35251	19.0024	8.34236	23.7102	23.7102	5.58705	8.93314	14.3298	5.17089	11.7116	9.35122	8.76385	7.95099	11.669	9.97565	8.0195	16.2737	11.079	6.00204	11.4452	9.63644	7.93836	11.7974	9.34639	10.0666	14.7547	19.8478	6.76558	11.885	10.7733	10.3068	7.04109	11.6697
26	7.5367	5.87479	8.72247	7.15084	9.50829	3.38626	3.38626	8.15945	9.20757	8.33857	18.8682	12.3973	26.7089	11.8796	8.71805	31.358	8.11615	18.6738	9.13208	21.2453	21.2453	2.70116	7.10155	18.7804	3.5365	7.56808	11.3557	8.40742	7.21931	13.7554	10.461	7.9795	15.2189	9.96611	8.60993	12.8007	19.0091	12.5952	13.6014	13.1684	13.9197	14.2878	12.3578	12.0491	12.1328	13.3841	11.6372	6.65449	9.60078
29	7.51189	4.75693	7.90378	8.9334	8.10725	9.81313	9.81313	6.54078	6.76262	11.0686	17.67	11.78	25.2677	14.6376	10.9074	30.0622	6.21115	18.9552	9.2344	23.9881	23.9881	5.81855	9.75213	13.6378	7.56315	12.6154	11.1352	8.12944	5.97416	14.1441	9.57023	9.03818	10.744	16.0146	11.0112	11.0583	16.2869	13.0595	12.6935	11.816	10.1273	15.594	25.7629	11.7885	12.4446	12.88	12.7853	7.88557	10.1015
32	11.7279	6.10278	8.76774	9.87234	8.82203	10.886	10.886	5.58725	10.9504	10.8105	16.3627	10.0833	29.3933	12.8472	11.518	25.757	11.9702	22.9052	10.0115	27.4392	27.4392	10.4949	4.6089	11.0603	8.03244	12.1037	9.96129	10.0927	6.08932	15.4432	10.8606	11.4178	14.4385	14.9832	9.05988	12.277	15.3159	12.23	13.3082	15.1666	2.96556	16.9859	47.8885	9.14708	13.1273	11.5201	20.7704	7.37654	11.5419
35	14.9041	5.8773	8.30827	10.3344	11.4955	10.5319	10.5319	7.57658	8.45104	8.75621	22.7409	11.0463	28.1019	14.449	11.2236	34.2406	12.1316	25.483	10.0817	25.3873	25.3873	10.76	9.34385	12.6259	10.5431	11.6109	11.46	10.379	8.3829	14.8535	10.0455	10.9573	14.163	13.161	8.36534	14.6432	17.3054	13.0404	15.6881	11.8139	13.029	17.0199	48.1763	10.4882	15.2637	12.4434	11.4162	5.16627	14.5035
38	13.5191	6.87088	10.708	10.9048	10.377	12.7801	12.7801	7.12154	9.11354	10.2263	19.4994	8.20583	35.3222	15.8163	11.564	38.1051	11.3329	23.9012	17.2408	31.8085	31.8085	11.2373	8.44723	13.1583	9.81177	12.0749	11.5059	11.8425	7.41884	17.7996	12.3105	12.8099	20.4725	17.9853	9.81085	9.89488	18.7853	14.9038	13.1523	15.3117	10.812	17.6599	50.4036	21.0781	14.8642	13.0668	14.8272	6.62052	14.1889
41	9.22948	8.0462	8.17542	8.40508	8.52127	11.1686	11.1686	8.23861	9.67691	9.24348	21.3535	12.5629	26.6146	15.9202	13.3877	25.0623	5.91443	25.2638	17.2357	29.4413	29.4413	12.2459	11.1124	13.5309	8.42619	12.9309	11.8048	12.4753	6.76365	16.5805	12.8643	14.2389	19.6308	13.4607	9.84885	12.805	17.297	14.0131	11.2103	13.9533	7.65294	19.5267	52.7304	9.1276	15.7356	14.466	14.1169	7.64893	14.075
44	9.35636	8.73068	11.6188	10.2415	10.2984	7.81328	7.81328	11.4908	9.0693	10.8165	25.3225	11.4695	29.6552	14.5466	15.3245	32.4753	9.88253	24.662	23.6052	29.5189	29.5189	10.9988	10.7475	11.9199	11.0905	12.1872	11.4573	11.1321	6.42237	17.6822	12.1141	12.642	19.1471	12.7427	11.3808	11.8705	19.8891	14.0345	16.0946	9.80168	8.43209	19.9934	40.8084	8.29832	17.1605	15.058	15.2395	9.38434	18.2049
47	13.9266	7.72977	11.4408	9.7198	9.47922	7.93022	7.93022	12.4841	9.50858	11.2038	19.6109	10.6224	40.8457	14.5948	14.124	39.4599	7.08781	24.1428	25.3859	32.2497	32.2497	9.19649	13.0696	13.8628	10.3478	16.9227	10.4085	11.6766	7.84847	16.8763	16.7873	14.4664	18.6963	11.6755	11.4094	11.0453	17.8635	18.6631	12.1685	13.0939	15.433	15.2719	38.6045	7.67809	18.1328	9.3656	17.5903	10.2572	18.4927
50	11.5995	9.72902	11.6635	9.98729	12.2361	7.77259	7.77259	12.2377	10.9452	11.2578	16.8258	10.7549	35.5631	18.5965	12.4854	43.9833	10.2122	30.8962	20.8508	27.4216	27.4216	10.7587	14.0241	12.8885	8.03591	11.8279	12.6839	12.2479	7.08828	17.0122	11.8603	13.9259	19.6729	16.7781	8.39047	14.0488	18.3269	18.4388	18.7754	16.401	17.6071	23.3743	29.7436	11.823	15.8126	14.8926	19.8978	8.86323	17.5389
53	12.2473	11.4546	15.6743	11.9511	14.1075	12.1427	12.1427	11.7778	10.3089	12.1236	22.6745	8.73629	28.2572	17.903	12.6584	47.9085	11.3765	29.0236	20.0763	29.7443	29.7443	11.0188	12.6086	17.1479	6.84318	11.1368	12.5614	14.4363	8.07779	20.4214	15.9157	17.5406	22.0421	11.0878	12.1054	14.5113	19.6274	16.3829	14.4791	16.1906	15.7111	28.855	36.0191	8.78782	11.3347	13.8387	21.9666	9.79527	18.9694
56	19.1188	11.14	14.3116	14.2225	15.1431	10.7654	10.7654	12.7583	10.6214	14.1226	22.7042	12.8662	37.609	17.9887	13.7309	38.4643	17.5544	34.6583	16.4282	27.5894	27.5894	10.522	15.1901	18.1585	9.47166	13.0683	12.3216	17.8894	9.02113	19.566	14.2225	15.2338	22.9575	10.193	12.6874	16.3037	24.7284	17.0096	14.0307	13.5973	11.4284	18.6167	29.7551	8.41705	15.4176	15.4325	21.4716	9.25212	22.9248
59	16.6276	12.7091	13.8107	12.7704	18.5123	12.1096	12.1096	12.5035	9.80993	15.3078	25.9207	16.2802	33.4974	18.2819	12.489	30.706	15.8558	33.3721	16.5452	26.7008	26.7008	9.60311	12.719	19.2225	12.3505	14.0417	12.0568	19.7049	9.81488	18.9723	18.3473	16.1517	19.9964	12.9277	13.8909	14.3778	18.8927	19.0483	14.997	15.846	14.3124	22.4976	20.5214	9.96164	16.053	12.7238	18.8068	7.47524	23.7681
62	12.9019	12.8444	16.1238	9.9077	20.0113	14.5907	14.5907	14.2788	12.4133	14.8983	22.5164	12.8282	30.6273	13.6987	14.7342	48.099	11.1785	34.658	17.9073	36.5765	36.5765	11.7851	10.852	21.4819	11.0218	12.6115	10.3802	17.462	10.3351	20.2831	13.5163	17.0648	22.3177	12.5145	14.163	11.7767	19.1222	19.0003	12.6528	11.8469	16.1407	21.0308	25.3557	7.53301	14.3245	16.676	20.6393	9.22832	20.7003
65	24.5715	15.0168	16.2066	15.2966	14.241	16.7964	16.7964	13.4068	11.3213	18.5085	23.8749	11.0852	25.8431	16.9103	16.242	38.5218	16.5314	29.4286	17.1704	29.6989	29.6989	11.3098	8.54026	25.114	13.1648	18.5509	12.289	12.5124	11.9611	20.6777	11.2569	17.2507	25.3252	14.9407	15.3317	11.9119	23.2848	18.8013	19.3391	15.517	20.5369	21.8262	41.7316	9.78301	16.4387	16.8881	15.6108	8.2324	25.7519
68	21.287	14.0294	14.7319	15.8713	17.7291	14.7181	14.7181	12.7451	10.6322	20.2493	22.5893	8.62182	31.6638	20.1974	16.2652	42.4385	14.5514	29.5228	15.1973	28.874	28.874	13.1182	12.9929	21.6233	15.3182	11.8703	10.9642	12.5367	11.8186	23.628	17.9561	18.415	29.5114	11.8597	16.1856	14.1904	21.189	13.9213	19.6387	12.0809	23.7369	20.1056	31.8355	8.4323	18.3859	17.1592	17.9877	10.0332	26.5517
71	19.4649	14.2401	14.0491	14.2719	17.5395	11.5997	11.5997	13.6525	12.5664	17.3408	23.4237	12.2096	31.1364	21.5686	14.7443	36.9984	13.5512	29.6198	16.2843	27.996	27.996	11.4663	11.8483	19.4229	11.8908	16.2871	13.4995	13.8852	10.9801	26.5358	19.0162	18.4707	28.4198	13.2735	15.6751	14.8408	24.0404	15.9424	15.9112	18.5175	21.4812	22.824	22.4681	7.62765	15.1716	16.2202	17.9068	7.85384	28.744
74	26.6391	15.1873	12.6721	13.0862	16.0721	18.1226	18.1226	15.242	14.7365	18.4202	24.7468	14.5763	27.7365	21.8522	15.6922	31.1035	9.35566	34.6424	17.088	25.0631	25.0631	13.6908	12.6182	24.0129	13.9089	8.16184	12.3544	16.4053	12.9775	26.0784	15.8056	18.7661	26.255	14.8729	16.7509	16.2029	26.0928	16.9498	17.5784	15.5007	22.0861	19.7291	40.4279	8.99409	16.6213	18.5573	19.1148	10.4704	24.9193
77	25.667	17.3561	14.68	11.7382	18.6667	16.1907	16.1907	14.4463	14.0247	19.4624	29.9162	12.91	34.7462	20.07	15.5819	31.7329	10.4579	35.132	18.9504	27.2887	27.2887	11.9566	14.6672	18.4221	15.4983	14.1656	15.6523	16.1599	11.2336	23.4259	16.3095	21.3497	29.753	13.6437	16.2394	15.4451	25.1856	15.3595	19.4166	18.8914	24.2496	22.1631	38.1189	8.59038	18.4054	11.9792	23.0951	11.0402	35.5745
80	19.9283	15.3429	15.6925	14.3971	15.3096	15.8047	15.8047	14.6234	13.5777	20.4283	30.5011	12.8195	34.2718	22.6526	16.3831	36.8812	15.9654	37.4822	16.4122	28.8571	28.8571	10.0601	15.349	20.2091	14.9862	13.4243	14.5244	18.0338	13.4982	24.8561	17.7698	20.0728	23.5244	14.1574	14.4961	15.9472	22.4482	26.2352	17.2828	17.2273	22.3117	22.6622	27.546	9.43902	20.9699	21.9568	20.5068	7.33798	36.5055
83	21.4884	18.273	20.1665	14.6476	15.7719	15.9152	15.9152	11.9487	14.9183	20.2425	26.3934	11.1942	37.0673	24.9075	14.9155	36.504	16.7222	35.4884	17.8565	26.3219	26.3219	9.53886	10.8996	20.7766	14.0045	10.3318	14.2758	22.6466	13.8272	24.7663	17.9525	21.5906	23.3918	15.8581	16.4891	19.4688	26.9224	26.5269	17.7283	18.4093	16.8612	21.6817	31.894	9.31054	20.5048	20.4522	22.2449	9.15803	29.3128
87	26.6306	14.0604	21.0979	15.2652	15.4165	17.6601	17.6601	16.2014	12.8943	25.0489	27.4122	12.3717	27.0155	23.7875	15.5393	39.063	20.6454	39.3686	16.56	32.4041	32.4041	8.16503	10.1204	32.9439	13.5039	16.2485	14.0574	17.844	13.7326	26.5588	17.9176	21.3246	27.5825	16.8642	16.9056	17.9403	25.9042	19.5787	18.0714	24.429	16.0873	23.824	42.1427	9.30954	22.3073	18.1634	30.3342	8.44798	33.165
89	29.795	15.9447	21.552	14.7891	18.0515	18.6368	18.6368	16.1768	15.5998	21.2036	35.584	12.8214	25.4133	22.749	18.3892	38.532	18.1978	43.1724	17.5171	32.387	32.387	10.1179	14.4397	26.1283	14.5882	11.8767	17.165	18.2102	13.336	27.4629	15.3158	20.9315	24.2883	16.2564	15.544	21.0366	25.4333	23.0964	22.6768	20.6596	22.439	23.6022	41.6251	9.26209	24.6421	23.4657	30.8405	12.6099	34.0064
92	27.9222	16.9081	21.2537	12.706	17.5657	19.6375	19.6375	17.5719	14.2831	22.7923	36.5237	13.3686	30.7955	24.063	14.7387	29.0848	22.171	37.7006	17.2899	30.5428	30.5428	10.8508	11.6819	27.5089	17.9404	12.2395	18.8169	21.472	12.1161	28.971	19.5776	23.7153	25.9403	19.1307	18.2511	20.7146	29.2356	22.4813	16.2741	22.1656	22.1507	23.2261	37.4093	9.83846	25.8189	22.1209	27.9138	9.45595	29.9528
95	17.4955	15.823	25.3749	16.0664	11.8146	15.7104	15.7104	14.7963	14.9866	22.106	33.454	11.0881	30.764	24.3027	16.2946	42.9093	22.3059	39.7208	15.7599	31.7391	31.7391	10.0583	14.1189	27.3144	21.567	13.4875	19.4976	22.752	10.653	27.9161	17.9398	25.7375	24.4524	18.4341	18.8672	17.4598	26.3739	21.6384	21.9806	17.5482	23.7511	20.956	43.3605	10.239	24.0505	23.569	24.5346	10.7613	24.7558
98	21.0138	16.1369	27.2354	15.3341	14.9369	19.2411	19.2411	17.1152	16.8591	19.929	35.6201	15.9154	36.2643	24.5965	16.7983	33.2693	20.8734	37.1205	16.7953	28.6173	28.6173	8.11816	15.0371	22.1047	25.9426	15.8505	22.2448	26.5454	13.0684	29.2606	20.424	24.6128	23.8761	29.3053	18.8686	19.8453	27.667	18.6769	21.5157	19.6689	18.4582	22.58	44.0786	10.0092	21.6081	19.4064	19.7543	11.2793	25.7725
101	20.5918	18.5644	25.116	18.4992	17.9155	18.969	18.969	19.2549	12.8247	20.6321	35.036	14.6083	33.8376	25.5184	13.6401	40.7567	23.5631	48.2928	16.4708	34.7823	34.7823	9.85361	16.0352	27.0814	16.0587	16.71	22.1183	26.8621	12.2735	29.4337	21.303	24.1946	23.8861	25.4815	19.1791	19.3221	28.6865	22.6631	23.4782	22.5361	21.8214	22.8478	44.9145	12.9859	22.4482	14.9461	20.2923	10.3319	30.3709
104	14.8853	15.399	19.4254	14.1587	13.9359	16.1233	16.1233	14.7042	13.7625	19.5032	34.7372	9.95588	36.3294	25.0117	13.3186	33.8301	20.4077	49.8518	15.7567	40.6292	40.6292	12.2213	17.1757	27.8255	19.7859	15.0092	22.5951	29.2037	11.6718	31.0449	21.0544	25.9044	31.1425	29.7937	22.7897	24.4648	29.6042	21.8387	23.5283	23.2574	25.3533	23.6319	45.0592	10.0955	24.1911	21.8293	21.7416	9.47662	33.7884
107	16.3879	16.8928	20.9276	18.1351	14.8636	18.0284	18.0284	13.7007	13.4826	23.9032	32.6277	14.6372	30.9987	26.8249	14.9518	31.564	20.5765	43.3016	19.1842	34.485	34.485	9.51069	14.3298	18.4126	18.788	13.1129	19.4322	31.1283	11.3133	34.3969	14.194	24.953	32.7957	23.1154	28.7086	21.0879	30.1074	27.446	21.1731	21.5451	18.1055	24.8101	39.8236	9.72774	23.7167	20.563	21.7088	11.5244	32.4768
110	16.24	17.1617	20.8934	22.017	16.5155	17.8591	17.8591	14.8635	15.3675	22.7695	32.6555	17.0073	38.934	26.8829	13.7034	39.1208	17.9873	43.3352	19.6639	30.9117	30.9117	9.91039	16.9099	26.4929	17.9016	16.001	21.0718	32.4288	12.1785	31.2939	20.168	24.42	25.348	21.6422	24.2305	26.3386	29.2892	26.3824	30.8895	21.5804	19.4518	29.5432	40.3582	9.8561	28.1211	24.4759	26.7305	12.5675	41.5743
113	18.9401	20.0432	24.6756	20.31	17.8257	16.9629	16.9629	13.2611	16.3275	24.4272	34.0691	15.2887	30.1157	29.7731	16.9843	36.9516	22.7816	42.5912	16.8729	33.6392	33.6392	10.3709	15.5902	21.2595	17.9971	23.4546	20.0537	29.9138	12.9871	34.3331	18.4084	25.6851	21.2898	21.5316	25.9107	26.9187	29.6136	20.033	23.5499	19.2766	19.9444	28.8482	35.2543	11.3991	21.6562	30.3682	28.6128	11.0297	44.1596
116	21.5969	20.386	22.5513	19.5178	17.3963	17.2839	17.2839	15.3462	18.1799	24.8521	33.41	23.5857	39.3611	24.3289	16.1171	31.354	19.7843	47.0363	16.5798	39.0438	39.0438	10.7781	16.0444	20.6323	15.8369	16.5258	18.0937	35.1912	17.4978	35.5344	21.1507	27.3098	25.1693	22.6806	22.9019	26.4067	27.8711	19.3739	26.217	20.1436	29.7614	27.522	28.2998	10.0988	27.7781	28.0917	26.9744	11.2796	46.6198
119	25.1088	20.4042	24.6247	19.77	16.6045	20.6326	20.6326	17.1452	16.5676	23.9037	31.7346	16.0283	35.1536	27.7605	17.3863	32.9241	17.8781	45.044	16.2714	33.381	33.381	12.7014	18.9095	24.697	19.2482	15.2198	19.7962	35.7249	14.1019	35.8387	19.9895	28.1667	29.1297	20.3327	23.6991	28.149	26.4786	19.7706	22.8791	19.3796	19.9797	28.7582	40.1625	10.4678	30.2999	31.9369	25.1898	11.0456	42.6253
122	22.9551	19.0648	22.1494	19.288	15.1365	18.5999	18.5999	16.9763	14.5579	18.4157	29.9257	23.0975	43.6187	25.4482	16.4638	39.4465	15.3696	49.8747	17.6708	29.5494	29.5494	12.4072	14.6449	24.7773	19.4927	17.7321	18.8603	33.6715	14.9336	34.7463	21.4616	28.9978	35.5093	24.5892	25.7287	30.7446	26.4762	20.5461	25.3312	18.5453	20.7643	27.6999	43.1805	10.4757	29.1792	33.124	25.4167	12.2131	40.1577
125	21.9809	19.5527	21.6758	17.9676	17.8348	18.5851	18.5851	19.2122	16.4193	22.9546	35.4534	18.4811	29.2276	25.9736	20.0654	31.9575	17.738	51.0284	15.7034	35.2648	35.2648	12.7531	16.2115	24.0966	19.6643	13.3163	19.6713	38.2629	16.5787	33.7589	20.7361	28.7514	26.7403	27.7948	24.7226	35.3452	27.5365	17.3185	20.307	23.3804	22.1693	25.309	30.5992	9.29996	35.8306	23.7087	22.062	10.9964	45.9265
128	21.7355	19.849	23.4024	20.0814	20.5753	19.7306	19.7306	16.7614	14.2767	19.8687	33.6339	19.8797	38.2411	24.4866	19.2048	36.6833	16.6841	47.3099	14.944	35.6383	35.6383	16.217	16.3338	19.4959	18.7611	15.1201	22.6015	37.1557	16.3545	41.7142	21.5892	28.9271	23.9009	27.3859	27.2709	25.6767	27.0026	19.5929	23.31	26.7271	23.6091	22.8107	33.0381	13.7798	27.9134	23.9485	25.4321	10.7378	45.8244
131	26.4771	20.2077	21.587	15.1493	21.3799	22.3992	22.3992	18.6197	15.6245	19.4514	37.886	22.3658	39.7382	24.2645	20.7236	38.1945	13.9312	45.0096	17.3868	35.3135	35.3135	13.1962	14.4972	22.9004	13.2859	21.0645	20.9638	37.3662	19.9083	34.8584	21.842	28.088	27.2531	25.2366	24.5009	28.7972	29.4861	25.5657	28.7731	23.6435	25.4322	29.1262	38.7156	14.1137	27.2013	25.2251	24.3017	10.0504	46.9669
134	18.9028	19.3602	24.2573	14.2416	18.5501	22.3834	22.3834	21.77	15.2633	20.077	38.615	17.3306	38.8496	28.4154	18.1738	36.919	13.3638	49.0101	18.3965	33.3112	33.3112	12.3254	20.755	22.4429	18.0264	18.9985	19.8785	41.0801	20.7253	40.2134	30.3141	29.7172	25.2304	26.2091	26.7626	32.78	27.132	19.5533	24.4896	21.2479	22.8838	29.4058	43.306	11.1238	22.8435	23.1239	25.1343	12.2564	46.5093
137	21.5025	21.7002	28.2832	12.7889	19.6849	16.9534	16.9534	19.4843	15.9677	23.2016	38.4145	15.5431	40.1381	26.326	17.4639	43.2101	11.5227	42.7167	16.9869	35.1698	35.1698	13.7713	17.1111	21.7035	14.9597	14.6514	16.8355	44.9231	19.9589	33.6825	31.0922	29.5766	32.3798	24.4126	21.933	32.7695	27.0743	23.6716	28.8234	28.8589	26.3145	31.783	34.4875	13.9213	24.0726	25.6249	21.5659	10.9544	43.336
140	20.1984	21.845	33.275	12.6673	17.2809	19.5716	19.5716	21.5184	16.1383	21.8585	33.585	22.0223	43.7048	34.1712	16.652	40.0453	16.9865	50.5566	16.2483	41.109	41.109	14.6907	16.6296	25.1002	18.4442	15.1912	19.1658	41.9283	17.5095	38.2857	25.6322	27.8545	29.4061	22.0069	26.8836	29.5089	26.0021	20.7142	31.5748	25.5201	27.374	25.8013	39.6347	11.8218	21.4334	26.9936	26.0955	11.8366	51.3673
143	27.6941	21.87	35.0345	14.083	24.364	21.029	21.029	27.0512	21.136	16.955	40.426	29.1211	40.2391	32.7635	17.1225	39.8836	20.9616	39.6049	16.7179	35.6837	35.6837	15.1019	15.2226	21.4442	18.6305	16.1756	17.2665	42.9665	17.1682	41.3793	28.161	29.7274	25.3057	25.9665	28.7314	32.5922	29.4011	20.0578	22.4581	28.6865	29.087	28.2444	48.7984	12.8109	27.3077	24.3004	25.8993	13.4668	46.8465
146	24.3208	23.5197	34.7625	15.1082	23.7401	19.7676	19.7676	23.9425	22.1632	19.4469	42.5958	26.5318	36.4308	29.8357	19.1644	34.8678	21.5862	43.6672	14.7881	27.4179	27.4179	17.2706	15.6084	18.477	23.34	15.5436	18.3467	38.7841	16.2821	45.1591	23.1137	29.5538	33.8614	27.8747	27.2092	32.1337	28.4352	20.7268	28.4897	24.5707	27.9576	29.7684	46.2263	14.7709	31.6251	29.15	27.876	15.0581	42.5991
149	23.026	25.6391	31.2585	17.9182	20.9691	27.3645	27.3645	26.8621	20.3445	16.0599	40.8309	26.8339	45.2376	27.4231	18.0435	37.5718	16.9902	45.4257	17.1417	27.2081	27.2081	12.2162	13.7032	16.267	28.553	14.9287	18.5226	35.3437	15.3832	43.1853	31.2253	29.0663	39.0114	25.5302	27.6387	31.7977	28.641	23.8452	30.8859	28.1999	23.3071	28.4337	46.5031	13.6267	31.1656	25.4999	29.5125	12.3127	43.8595
152	24.7601	26.607	37.9978	16.8109	21.2346	21.4761	21.4761	21.8652	20.1549	14.317	39.5462	26.8106	44.9607	33.6876	19.7518	39.9663	17.9601	45.0048	17.9166	28.4254	28.4254	11.9613	18.2144	20.3037	24.0884	15.0772	20.6605	33.3413	17.9354	41.5994	29.5294	30.8155	47.2666	22.382	28.5162	35.5497	28.5415	25.2034	31.5073	24.4886	30.3727	24.8015	38.5048	13.0604	36.0828	25.3081	22.0001	12.4724	46.7459
155	22.5571	24.4728	37.5987	14.6803	24.6913	26.2995	26.2995	22.9485	22.3736	14.5492	35.1087	24.4978	43.2184	30.8786	19.8775	41.8028	19.7742	45.8738	17.5506	32.9713	32.9713	15.1226	18.6794	21.3349	26.6341	17.6488	20.1589	33.1191	16.7165	40.5926	29.4155	29.5628	39.3862	25.8067	29.9694	37.8143	27.3048	26.1699	24.9454	23.6345	36.2274	30.5326	45.3029	12.8708	46.2814	24.4871	44.6728	13.1385	40.6153
158	25.3173	22.5909	32.1867	16.7171	24.834	27.0509	27.0509	23.4661	15.0164	15.0641	33.2191	24.5628	47.254	31.5592	20.9279	46.149	16.9257	50.4963	18.7672	31.3376	31.3376	16.8085	17.2454	17.6561	24.2615	12.2309	26.7305	28.2803	16.0197	43.2722	26.1895	32.8548	43.2445	26.4321	25.8497	33.5255	30.9799	27.1097	25.5249	22.7228	32.0907	31.6083	50.2268	15.3939	36.3719	24.5254	42.5796	15.4646	36.8184
161	25.2441	22.9688	30.7494	19.1894	27.2984	26.922	26.922	23.6554	17.0792	16.6768	34.9626	24.1701	46.2921	35.8916	19.5976	33.1888	17.8456	44.9795	18.8178	32.7796	32.7796	16.3466	15.1507	20.1727	23.7548	16.507	24.6393	36.3043	16.9277	42.4717	22.3806	32.6537	50.8668	31.6866	28.6146	33.3681	30.3418	27.4028	29.9547	22.385	25.7272	32.7125	42.2243	13.9479	45.2672	30.3569	37.1781	13.1645	38.2544
164	25.0859	25.721	41.0754	18.5454	22.1503	27.2881	27.2881	25.0722	18.9135	20.7711	32.0993	26.7749	39.3643	40.8135	20.9425	34.3034	24.1921	44.7875	17.267	29.6467	29.6467	16.2162	17.725	25.0838	19.2398	17.03	25.4386	33.0738	16.5948	40.0806	24.4768	33.4575	58.5768	32.3155	28.2614	39.5107	31.7975	28.3251	31.8053	22.8604	36.6575	33.7277	47.4592	13.7457	41.6376	19.6298	38.7032	13.1219	35.3061
168	24.8502	23.8716	39.3669	17.601	23.2196	28.2248	28.2248	31.5231	20.3865	21.0524	31.4491	31.0641	39.9522	41.7742	21.1294	39.5419	24.047	45.3768	17.2165	29.1175	29.1175	24.015	18.8429	26.8774	18.8773	14.6737	22.1588	38.2467	14.6739	41.8026	24.2929	32.3541	50.5776	32.2142	26.8154	35.4636	32.5055	29.4351	30.0095	21.7864	30.6256	32.7374	60.2208	19.381	38.6062	25.7508	40.3147	19.8098	34.1578
170	23.4657	22.6556	33.038	18.6158	22.1372	27.1822	27.1822	30.1743	25.5936	22.8242	26.2697	28.8274	44.144	38.4576	21.0809	38.2443	20.8742	48.752	15.3874	31.0531	31.0531	19.2758	16.5566	26.4889	20.8131	19.7507	19.9455	35.8045	15.2716	43.4091	26.7837	32.9198	50.4362	23.0808	27.3756	35.613	32.2053	32.0995	29.7538	18.5566	32.7235	37.7105	45.0513	14.4738	32.2085	21.4614	43.7357	18.9296	31.3367
173	24.8399	21.1143	27.2306	20.2583	19.0654	27.1883	27.1883	25.4886	25.4655	18.1793	31.383	29.2924	38.3013	39.5983	19.5515	36.1644	22.0254	42.7603	15.0852	28.6016	28.6016	13.8245	14.094	26.7819	23.7755	19.0092	22.2383	31.9179	16.9353	41.2784	29.8878	31.6849	47.8243	23.8077	29.5835	37.4476	33.7523	31.1262	29.5662	24.2155	25.0514	31.2592	36.2815	13.4566	36.1707	17.7975	43.6723	19.0832	28.6667
176	25.2576	24.9003	31.9495	19.0409	24.2917	23.4174	23.4174	20.7052	26.9864	17.8323	25.5771	27.9312	40.4861	38.2948	19.0276	34.7418	17.9028	45.8139	15.6455	25.2868	25.2868	16.8024	11.8481	29.1122	22.7289	17.8606	23.3816	31.034	16.1296	42.3766	27.8538	32.4139	44.6765	19.8381	30.5012	37.1047	34.347	31.3637	28.2496	24.299	34.6176	29.5232	39.2443	15.6869	43.6867	20.5155	41.7938	16.2932	35.0542
179	23.8079	23.8977	34.1627	21.357	23.1985	22.6481	22.6481	19.3563	21.4069	19.7749	33.4977	25.597	43.8063	37.7575	17.7671	33.4176	14.7534	42.9673	15.4673	22.9064	22.9064	15.1761	19.0908	25.9775	21.0952	21.5817	20.9738	34.3061	16.2696	44.7913	33.4339	31.2154	53.7901	24.559	27.6376	36.9848	32.5373	30.5632	31.0966	22.5895	24.942	29.3389	41.7714	15.5012	45.9678	23.8108	58.4457	18.1087	29.1449
182	29.2375	23.2236	32.886	22.6287	20.477	24.9538	24.9538	22.8483	24.138	18.9917	37.3217	29.5418	45.6625	34.1999	17.2445	31.0842	14.746	45.3644	18.3723	28.7101	28.7101	14.9548	12.7266	30.0514	20.4663	21.9849	20.6996	35.8626	16.5411	42.593	31.9466	32.6941	48.1551	23.1024	26.6171	38.4349	31.9679	33.8991	30.7421	23.3395	23.5451	29.4303	41.6531	15.9362	53.6863	22.8148	57.1416	19.5947	32.3126
185	28.2304	23.0609	37.4913	20.1664	22.0978	23.8245	23.8245	20.1891	23.384	21.5341	36.5367	23.6921	40.1812	37.4757	18.6902	46.1916	19.4726	44.4919	19.0627	32.8489	32.8489	19.6934	15.2791	31.6158	19.3684	17.9372	21.922	32.4365	16.4739	45.2752	26.316	33.8607	54.4798	20.7966	27.906	39.4646	30.9198	33.2603	35.7343	23.0438	31.5992	34.4285	44.7576	15.4235	59.6993	20.2412	54.8863	19.9857	21.5829
188	35.1895	23.6361	34.2377	20.0293	27.7539	24.7274	24.7274	23.6392	24.6471	18.3694	29.0621	26.1519	38.1469	31.6854	19.4357	39.4609	13.8389	54.2585	20.2039	35.8473	35.8473	16.3971	15.5602	36.3221	22.5456	22.4116	21.4059	31.8038	16.695	48.1302	28.7744	34.2432	54.0635	23.7991	30.5809	34.3385	26.8519	32.7503	39.6627	19.0955	31.9634	36.726	48.0135	22.228	58.7577	22.7757	50.0068	18.6633	26.6846
191	20.8952	22.2691	35.0995	18.4915	28.1431	27.3439	27.3439	19.2327	23.8815	14.1205	29.5443	25.539	44.717	42.1675	20.8248	36.1022	21.539	45.6926	17.0524	37.6532	37.6532	16.9341	15.5095	44.2776	23.9278	21.9494	20.6206	30.3884	16.8808	43.9931	30.3894	34.8465	54.6349	20.1159	27.7628	40.4548	28.7117	43.1292	35.7698	20.5267	28.917	32.3643	49.9634	25.6314	49.9616	30.3078	42.7323	19.2351	26.4506
194	19.1729	24.1354	33.5678	16.4968	27.6222	28.5879	28.5879	19.272	22.8031	15.4232	31.0656	23.4231	38.0448	39.2066	16.4574	44.0817	16.994	49.1364	19.1093	36.9946	36.9946	16.937	9.50891	30.3033	22.4828	21.9084	21.7071	36.4387	17.4784	43.0646	30.7801	34.8253	53.1317	23.4525	28.8858	42.142	32.4046	41.0954	34.2845	22.735	35.3181	39.9538	56.4302	18.5275	44.0162	22.8295	57.9717	22.0443	30.3776
197	19.91	22.0571	33.4798	19.9429	25.2965	29.2892	29.2892	21.5453	24.2417	15.9513	32.9047	29.9105	44.334	36.4774	19.1287	48.3878	14.645	51.3402	17.1985	32.2802	32.2802	14.0889	15.3747	32.8599	22.1251	26.1809	19.3949	41.8399	17.9816	46.4362	34.08	32.7025	59.0825	27.8516	32.7446	42.8389	32.5432	42.2268	29.9214	27.7645	32.559	48.4654	55.4808	17.2085	44.7255	24.8175	58.5445	16.4619	35.9592
200	16.8243	22.6542	30.6408	19.4024	24.7431	27.4529	27.4529	20.318	25.374	14.8672	34.5732	20.9118	35.5167	38.8787	15.6535	42.505	13.7663	48.0468	16.4043	35.0278	35.0278	13.6024	15.2492	30.7689	22.9887	23.9632	19.4409	40.0114	16.4876	51.537	32.2269	35.6506	48.8867	24.0376	31.7251	40.8245	33.0621	38.4705	30.9067	25.0179	34.2261	52.7567	44.4602	22.2444	42.2943	25.329	46.8445	18.8436	38.3755
203	19.5122	23.7678	30.8144	22.0297	23.3998	27.4419	27.4419	17.575	27.4161	16.4438	41.3244	30.206	36.8357	40.6369	17.6747	39.4777	14.0667	58.5375	19.0104	35.5635	35.5635	18.2783	18.6884	22.3819	22.1184	22.8055	19.8465	39.2409	16.6716	50.5832	27.6589	35.5353	48.0275	32.7217	33.0095	41.5819	32.8835	42.4172	33.1046	25.8321	27.7298	59.623	45.8817	25.3234	48.0585	28.3546	41.5233	16.9204	35.62
206	24.6054	21.5727	28.323	21.5661	26.3996	33.3774	33.3774	17.7846	29.1525	18.1566	35.3506	29.7411	40.2754	36.661	17.8461	54.3747	14.1268	51.1881	17.1439	36.0869	36.0869	16.1748	17.4816	33.6407	22.0319	29.3172	19.9626	40.2589	19.7993	54.4653	24.6495	35.0032	55.5091	27.4637	32.3746	53.2198	35.0291	42.5474	31.3953	29.4906	28.6155	61.3823	33.6289	29.5314	47.6172	32.0663	50.3192	24.3742	37.4532
209	17.5081	24.2771	34.2872	20.7792	24.19	30.4802	30.4802	14.2356	28.2581	18.778	34.2737	19.5516	32.7427	39.7528	17.9666	46.4394	21.3931	64.0402	17.1465	28.5087	28.5087	15.3959	18.2037	29.7598	21.7193	27.2037	21.0301	42.8653	17.6819	48.2747	28.4929	37.2312	59.6123	31.0762	28.1024	48.2122	35.9995	41.2175	34.8629	29.8527	30.4216	57.4396	34.7467	28.8409	51.3512	29.6838	51.3486	24.5284	32.238
212	15.5467	26.699	30.8384	19.5051	24.5183	31.4905	31.4905	19.6687	26.0298	16.9885	26.9812	19.1493	35.7972	36.4487	20.1196	44.7695	18.1592	57.1957	15.7282	29.1057	29.1057	21.1509	21.2419	39.4532	20.3668	24.211	21.1744	43.0418	17.658	48.9667	29.808	35.9881	54.6775	33.2177	31.2144	44.0063	37.4643	42.2939	32.1173	30.6881	23.033	59.2696	42.2968	29.4779	55.4138	22.6944	44.7214	25.9551	32.0281
215	15.0532	25.6969	33.0384	21.2237	22.4808	30.0529	30.0529	20.2589	26.145	16.3936	28.5142	22.3458	32.1214	39.9531	21.5289	44.6577	24.1525	56.1549	18.9825	42.9152	42.9152	21.633	21.3808	36.1115	22.0878	26.1502	20.7237	48.2897	18.5374	55.3058	23.694	34.8428	51.2186	32.5391	31.2342	50.1037	37.0324	51.7513	32.6362	29.595	23.7154	54.4322	33.6436	29.5596	50.9405	27.4993	40.4214	24.5548	34.3536
218	22.4458	24.0964	35.207	19.83	20.3978	30.6105	30.6105	17.8881	21.2328	18.8624	27.8961	20.8815	41.5948	37.8102	18.5337	50.7374	18.9944	60.3836	19.2952	42.5075	42.5075	23.9247	19.1288	31.3317	21.0938	21.5836	17.4787	38.9556	18.1412	48.1785	27.5472	34.9207	49.1134	30.408	27.6307	51.5303	35.939	59.3085	31.8167	32.3751	21.002	49.2142	38.1141	30.2773	51.4213	22.1695	42.6096	22.8918	46.5946
221	13.7717	26.1033	32.0215	20.8092	21.0484	30.7185	30.7185	20.5906	18.8476	15.7978	29.4358	23.8574	34.9914	34.2952	18.9882	45.787	15.5175	58.5079	17.3731	38.302	38.302	21.3589	19.4699	26.3216	19.1451	17.341	21.1366	42.3442	18.4774	45.5724	27.8737	36.2654	49.553	38.7642	31.7688	55.6471	39.1047	44.3466	34.4441	33.2351	26.7438	48.7562	53.2561	31.847	50.509	24.1236	48.0866	20.5979	42.403
224	11.8437	28.7855	34.3201	21.3701	20.7172	29.3518	29.3518	20.6367	21.8333	19.4049	28.8459	21.8194	35.289	34.3029	20.7836	44.1175	29.2524	60.4732	15.2189	33.9707	33.9707	20.0883	20.7165	21.912	19.3841	17.8847	20.8988	34.1091	17.9031	48.4441	28.1483	33.9337	51.3863	37.9082	31.5494	54.2311	40.6157	49.3314	36.958	33.9187	28.4642	47.5211	56.2421	27.2859	49.9178	26.1357	43.1806	16.6898	52.1004
227	16.1311	27.8463	33.5467	19.7826	23.3182	29.5419	29.5419	24.6194	30.412	19.4436	27.1387	25.7191	36.2443	34.1678	21.1143	50.1716	21.8049	60.0372	14.1855	32.2876	32.2876	21.3791	22.3304	29.0205	18.4186	17.9886	19.6833	43.599	20.7492	44.262	30.5531	32.8432	56.0866	40.2346	33.5861	53.5599	41.2357	54.8737	33.6477	34.8001	30.0171	39.2233	46.7839	28.2642	51.699	20.0464	48.9385	14.478	54.3252
230	17.6407	26.0714	30.1488	21.0908	26.43	27.6405	27.6405	24.0724	23.9107	21.5983	35.3669	26.5825	32.9129	31.6276	20.436	53.5023	20.8555	62.336	14.8636	30.8298	30.8298	23.1993	23.5333	25.2507	21.6405	22.8565	21.7112	39.407	22.465	42.1379	28.1982	33.3014	57.0965	36.0944	35.0769	44.8519	41.1054	50.219	34.066	31.0707	26.4784	40.3591	50.0772	26.4859	42.8197	21.4099	46.8875	18.7987	52.2783
233	15.6717	27.2286	34.6157	21.4958	19.8469	27.017	27.017	21.3922	22.0715	25.6313	38.3967	23.7512	39.9431	34.3751	19.311	49.8617	16.6669	55.7062	14.6381	27.2455	27.2455	21.1058	21.8563	28.7418	20.0532	18.6772	22.2664	46.1037	22.8656	38.0169	30.6525	34.4412	48.0836	28.2704	37.121	41.4464	38.4742	47.84	38.8665	35.8267	29.3847	39.3877	51.879	26.1428	40.887	24.8965	48.5747	20.0782	56.4358
236	14.7524	28.4583	31.4108	21.2029	26.283	26.5955	26.5955	21.7824	23.6303	24.3009	31.9467	22.3443	39.6414	33.6266	20.3937	59.3244	14.5813	56.5924	17.601	31.1275	31.1275	19.3027	22.511	28.5204	16.8175	21.3003	22.2704	28.0858	19.0859	39.5911	29.1125	31.566	47.4867	37.5626	34.8819	46.3655	34.4653	39.7127	40.7521	36.9852	29.9201	40.3055	42.8888	26.1086	45.5579	25.0219	43.7996	15.0882	48.1637
239	14.4807	29.0013	30.1475	19.4983	21.6011	28.2131	28.2131	21.4977	28.455	21.9062	35.3944	27.7113	34.5205	35.1469	21.5982	59.3022	17.2728	55.2441	15.2359	31.3867	31.3867	18.67	20.7673	21.5427	18.5717	23.428	24.5918	33.6825	18.9356	39.9828	27.1625	33.4375	42.0424	30.2461	34.9093	54.2543	33.2337	42.8921	34.8776	39.0742	28.1497	43.6146	41.6223	30.1999	43.1831	23.9044	35.8597	19.7451	41.0339
242	19.3399	26.3	30.6241	20.2448	23.6539	27.0432	27.0432	20.7936	26.1552	20.0176	32.4618	27.8618	40.8809	31.1773	20.041	53.9931	27.3278	58.7365	15.5614	30.8708	30.8708	21.2514	19.455	26.3382	17.7625	17.3922	25.9504	32.2235	19.7175	47.8049	33.2507	31.6176	39.7891	28.2662	34.1658	54.6383	33.5881	49.1562	37.3376	39.482	30.4197	48.5677	46.8299	28.2249	42.7834	20.1972	38.4628	18.2599	44.9972
245	16.4459	27.0546	30.4837	25.0347	20.679	23.4593	23.4593	25.4129	30.0084	21.6019	33.3842	32.2473	37.5315	37.9104	22.022	55.5469	25.2583	55.7528	16.3416	28.5272	28.5272	19.682	20.0231	24.9543	22.7703	25.0723	28.0487	35.3946	18.1709	45.2714	32.6286	33.9106	31.5263	28.6404	37.2407	61.5297	34.3565	50.3554	43.638	34.93	26.3687	48.6245	54.629	29.3504	39.2739	23.0152	39.9987	16.2313	43.4017
249	11.8544	27.5379	35.1526	18.3807	21.4818	25.9608	25.9608	22.3462	35.5042	19.0813	29.4274	26.6435	40.7638	42.6645	19.124	49.4671	17.9658	54.0649	16.6779	29.7112	29.7112	22.0119	22.2596	26.0988	20.0473	21.8746	23.4527	36.3292	18.1781	52.5963	30.8795	31.7669	36.9139	28.3043	38.6821	61.9024	35.2233	50.6575	38.8668	37.9478	34.6652	48.3415	57.9954	33.987	35.2438	34.9732	43.4936	17.2292	37.9841
251	19.8399	26.8665	37.8616	21.4676	21.4258	27.6867	27.6867	22.6266	30.5219	18.0891	35.924	32.2185	41.5451	39.0889	16.2144	44.47	17.4195	53.5721	18.6621	28.679	28.679	18.4831	27.3302	25.5663	22.487	19.1107	23.2805	36.8602	19.3353	42.6237	33.4379	34.2136	35.7131	27.986	33.6516	56.7034	37.0542	46.2364	36.1183	37.3374	23.6979	44.4511	64.463	38.7523	38.9675	27.009	41.4327	15.9576	42.0806
254	15.18	27.3026	31.7162	23.3247	22.6783	28.7169	28.7169	23.8177	30.4781	18.2008	36.1517	26.552	38.3797	37.8789	20.0054	36.2956	17.1751	53.3033	19.9344	27.1414	27.1414	16.4112	28.5867	24.3339	19.0352	21.2387	25.0264	40.2699	20.9593	39.3445	29.0004	34.3465	35.9721	28.0081	36.0494	58.6361	37.8584	49.9774	33.7353	35.9996	28.3195	51.6019	60.422	34.4433	42.6106	32.6995	42.2274	15.0249	34.0903
257	21.1777	30.8514	29.7223	22.146	25.4364	29.087	29.087	22.3495	30.6173	18.0093	41.3936	23.896	38.4361	33.5434	16.9665	37.1155	18.6918	49.2608	18.5208	28.5574	28.5574	15.3598	26.1417	23.5456	23.0313	21.8604	20.4078	41.1429	21.0972	41.2193	35.0507	35.173	36.2074	26.7457	33.3879	58.1407	35.6432	51.8567	40.6444	38.4934	30.4317	60.9466	50.0655	35.3305	52.232	31.1652	46.2707	16.1194	27.9154
260	20.9303	26.0429	31.9365	20.0996	25.8036	33.4722	33.4722	26.3808	24.9833	19.2552	40.4794	29.4803	39.267	33.8167	17.1944	30.571	19.6859	48.0958	17.9799	27.6786	27.6786	15.4744	23.5328	29.2147	22.34	20.8124	23.0659	37.1221	19.9563	43.4027	39.2293	35.0208	34.4708	30.5214	38.0137	51.0993	39.9472	56.0382	31.5569	32.8381	32.193	56.8456	55.1727	31.417	53.772	30.8362	36.2363	19.2902	28.061
263	19.1086	27.5231	36.9797	17.1552	25.8153	33.6898	33.6898	28.4399	21.8189	21.4098	39.0769	33.99	36.3686	33.6463	18.6171	39.9608	17.4504	45.9383	20.8312	25.0226	25.0226	15.5783	23.4635	28.3592	20.6952	20.6844	25.013	40.2907	18.9917	44.5991	36.3019	34.2029	44.7368	27.3172	37.442	55.6598	41.2052	47.6696	33.1283	31.2065	31.8535	54.0758	50.3966	21.9307	42.6919	26.5093	36.2778	18.1182	32.1578
266	17.4767	26.6555	36.6651	17.636	27.5703	37.374	37.374	25.2308	24.5609	18.5568	31.9612	30.3407	43.6708	35.1721	17.9312	34.653	19.5672	49.4248	19.1072	30.1393	30.1393	16.7826	25.3834	27.2143	21.2701	22.8955	27.7676	40.865	19.3329	46.9702	31.7064	34.2708	55.336	25.1852	34.3291	57.649	42.9887	48.3724	37.3263	32.9382	37.4693	51.9921	58.5786	20.2897	42.2594	25.7853	40.2139	20.1624	36.2984
269	26.4021	29.0803	36.2363	17.3912	23.734	34.7504	34.7504	26.9039	22.7371	17.3155	46.5485	24.2187	37.9269	33.0817	19.5314	30.5619	21.3792	41.7226	18.5405	26.0682	26.0682	17.7082	29.1782	26.662	24.9028	20.1041	29.279	41.4824	20.3334	54.3951	35.7716	35.902	49.96	29.6962	35.876	50.8329	44.949	46.8198	37.9216	32.64	34.8653	61.1336	53.4977	23.9756	40.0418	30.0781	43.6395	19.1845	33.7216
272	20.7775	28.6588	38.4999	17.2223	28.2271	35.6931	35.6931	30.2505	20.1274	22.0634	54.0978	22.9507	37.5698	32.8101	18.5172	46.6427	19.7812	45.0453	19.2418	23.8662	23.8662	20.0444	26.1132	28.429	17.9269	20.3052	28.2381	39.9829	20.5006	55.7714	31.4447	33.8214	50.1532	27.9491	36.4205	52.6474	41.0842	57.0436	36.3938	35.9653	37.821	45.4594	61.0817	28.3292	40.3008	28.6099	40.9259	24.4436	29.5593
275	22.1606	28.2821	38.9377	21.8378	25.7067	30.968	30.968	31.4852	22.5568	21.1822	49.0254	23.6885	42.7081	32.9123	21.979	42.0446	18.5365	40.7726	16.1057	32.095	32.095	19.8758	27.3729	26.8411	18.7969	19.4859	25.3695	36.761	21.1715	50.6849	32.4931	37.2621	42.428	29.5759	35.1353	50.9023	43.2606	57.3704	32.1991	36.7214	36.9406	45.2943	59.3266	26.1904	61.0708	34.5327	35.1147	22.7613	37.9765
278	25.6689	28.712	41.9201	16.5977	28.9426	37.3678	37.3678	28.9916	22.666	24.796	38.3203	23.238	43.3919	34.6197	19.4575	39.409	22.6304	45.9772	15.6401	42.1349	42.1349	21.7904	27.9916	22.6265	16.7806	29.8227	25.9977	40.9174	21.0224	49.9273	31.7378	35.6769	50.5949	26.4027	37.6295	50.5522	43.5431	52.136	31.4792	39.8811	42.6285	47.6213	59.3723	26.4381	54.6966	32.865	37.1578	22.9544	55.0844
281	18.0064	29.7755	40.1393	20.321	24.2511	42.7717	42.7717	34.0179	24.8657	23.4834	40.4912	26.2248	44.7575	31.552	21.5867	39.0043	18.7553	43.7233	17.7565	29.9847	29.9847	17.1012	26.6398	23.7478	16.1593	30.9252	27.4724	39.4738	20.3054	47.8209	29.411	36.6961	46.7021	32.2986	38.6815	51.9815	43.6694	47.4568	34.9704	38.2362	38.3129	49.8188	63.3384	29.709	63.8962	30.5406	37.4514	20.6957	52.5821
284	26.444	29.4172	38.4948	24.9662	24.6116	41.6407	41.6407	31.0913	22.7424	25.6347	40.2839	26.3009	41.1843	30.0165	19.0219	42.6016	22.4614	47.6266	18.1081	35.1871	35.1871	15.9776	21.7299	22.3087	21.2095	24.9005	25.8778	36.3405	21.8781	58.7729	31.2437	36.6948	46.2983	33.5509	39.3809	47.7646	42.5619	46.1519	33.2405	40.6256	40.6194	51.5742	60.4941	26.5001	54.9571	37.5085	44.2579	23.1116	43.1099
287	23.712	32.4275	40.2688	32.4229	28.561	37.4017	37.4017	32.0821	27.2352	23.7346	43.2238	29.6335	39.5457	27.2839	21.6945	36.8544	26.8316	51.6435	17.8166	31.0146	31.0146	18.3203	21.7444	27.3924	25.9884	21.8731	24.8871	32.386	25.417	50.8136	30.7631	38.1546	50.6257	35.198	39.1166	46.2973	51.7467	51.4005	32.394	38.5355	34.1907	51.1356	61.5462	27.8249	51.7739	36.8882	37.0495	19.5803	42.8246
290	25.4858	35.7124	37.6837	43.8939	31.602	37.0603	37.0603	31.3996	31.9818	20.8521	42.0661	27.4101	45.8738	33.1678	20.137	32.4511	22.8542	46.723	16.1842	22.6186	22.6186	18.4025	21.8072	31.8742	24.0213	29.1467	27.3448	36.7185	25.3704	50.3658	31.1475	37.5682	52.6103	35.1779	42.2205	51.5763	40.695	46.1195	30.4347	30.3763	31.651	40.7856	48.9781	22.6214	62.6349	37.3981	35.426	23.1818	38.3009
293	27.3482	35.9315	39.4884	38.3744	26.113	36.2917	36.2917	29.6416	28.4989	18.6425	49.0314	33.1668	35.1372	36.5766	23.425	30.5313	25.7901	50.355	16.1359	30.1311	30.1311	16.9041	18.7496	27.3242	24.8007	30.5628	23.1262	34.4619	25.5328	48.5138	33.1247	35.2288	56.426	31.0814	41.3032	49.5251	44.9955	49.2678	35.6771	36.2993	28.8699	42.4953	47.759	26.4656	51.7659	37.7475	41.1467	22.1996	35.8125
296	21.3131	34.7396	42.0695	32.4172	27.7798	38.351	38.351	31.1946	27.7849	19.5731	51.5814	30.4853	38.0998	33.6936	25.4556	34.7128	19.8849	53.8884	20.9438	32.5596	32.5596	16.3528	19.9657	23.044	28.3831	33.3089	25.3586	39.3642	28.0248	46.1194	33.462	37.3365	61.5243	31.4301	36.5527	38.4382	42.1863	48.6225	35.0706	37.1656	34.6317	54.9688	49.7531	25.8737	57.7572	33.9096	43.2008	18.3157	63.3436
299	22.4103	35.0912	39.2998	32.1789	24.3298	43.051	43.051	30.2777	31.2731	16.8897	57.5542	34.0472	49.1441	31.6389	25.9301	41.1348	27.3141	47.6645	19.7941	28.6857	28.6857	16.868	16.6872	22.702	26.1451	28.8689	26.3757	41.7482	28.9896	46.1021	35.5699	39.9001	47.6662	28.1039	40.0321	42.3195	43.3407	52.8456	38.9253	42.4561	36.4344	69.5888	56.872	24.7609	55.589	42.4584	47.9655	22.4634	68.1415
[truncated: 42 more columns]

## Sheet: Panel E
Panel E
Fold change in track duration (Cav1-mCh was set to 1)
Cav1-mCh	EHD2 siRNA	EHD2 siRNA+LacCer	EHD2 siRNA	EHD2 siRNA+Chol
1	0.805556	0.625	0.539352	0.756944
1	0.784722	0.648148	0.671296	0.696759
1	0.835648	0.539352	0.486111	0.770833
1	0.611111	0.643519	0.8125	0.55787
1	0.662037	0.5625	0.581019	0.560185
1	0.581019	0.578704	0.643519	0.601852
1	0.585648	0.68287	0.75	0.703704
1	0.537037	0.604167	0.606481	0.787037
1	0.618056	0.592593	0.770833	0.777778
1	0.488426	0.625	0.884259	0.796296
1	0.553241	0.780093	0.798611	0.900463
1	0.578704	0.655093	0.474537	0.831019
1	0.840278	0.671296	0.569444	0.789352
1	0.902778	0.793981	0.847222	0.844907
1	0.8125	0.613426	0.837963	0.914352
1	0.736111	0.712963	0.736111	0.611111
1	0.615741	0.696759	0.571759	0.972222
1	0.759259	0.68287	0.599537	0.80787
1	0.717593	0.6875	0.631944	0.761574
1	0.694444	0.703704	0.648148	0.666667
1	0.699074	0.608796	0.842593	0.893519
1	0.712963	0.763889	0.861111	0.856481
1	0.606481	0.710648	0.525463	0.604167
1	0.585648	0.743056	0.564815	0.539352
	0.555556	0.569444
	0.518519	0.895833
	0.564815	0.724537
	0.599537	0.530093
	0.592593	0.571759
	0.625	0.592593
	0.537037	0.784722
	0.608796
	0.645833

## Sheet: Panel F
Panel F
Fold change in track duration (EHD2-BFP was set to 1)
Untreated (Cav1-mCh)	EHD2-BFP	EHD2-BFP+Bodipy-GM1	EHD2-BFP+Bodipy-LacCer	EHD2-BFP+Bodipy-Cer	EHD2-BFP+Bodipy-Chol	EHD2-BFP+Bodipy-SM C12	EHD2-BFP+Bodipy-SM C5	EHD2-BFP+Smase
0.650481	1	0.879469	0.812863	0.77728	1.20781	1.25973	1.04401	0.960518
0.755841	1	1.63415	0.820307	0.80867	0.827574	1.33303	0.947433	0.563236
0.635211	1	1.16322	1.18654	0.976084	1.08032	1.61857	0.819071	1.00378
0.688655	1	1.03843	0.678874	0.804185	1.07249	2.19881	0.933985	1.06429
0.754314	1	0.931465	1.48876	0.757848	0.959538	1.14063	0.986553	1.07624
0.609253	1	0.876422	1.32946	0.766816	1.07249	1.83234	0.842298	0.501748
0.787907	1	1.00406	1.06734	1.08072	0.696728	0.932967	0.893643	0.688042
0.505421	1	0.519046	1.02458	0.908819	0.738106	1.11403	0.641809	0.853394
0.435181	1	1.48907	1.18186	1.15695	0.732515	1.29811	0.537897	0.886008
0.510233	1	1.06362	1.19255	0.845441	0.839876	1.29129	0.795844
0.51862	1	1.44652	1.43381	0.846637	1.12953	1.21493	1.24448
0.487866	1	1.31889	1.14674	1.00568	0.767107	1.07994	0.986188
0.715724	1	0.764387	1.06276	0.813154	1.06279	0.863133	1.24309
0.517222	1	0.812605	0.757368	0.938714	0.870417	1.23675	0.64779
0.468296	1	0.91613	0.858146	0.929148	0.767107	1.4181	0.61326
0.752069	1		1.54222	0.895665	1.08891	0.98858	0.711326
0.564751	1		1.14979	0.985351	1.19935	1.31288	0.977901
0.555394	1		1.08754	0.996114	0.95829	1.51207	1.01934
0.501599	1		0.91141	1.10972	0.938103	1.32015	1.11464
0.625182	1		1.16442	0.705531	0.876354	1.30707	0.946133
0.524862	1		0.989691	1.29148	1.02954	1.24309	1.12293
0.56121	1		1.15045			1.40448
0.619366	1		0.787			1.39139
0.692062	1		1.25808			1.5993
0.425996	1		1.20356			1.04972
0.446351	1		0.894834			1.29107
			0.662889
			1.12019
			1.08329
			0.968635
			0.993674
			0.780179
			1.24671
			0.856616
			1.14128
			0.89088

## Sheet: Panel H
Panel H
Fold change in track duration (Bodipy-LacCer was set to 1)
Bodipy-LacCer	Bodipy-LacCer + EHD2-647
1	2.41256
1	1.1229
1	1.49754
1	1.61996
1	1.51108
1	1.54784
1	1.69585
1	1.93013
