# Supplementary material for: Lipid accumulation controls the balance between surface connection and scission of caveolae
Source: eLife. 2020 May 4;9:e55038. doi: 10.7554/eLife.55038 (PMC7239661; doi:10.7554/eLife.55038)
Supplement: Figure 4—figure supplement 1—source data 1. [file elife-55038-fig4-figsupp1-data1.xlsx]

## Sheet: Panel A
Panel A
Relative intensity (%) vs. Distance (um)
Distance (um)	EHD2-BFP (RI%)	Bodipy-LacCer (RI%)	Cav1-mCh (RI%)		Distance (um)	EHD2-BFP RI(%)	Bodipy-Chol RI(%)	Cav1-mCh RI(%)		Distance (um)	EHD2-BFP RI(%)	Bodipy-SM C12 RI(%)	Cav1-mCh RI(%)		Distance (um)	EHD2-BFP RI(%)	Bodipy-Cer RI(%)	Cav1-mCh RI(%)
0	35.2897	66.0472	31.764		0	58.4535	44.5251	68.0909		0	67.5559	20.3348	66.6515		0	54.1968	62.2406	34.1913
0.16	37.3078	65.8446	31.6141		0.16	68.8682	36.4936	65.1601		0.16	66.9799	18.7734	68.0932		0.16	51.4331	63.2123	35.0758
0.32	36.1513	65.1513	32.676		0.32	67.9268	39.7924	58.7783		0.32	64.3923	18.6522	68.9193		0.32	59.7621	63.6524	36.9871
0.48	35.3616	64.8594	29.9108		0.48	68.5684	42.5256	60.1876		0.48	60.8128	21.38	67.5299		0.48	50.4559	66.0811	35.3636
0.64	35.3298	65.1654	28.7249		0.64	65.5637	45.5547	60.1349		0.64	64.2327	23.7129	68.8882		0.64	47.753	62.2771	34.2552
0.8	34.7671	63.7818	31.6531		0.8	66.9139	41.3248	61.0523		0.8	63.2101	21.5504	70.2145		0.8	50.444	58.8372	34.7109
0.96	33.3329	61.6075	34.1367		0.96	65.2697	38.7436	59.0259		0.96	70.4782	21.2382	70.6784		0.96	50.365	57.3876	33.8995
1.12	33.7834	61.344	32.5237		1.12	64.3594	37.7204	72.2784		1.12	63.6972	21.9779	70.3333		1.12	47.1333	64.2692	41.258
1.28	34.9286	62.3126	29.6989		1.28	60.2037	40.5067	72.3356		1.28	64.411	22.3435	69.5984		1.28	47.6633	63.6805	34.4638
1.44	34.8336	64.6797	34.9763		1.44	65.5432	44.659	60.2266		1.44	69.2091	26.7224	69.7462		1.44	50.3314	63.7707	39.0479
1.6	35.6736	63.6664	33.6614		1.6	68.3667	44.9399	63.7161		1.6	69.3044	28.143	70.1711		1.6	53.4445	65.2657	41.5818
1.76	34.5808	65.389	33.9276		1.76	70.5032	39.7969	67.746		1.76	74.2465	32.7296	73.3681		1.76	54.5831	66.462	39.4695
1.92	35.4944	64.1998	38.9129		1.92	67.4506	39.5722	62.3213		1.92	86.4602	46.7683	83.1003		1.92	56.4841	71.2867	34.8197
2.08	33.53	61.7116	45.7962		2.08	68.6139	41.7285	52.0747		2.08	96.4945	69.1042	96.4817		2.08	50.5442	67.8491	41.6682
2.24	33.7516	65.4696	45.5088		2.24	69.6042	43.853	62.3195		2.24	100.016	66.0499	100		2.24	49.6664	67.7667	42.322
2.4	33.8554	66.8337	41.6716		2.4	74.8616	51.7218	81.67		2.4	98.9843	51.1059	93.8925		2.4	49.5401	68.6978	38.0238
2.56	36.215	66.9677	38.8994		2.56	79.6746	55.7923	72.4812		2.56	90.6019	38.9965	85.1606		2.56	49.4636	69.6619	34.5789
2.72	38.044	68.557	36.2927		2.72	96.3345	65.4094	76.6342		2.72	75.9636	30.1472	77.4118		2.72	55.4979	70.6098	39.8567
2.88	38.3642	64.8191	34.5319		2.88	80.4403	76.6465	82.4991		2.88	69.012	25.3614	70.4703		2.88	51.6914	73.258	40.0338
3.04	39.6382	64.4256	36.5911		3.04	82.2565	85.1556	80.5959		3.04	67.0029	23.2702	72.0647		3.04	56.2145	74.2226	48.0965
3.2	39.1335	63.892	34.6505		3.2	78.5079	69.1194	85.7633		3.2	67.1789	23.6152	69.7242		3.2	65.1581	73.0372	54.405
3.36	39.9277	62.3167	36.6084		3.36	75.3982	62.8464	94.0356		3.36	59.1379	25.3287	70.2189		3.36	61.8568	73.4535	51.7277
3.52	45.3039	66.8689	47.1952		3.52	72.0995	52.8553	72.8936		3.52	59.8434	21.4042	67.575		3.52	51.9482	79.6331	47.5758
3.68	54.8748	70.27	72.0944		3.68	71.5492	50.1843	65.2892		3.68	61.0122	23.4909	67.183		3.68	50.9839	76.7174	43.8991
3.84	69.9618	78.6069	100		3.84	64.7159	45.0444	67.3216		3.84	60.1992	24.2441	68.2164		3.84	46.7664	72.0048	42.2996
4	79.9196	85.9421	98.5178		4	66.0877	42.8156	64.6689		4	61.8403	21.742	69.0821		4	46.6699	66.7306	47.5099
4.16	91.9614	88.1099	89.6969		4.16	66.9491	43.2432	59.9493		4.16	61.461	21.8747	67.7763		4.16	49.2234	64.9693	46.637
4.32	91.4055	84.2801	82.7976		4.32	75.053	48.5573	62.9165		4.32	60.1764	22.3439	66.7547		4.32	59.442	66.4717	41.3734
4.48	74.2623	76.6317	62.421		4.48	66.448	50.4054	66.2334		4.48	60.8517	24.9429	64.9356		4.48	56.5407	68.4263	38.2502
4.64	55.8239	72.4146	47.9285		4.64	67.3833	50.0094	64.0904		4.64	58.4372	25.4695	65.5046		4.64	55.5207	69.4831	39.4864
4.8	45.1219	71.2845	40.4427		4.8	64.7775	53.5042	65.6219		4.8	59.716	26.665	65.0256		4.8	58.6684	65.8235	42.4649
4.96	40.9295	70.5862	37.7669		4.96	70.3996	51.4086	67.4274		4.96	58.5073	22.8822	64.8163		4.96	58.4359	67.1705	42.0792
5.12	39.7216	70.2957	36.4072		5.12	77.332	56.7187	73.0046		5.12	60.1688	25.5754	63.4832		5.12	58.1485	75.4533	51.2222
5.28	39.4686	69.5663	40.7016		5.28	76.4648	65.6235	75.9967		5.28	67.2008	25.6548	60.5351		5.28	77.5034	68.5724	67.1081
5.44	37.2413	68.7633	40.3755		5.44	79.2757	70.1583	82.2842		5.44	58.3936	26.281	61.7349		5.44	76.6241	71.4107	70.7416
5.6	41.1992	72.2657	38.1274		5.6	81.2426	79.2418	81.6051		5.6	60.3377	26.918	63.7883		5.6	72.5949	70.8918	72.0561
5.76	56.4115	73.2299	49.9588		5.76	81.4111	73.1773	91.7927		5.76	58.7746	29.9763	60.787		5.76	71.0312	72.104	72.2324
5.92	71.8293	87.051	64.2057		5.92	81.2138	71.475	100.008		5.92	63.2234	29.7614	61.0999		5.92	65.2683	64.9951	73.819
6.08	77.6293	89.193	75.5351		6.08	85.055	70.3	98.108		6.08	66.3526	31.9872	61.4932		6.08	61.6787	73.0847	64.0839
6.24	72.4333	88.4329	76.7078		6.24	84.9046	67.1092	85.3111		6.24	66.8416	34.1502	60.3556		6.24	67.9841	77.2311	61.306
6.4	64.0559	84.9557	68.6171		6.4	85.3446	60.4878	78.8328		6.4	66.3144	34.8742	59.7573		6.4	69.3019	80.7361	66.0755
6.56	55.9993	78.0384	52.4213		6.56	76.074	56.9823	73.7694		6.56	66.8532	38.9269	60.4116		6.56	79.4628	81.6657	70.2594
6.72	49.0013	73.92	41.5384		6.72	71.6962	52.0299	77.8991		6.72	67.2589	44.4847	59.7694		6.72	96.915	83.6736	81.2643
6.88	44.475	71.1235	35.6549		6.88	70.9988	51.5187	76.1916		6.88	65.8732	52.5593	59.1782		6.88	100	82.6006	100
7.04	40.5635	65.8615	38.1243		7.04	73.5581	50.6071	70.8665		7.04	64.3619	62.0065	58.5929		7.04	86.7956	82.7656	81.0845
7.2	36.9483	58.6846	42.357		7.2	81.6128	50.1749	74.9779		7.2	68.0163	67.4297	63.3753		7.2	68.7073	81.6605	64.1869
7.36	35.4981	63.3801	44.1957		7.36	72.8902	61.803	74.3456		7.36	77.6834	73.6006	70.0775		7.36	58.8061	79.6521	54.2009
7.52	37.3005	65.6153	39.4702		7.52	66.5608	64.6975	83.5958		7.52	85.08	68.7673	80.9702		7.52	60.6403	78.2152	45.7627
7.68	36.0581	64.5566	37.0269		7.68	78.6901	74.1351	64.0678		7.68	92.0205	69.6595	82.042		7.68	66.442	78.2072	60.3681
7.84	35.9822	66.6328	38.81		7.84	81.5844	88.1416	73.0607		7.84	89.6223	74.0832	79.3788		7.84	66.8091	81.5612	69.445
8	42.5933	73.0062	46.9514		8	93.8333	97.9621	72.9422		8	77.5713	66.7097	72.2585		8	74.7106	80.1526	73.1576
8.16	57.3289	80.8695	59.7698		8.16	100	100	73.8604		8.16	70.8	54.9869	63.8169		8.16	85.9716	80.4226	80.8938
8.32	75.7796	86.979	76.0801		8.32	88.7263	85.5071	83.4035		8.32	67.6507	46.6728	60.6354		8.32	91.2399	82.8285	77.0539
8.48	94.2581	92.7283	87.6275		8.48	86.6333	90.3771	84.0098		8.48	62.563	37.9159	58.0284		8.48	97.9122	86.3289	72.2965
8.64	100	99.3662	89.3953		8.64	92.2882	88.7436	73.5693		8.64	59.1148	34.5992	57.0716		8.64	82.7549	88.467	71.7416
8.8	93.187	100	90.8287		8.8	84.49	83.9331	77.4035		8.8	58.0027	31.8176	57.3257		8.8	72.5399	81.4246	87.5848
8.96	83.7215	93.5876	81.6881		8.96	77.414	73.7826	76.7158		8.96	58.9785	35.377	56.8579		8.96	63.7524	84.3216	84.8416
9.12	65.4101	84.3883	58.7229		9.12	77.5484	57.9224	71.1264		9.12	64.698	47.7359	59.8368		9.12	63.3392	80.8979	55.5886
9.28	48.2789	76.3132	40.5597		9.28	79.7064	57.897	67.3858		9.28	72.0546	73.2431	66.3523		9.28	61.4563	82.5387	57.1487
9.44	40.2125	70.7777	32.5968		9.44	69.9152	53.1919	63.8157		9.44	72.2498	96.1096	76.4541		9.44	57.3862	83.4986	53.4561
9.6	33.8199	67.5508	29.3056		9.6	71.1014	45.1305	69.3903		9.6	72.5146	100	82.9104		9.6	62.4063	82.541	45.3221
9.76	33.1993	64.4288	30.3671		9.76	70.4871	49.6953	62.0882		9.76	71.8579	89.5287	74.2258		9.76	62.4297	87.1993	43.8247
9.92	31.7388	63.8337	25.3874		9.92	69.8684	47.7132	51.6399		9.92	61.2716	59.5049	63.5658		9.92	60.2804	81.9531	39.7952
10.08	30.7188	58.8015	25.0152		10.08	71.074	46.9794	61.8639		10.08	57.6844	36.6568	58.223		10.08	66.099	87.423	44.9321
10.24	28.3064	60.3508	26.6894		10.24	73.4624	48.5956	62.3525		10.24	53.9129	34.1161	57.3319		10.24	62.4685	89.9445	41.2966
10.4	29.2	61.557	27.227		10.4	65.7175	52.3608	51.1547		10.4	52.783	34.5202	57.9753		10.4	63.0567	89.5068	45.573
10.56	29.417	61.8162	25.9757		10.56	60.9284	50.1116	52.3624		10.56	51.1628	39.5711	57.8345		10.56	68.0432	92.5366	43.1181
10.72	30.1493	62.2939	26.1655		10.72	67.7265	43.8317	61.3475		10.72	54.2498	43.2444	58.8122		10.72	63.4943	95.7047	45.6212
10.88	28.9945	62.1643	27.6106		10.88	71.1879	45.8811	56.6108		10.88	57.7822	45.5303	58.7172		10.88	65.2467	93.7342	45.963
11.04	29.0136	61.5413	29.0117		11.04	68.3394	46.2248	57.1183		11.04	56.4579	35.2142	58.9091		11.04	69.6114	96.4468	42.9912
11.2	28.2742	59.8498	31.6903		11.2	67.1703	49.9955	61.767		11.2	50.5303	29.4398	56.6122		11.2	71.462	96.853	43.4594
11.36	27.5954	58.8081	30.9592		11.36	68.124	53.2591	72.9724		11.36	47.4668	24.8223	54.8585		11.36	69.9515	95.7953	43.8814
11.52	29.5927	59.733	31.1852		11.52	72.3183	53.6212	89.5057		11.52	50.3961	21.3683	54.4736		11.52	69.8909	100	47.3486
11.68	31.0777	60.632	30.0275		11.68	87.572	65.4168	88.0797		11.68	49.9468	17.9946	53.0225		11.68	65.8965	95.0127	49.2018
11.84	29.7706	60.371	30.103		11.84	69.6681	54.8516	90.6042		11.84	45.8689	18.2283	54.3324		11.84	60.7681	94.0263	45.3665
12	27.9058	60.2714	29.8061		12	71.0159	54.5467	71.2745		12	43.5166	20.9543	56.1062		12	58.2775	95.2504	43.1866
12.16	27.8255	57.613	31.6157		12.16	74.7067	52.7379	63.0732		12.16	45.3812	20.0172	55.0632		12.16	58.5861	92.7613	42.9794
12.32	28.2204	68.2152	32.582		12.32	74.5392	46.4454	54.2596		12.32	51.2312	18.8223	55.9796		12.32	58.7061	91.6592	50.2743
12.48	27.6425	69.8968	30.824		12.48	70.5613	45.5044	57.0872		12.48	50.0292	22.7328	56.276		12.48	57.4972	92.4799	45.7772
12.64	28.0244	65.7709	30.4786		12.64	61.9027	44.9641	59.9997		12.64	46.4391	20.2155	55.474		12.64	62.7326	95.1123	42.0914
12.8										12.8					12.8

## Sheet: Panel B
Panel B
Bodipy-LacCer	Bodipy-Chol	Bodipy-SM C12
97.6937	67.1146	96.6793
90.5516	84.7678	94.1267
57.6724	67.6471	42.504
86.2924	85.9616	71.9467
77.3296	80.9944	75.8454
87.7689	95.6027	95.8215
75.2826	97.9361	65.48
65.7849	93.4654	67.7181
63.7743	47.6961	83.3849
81.8878	74.6977	83.4532
54.4973	75.8394	84.82
90.6232	76.1528	64.6763
86.618	83.291	77.3158
76.2661	83.6098	37.0515
49.1747	78.7533
73.3898	73.4848
92.9847
85.9784
97.0563
77.3009
88.3629
83.6923
92.3692
78.6999
