# Supplementary material for: Lipid accumulation controls the balance between surface connection and scission of caveolae
Source: eLife. 2020 May 4;9:e55038. doi: 10.7554/eLife.55038 (PMC7239661; doi:10.7554/eLife.55038)
Supplement: Figure 4—figure supplement 2—source data 1. [file elife-55038-fig4-figsupp2-data1.xlsx]

## Sheet: Panel A
Panel A
Distance (um)	Bodipy-LacCer (RI%)	Cav1-mCh (RI%)
0	64.8713	32.1686
0.16	67.1451	32.507
0.32	64.2622	31.1889
0.48	65.1668	33.1172
0.64	66.0104	35.1332
0.8	64.6584	34.9034
0.96	63.3253	35.1137
1.12	67.1963	34.0597
1.28	69.9214	35.4782
1.44	67.7969	34.5454
1.6	65.9375	31.4167
1.76	66.3712	31.3647
1.92	66.1734	33.8644
2.08	67.4693	33.6017
2.24	68.21	31.8223
2.4	67.9202	33.6888
2.56	69.6295	31.7513
2.72	71.3829	33.7884
2.88	70.1208	35.2523
3.04	72.8181	39.8995
3.2	81.8309	53.2516
3.36	85.043	74.188
3.52	91.7541	83.7351
3.68	84.2987	69.3728
3.84	77.2362	55.7428
4	68.2152	44.1637
4.16	67.9408	38.2419
4.32	69.3417	37.9973
4.48	71.0476	40.3826
4.64	71.8785	44.86
4.8	71.7476	46.4058
4.96	73.3246	47.8264
5.12	74.4973	44.7458
5.28	74.9681	39.4175
5.44	70.2873	36.6016
5.6	69.8845	37.2672
5.76	70.013	38.1019
5.92	73.6705	36.3989
6.08	74.5125	35.9966
6.24	70.775	34.9991
6.4	70.3589	36.9783
6.56	71.0746	38.0733
6.72	74.5742	37.3931
6.88	75.6715	40.293
7.04	80.8326	46.5974
7.2	91.1796	53.9254
7.36	100	54.3635
7.52	97.1731	59.8723
7.68	95.0839	74.3135
7.84	97.4615	88.347
8	95.8623	86.6167
8.16	89.9238	76.1863
8.32	87.2956	70.7841
8.48	89.6153	69.397
8.64	89.8005	66.4805
8.8	90.5413	50.6705
8.96	91.8674	40.436
9.12	87.5996	35.0428
9.28	83.4155	32.2249
9.44	81.1537	32.3516
9.6	82.0304	32.2982
9.76	82.7703	33.0227
9.92	83.7745	34.7933
10.08	86.4085	40.6736
10.24	87.7438	48.1221
10.4	83.7636	55.8572
10.56	81.6389	70.0979
10.72	79.1443	95.7356
10.88	78.7097	100
11.04	79.5307	77.0148
11.2	77.3704	44.1167
11.36	73.2784	31.6966
11.52	68.1236	29.7443
11.68	67.4212	28.93
11.84	67.7356	25.9328
12	66.9071	27.6524
12.16	72.3308	27.1732
12.32	69.4421	28.1401
12.48	75.4891	29.1717
12.64	76.1212	27.8444
12.8

## Sheet: Panel B
Panel B
Distance (um)	Bodipy-Chol RI(%)	Cav1-mCh RI(%)
0	55.2129	21.5542
0.16	61.4855	23.1112
0.32	64.5959	31.3881
0.48	60.4919	31.649
0.64	60.1425	31.999
0.8	64.2646	48.9853
0.96	77.352	46.8396
1.12	70.3384	41.8565
1.28	56.5733	30.457
1.44	61.1724	26.7696
1.6	65.6733	26.6928
1.76	76.4909	24.6445
1.92	65.0108	23.8474
2.08	63.5386	30.6564
2.24	63.2001	26.9227
2.4	68.9766	30.0938
2.56	59.4766	25.4827
2.72	64.4422	22.3823
2.88	60.4713	19.5554
3.04	56.2323	19.57
3.2	62.4577	17.5047
3.36	58.6748	17.0565
3.52	59.7204	22.416
3.68	58.5959	23.8001
3.84	68.1233	21.8131
4	59.769	24.8136
4.16	59.5902	24.537
4.32	67.1663	27.6103
4.48	60.4466	21.8158
4.64	59.9362	19.2481
4.8	65.5864	20.5205
4.96	61.7144	22.1401
5.12	63.8802	22.9915
5.28	62.6865	21.8642
5.44	61.4743	23.1255
5.6	68.9955	25.0526
5.76	58.3479	26.2996
5.92	59.1371	25.7318
6.08	64.1624	25.0199
6.24	64.6373	28.4098
6.4	66.784	24.3895
6.56	71.0237	22.2247
6.72	66.819	28.2442
6.88	68.0752	27.9641
7.04	75.8967	33.9766
7.2	71.2865	36.0663
7.36	71.9735	33.3886
7.52	74.5238	35.7354
7.68	77.3677	33.9784
7.84	77.0269	40.9822
8	83.0509	43.671
8.16	90.8623	57.4476
8.32	98.0241	74.755
8.48	100	82.4713
8.64	97.0048	78.6048
8.8	83.1917	78.8807
8.96	96.2301	89.7441
9.12	80.0424	100
9.28	97.9527	85.3901
9.44	84.4977	73.8681
9.6	81.1767	55.1554
9.76	75.6887	35.0726
9.92	66.3645	32.3671
10.08	63.3908	27.222
10.24	64.3098	29.2726
10.4	70.4015	30.7232
10.56	73.6986	28.1655
10.72	80.7098	29.7855
10.88	73.1367	37.2663
11.04	66.4056	38.8612
11.2	74.9218	30.0569
11.36	78.1075	28.7654
11.52	74.2455	27.7567
11.68	82.58	29.3652
11.84	70.2792	28.9519
12	67.9237	25.4322
12.16	71.3724	23.6745
12.32	61.1543	21.3764
12.48	69.252	18.7478
12.64	65.6621	16.5799

## Sheet: Panel C
Panel C
Distance (um)	Bodipy-SM C12 RI(%)	Cav1-mCh RI(%)
0	50.3549	42.3589
0.16	51.734	45.4333
0.32	56.4518	52.1147
0.48	55.5545	54.0477
0.64	49.8137	44.7191
0.8	47.3397	41.2609
0.96	45.6988	37.074
1.12	45.2133	33.5567
1.28	44.2824	35.7383
1.44	45.3023	36.5698
1.6	47.5266	37.1062
1.76	50.7679	42.0004
1.92	52.2092	49.8428
2.08	52.5281	52.286
2.24	51.6307	54.7011
2.4	50.4566	59.6392
2.56	53.524	78.5149
2.72	58.9243	93.0938
2.88	59.0534	98.651
3.04	56.4706	77.3153
3.2	53.0081	55.3735
3.36	47.3928	41.7259
3.52	46.2795	36.1269
3.68	46.3523	33.9456
3.84	45.1791	32.1834
4	47.9417	30.058
4.16	47.0364	32.3766
4.32	47.8765	33.3965
4.48	51.2913	32.6502
4.64	52.3767	39.0113
4.8	51.7411	40.4461
4.96	51.1938	37.5358
5.12	53.0183	39.2517
5.28	55.2918	47.4331
5.44	56.9073	54.1945
5.6	59.8159	64.4754
5.76	65.3888	78.8158
5.92	64.4761	100
6.08	62.7214	89.4055
6.24	61.3747	81.1578
6.4	60.1142	72.4817
6.56	62.3695	72.9399
6.72	66.3877	77.2459
6.88	67.4343	78.3481
7.04	67.1714	77.7768
7.2	66.6602	80.5737
7.36	64.6806	73.4533
7.52	63.0841	68.1076
7.68	63.0797	65.2863
7.84	67.2343	74.6736
8	73.893	79.6274
8.16	76.9217	88.1157
8.32	80.7494	97.0884
8.48	81.5977	92.8997
8.64	71.959	74.0329
8.8	65.0824	62.2531
8.96	60.3298	51.0735
9.12	58.1095	43.3912
9.28	57.753	40.9327
9.44	55.9087	40.113
9.6	57.9376	40.7416
9.76	58.6792	49.3033
9.92	58.1934	59.8412
10.08	65.1878	63.4934
10.24	74.6764	77.1166
10.4	88.0067	94.0047
10.56	100	92.351
10.72	99.9458	90.0027
10.88	94.3908	95.4809
11.04	86.674	86.3839
11.2	76.4604	73.5811
11.36	65.8884	56.2029
11.52	60.8229	46.4402
11.68	59.7927	42.3052
11.84	60.1459	40.6226
12	62.6996	40.264
12.16	68.1713	41.2395
12.32	73.5572	47.4933
12.48	73.2755	47.5913
12.64	65.3612	42.9502
12.8

## Sheet: Panel D
Panel D
Distance (um)	Bodipy-Cer RI(%)	Cav1-mCh RI(%)
0	91.6762	35.3211
0.16	89.6328	30.1708
0.32	87.5968	29.7947
0.48	89.2372	29.5852
0.64	89.1119	28.7315
0.8	86.0004	28.5577
0.96	86.1747	28.8505
1.12	87.5698	30.0355
1.28	85.1637	28.4817
1.44	82.9659	30.7954
1.6	78.8859	23.67
1.76	87.09	28.3269
1.92	87.9019	28.6555
2.08	84.994	30.2194
2.24	86.6125	29.0321
2.4	84.9699	34.1321
2.56	83.6568	38.1472
2.72	86.979	52.2394
2.88	89.2968	84.2595
3.04	89.3282	100
3.2	88.4422	78.0124
3.36	87.1261	54.7922
3.52	89.9577	42.0459
3.68	91.5687	33.4767
3.84	90.7114	32.8912
4	93.4724	32.4945
4.16	89.6041	35.7776
4.32	90.0909	33.8019
4.48	90.0558	30.34
4.64	90.3863	28.8343
4.8	86.0148	28.5873
4.96	90.05	31.1927
5.12	91.2773	31.7693
5.28	92.3366	33.9343
5.44	92.9503	45.7855
5.6	92.4775	61.5506
5.76	91.2683	72.1631
5.92	91.4451	63.6151
6.08	92.2439	42.6684
6.24	93.0467	34.4282
6.4	94.2473	32.0581
6.56	93.8773	37.7231
6.72	98.5382	36.9721
6.88	95.8881	37.9035
7.04	90.196	34.1623
7.2	94.0991	31.0966
7.36	97.1008	37.3711
7.52	90.1115	36.8068
7.68	89.8181	37.1023
7.84	89.3647	40.7491
8	89.9886	46.5186
8.16	94.4621	55.4146
8.32	95.9353	52.9283
8.48	89.9048	45.438
8.64	89.4077	42.7868
8.8	93.114	48.3473
8.96	96.5752	47.6897
9.12	96.1108	40.9006
9.28	95.6327	36.9733
9.44	96.462	36.5872
9.6	94.563	39.2344
9.76	96.2046	36.1156
9.92	99.618	35.2049
10.08	96.3531	33.9656
10.24	100	34.9361
10.4	92.3144	31.5441
10.56	92.7521	28.9321
10.72	96.2166	25.026
10.88	97.1311	29.7115
11.04	92.0975	34.435
11.2	87.8533	41.7046
11.36	92.0599	44.7809
11.52	92.8212	42.0851
11.68	91.9612	37.6672
11.84	91.5287	34.8697
12	90.1584	39.5054
12.16	88.9068	49.971
12.32	90.0727	66.183
12.48	87.2873	78.0018
12.64	88.6129	65.7064
