# Supplementary material for: Lipid accumulation controls the balance between surface connection and scission of caveolae
Source: eLife. 2020 May 4;9:e55038. doi: 10.7554/eLife.55038 (PMC7239661; doi:10.7554/eLife.55038)
Supplement: Figure 4—figure supplement 3—source data 1. [file elife-55038-fig4-figsupp3-data1.xlsx]

## Sheet: Panel C
Panel C
	FI Bodipy-SM C12 (%)
Time (s)	in caveolae
0	99.9244
2	105.108
5	94.9674
8	13.4739
11	13.8947
14	15.5708
17	15.5005
20	15.6268
23	16.1574
26	16.2751
29	15.7958
32	17.8928
35	15.961
38	20.3373
41	19.758
44	18.6726
47	19.0856
50	17.8956
53	17.6932
56	19.7391
59	19.7231
62	24.45
65	22.5296
68	22.7568
71	21.8472
74	22.1348
77	23.3093
80	22.2166
83	23.6996
87	20.8748
89	21.7199
92	24.7852
95	24.5634
98	25.6857
101	25.5382
104	26.5618
107	27.4395
110	26.9041
113	28.8495
116	30.0994
119	29.0378
122	26.948
125	28.6563
128	28.5813
131	28.3417
134	28.9196
137	27.388
140	28.3267
143	27.9767
146	26.4314
149	28.4564
152	28.7364
155	30.3303
158	26.5178
161	26.9987
164	28.6992
168	28.0222
170	27.7671
173	29.8109
176	30.9633
179	30.1218
182	34.4834
185	31.8672
188	31.8715
191	30.8373
194	28.7165
197	32.8449
200	31.5826
203	28.5887
206	29.5815
209	28.2627
212	32.0664
215	31.4572
218	30.4469
221	29.6269
224	34.786
227	34.3625
230	35.5548
233	32.3242
236	33.1817
239	27.6202
242	31.5386
245	29.1495
249	32.7549
251	35.2263
254	33.0221
257	39.4612
260	36.9296
263	34.2868
266	32.6851
269	32.9245
272	33.5585
275	34.0324
278	33.7935
281	37.3048
284	39.6351
287	41.3682
290	33.67
293	34.8763
296	35.3822
299	37.241
