# Supplementary material for: Lipid accumulation controls the balance between surface connection and scission of caveolae
Source: eLife. 2020 May 4;9:e55038. doi: 10.7554/eLife.55038 (PMC7239661; doi:10.7554/eLife.55038)
Supplement: Figure 4—source data 1. [file elife-55038-fig4-data1.xlsx]

## Sheet: Panel F
Panel F
	FI Bodipy-LacCer (%)	FI Bodipy-LacCer (%)				FI Bodipy-Chol (%)	FI Bodipy-Chol (%)
Time (s)	in caveolae	in bulk PM			Time (s)	in caveolae	in bulk PM
0	100.388	100.554			0	101.365	96.3215
2	100.668	99.1076			2	98.8619	100.729
5	98.9436	100.338			5	99.7732	102.949
8	11.0758	4.11679			8	8.11116	12.0234
11	19.377	10.8852			11	15.2979	17.3801
14	28.6223	20.097			14	24.3199	30.6814
17	33.3768	25.8247			17	30.8639	39.6056
20	37.902	31.5597			20	32.6502	39.7388
23	41.9175	36.9466			23	38.9065	49.1163
26	46.4802	41.3983			26	39.6983	54.455
29	47.8592	45.7438			29	45.1297	52.7604
32	51.0379	49.2387			32	45.0181	60.4745
35	52.6414	51.9331			35	47.1946	60.8505
38	56.2743	54.662			38	50.2522	68.7122
41	57.1279	58.0862			41	51.0466	79.6355
44	59.2666	59.8567			44	47.2593	74.9817
47	61.2848	63.2209			47	50.4448	76.3787
50	63.6743	66.158			50	48.6401	85.1859
53	65.566	67.6567			53	49.7062	84.8365
56	66.9644	69.7225			56	50.4936	79.5731
59	68.2258	72.5641			59	50.0165	75.7696
62	70.4693	74.7772			62	55.2985	85.5509
65	72.0084	75.4247			65	58.2127	84.1048
68	73.5713	78.2291			68	56.7283	94.2195
71	75.5715	79.1535			71	56.2452	95.5529
74	76.7674	81.0987			74	55.7975	96.0219
77	78.4792	84.1779			77	54.9919	95.2701
80	79.6505	86.0739			80	56.3154	97.5304
83	80.0764	87.2293			83	59.941	102.949
87	81.3989	87.0427			87	57.0291	84.5294
89	81.8528	89.6573			89	59.5952	95.7659
92	83.1105	89.3211			92	57.512	89.976
95	85.0435	89.7274			95	59.0308	96.1218
98	84.7721	92.2258			98	56.0334	92.8919
101	85.2731	92.2456			101	56.6294	85.8166
104	85.9639	92.8091			104	54.8681	96.525
107	87.9141	94.6388			107	55.1671	83.7229
110	85.6206	92.8664			110	53.0919	90.7578
113	88.5717	96.5418			113	57.956	96.3262
116	87.8981	94.5964			116	56.0699	93.7845
119	86.6757	95.6962			119	59.1459	112.955
122	87.5614	94.6892			122	56.5958	89.2578
125	88.2128	92.5504			125	56.7771	91.6893
128	88.7536	94.7125			128	56.7406	87.1964
131	89.7156	94.7846			131	56.6321	85.0325
134	88.8739	94.735			134	62.0527	82.9267
137	89.078	95.3435			137	52.1842	91.3084
140	89.2515	97.0774			140	47.8724	94.2306
143	89.9274	97.889			143	53.6713	95.6705
146	89.1828	95.6925			146	57.2772	92.0455
149	90.3761	96.3875			149	55.7001	105.14
152	87.7288	95.4846			152	56.081	107.297
155	89.9716	96.4575			155	58.04	98.5884
158	89.1891	97.8106			158	55.2869	107.32
161	89.106	98.4289			161	56.8956	97.0211
164	90.1742	95.6179			164	57.2787	102.186
168	91.3845	95.5078			168	51.9948	106.458
170	92.753	96.2428			170	50.0033	111.975
173	92.5992	97.8628			173	48.143	108.175
176	92.9419	97.6483			176	55.3729	107.085
179	91.7907	97.5043			179	49.8217	112.822
182	92.648	96.7582			182	52.3429	101.09
185	92.4447	97.2093			185	47.3635	108.904
188	92.6102	98.1255			188	45.5502	94.7149
191	91.638	98.7518			191	50.1959	110.109
194	90.8302	96.9298			194	45.0984	110.482
197	91.1704	96.5162			197	50.6311	116.495
200	92.0125	96.3285			200	51.4632	106.108
203	92.5463	96.8145			203	52.9109	168.816
206	93.5149	97.6516			206	51.4458	97.3094
209	94.1746	98.6457			209	49.2371	116.454
212	94.2984	97.7735			212	49.3844	141.483
215	93.097	96.8898			215	48.836	111.637
218	92.6109	97.785			218	50.0835	125.236
221	94.158	97.1871			221	50.5846	103.988
224	93.9654	97.308			224	49.8608	130.759
227	94.5772	96.6102			227	45.1743	132.286
230	93.1415	96.7642			230	47.7522	110.991
233	94.3624	98.0278			233	50.7923	105.36
236	96.6411	98.5256			236	48.6007	104.034
239	94.2721	96.2457			239	50.7293	113.418
242	94.3903	97.1409			242	52.5885	124.858
245	94.2018	98.3057			245	51.6995	96.2776
249	93.1892	98.3119			249	52.7718	93.3876
251	95.4627	97.471			251	50.863	104.847
254	93.4491	96.4723			254	47.3509	101.552
257	94.4954	99.6139			257	54.4359	100.979
260	96.5755	97.3477			260	55.5583	112.186
263	94.0262	97.2676			263	56.4018	122.941
266	93.7101	96.6465			266	52.5237	117.64
269	96.3462	98.5215			269	52.0446	104.522
272	96.644	98.2287			272	51.4243	113.914
275	97.3883	96.338			275	51.9915	112.835
278	96.7541	97.9175			278	51.3998	99.5118
281	97.1532	97.7055			281	54.8623	101.139
284	95.631	96.5671			284	52.3301	89.3978
287	95.958	97.1084			287	50.7375	97.7802
290	97.1948	96.6477			290	47.9385	95.076
293	98.0789	99.4502			293	54.2541	103.606
296	97.2393	100.036			296	51.6319	108.288
299	97.5688	98.199			299	48.3097	103.958
