# Supplementary material for: Lipid accumulation controls the balance between surface connection and scission of caveolae
Source: eLife. 2020 May 4;9:e55038. doi: 10.7554/eLife.55038 (PMC7239661; doi:10.7554/eLife.55038)
Supplement: Figure 5—figure supplement 2—source data 1. [file elife-55038-fig5-figsupp2-data1.xlsx]

## Sheet: Panel C
Panel C
	Total Bodipy FI (a.u.)
Time (min)	HeLa cells	HeLa cells	3T3_L1 adipocytes	3T3_L1 adipocytes	3T3_L1 adipocytes	3T3_L1 adipocytes	3T3_L1 adipocytes	3T3_L1 adipocytes
0	185.44	87.5601	101.045	31.6363	22.3241	3.09361	27.68	-5.76617
0.5	192.38	21.63	121.923	46.9908	43.524	-4.13725	21.2	-21.3417
2	746.28	906.01	770.584	1002.76	1184.32	284.73	547.31	-171.701
2.5	2407.72	1241.88	751.22	1354.15	1433.8	947.066	1366.4	446.596
3	3403.41	1681.3	628.003	1192.21	2092.82	1173.87	2468.87	340.762
3.5	3843.94	2321.81	618.273	2366.37	2775.35	2096.02	3854.49	432.594
4	4217.33	2513.74	665.364	2562.73	2772.85	1808.1	5127	1318.6
4.5	4231.61	2498.35	1335.09	2695.99	2452.33	1672.96	5210.32	2031.63
5	4391.99	2391.67	1483.9	3103.25	3637.4	1637.57	4740.87	1181.35
5.5	4522.88	2378.19	2899.12	3364.85	4499.12	1653.99	4570.05	1262.24
6	4481.76	2403.44	2818.2	4055.97	4321.49	1621.43	4890.87	1910.38
6.5	4157.95	2482.09	2545.95	4402.42	4148.51	1513.28	5024.44	1679.24
7	4072.06	2373.47	2123.54	4921.85	4250.33	1313.53	6213.91	1912.1
7.5	3836.3	2440.3	2077.81	4699.48	4593.4
8	3600	2519.54	2084.89	4661.36	6623.28	1237.42	5192.31	2403.5
8.5	3528.48	1645.32	2087	5246.16	4725.18	1746.12	4908.19	2520.58
9	3578.67	1812	2188.95	5187.85	4467.63	1905.58	4424.75	2254.12
9.5	3654.89	1678.87	2662.19	5012.38	4313.86	1803.58	4525.89	2387.5
10	3707.06	1551.08	2997.64	4764.86	4485.55	4229.21	4629.25	2572.07
10.5	3637.17	1372.5	2336.08	4576.26	4485.77	5060.56	4348.46	2252.8
11	4056.22	1337.91	2038.03	4171.08	4442.78	4488.53	4618.3	1918.44
11.5	3781	1210.92	2047.11	3900.6	4163.96	4253.51	5144.75	2141.2
12	3813.4	1169.25	1941.42	3892.06	4115.44	4586.58	4823.3	1773.14
12.5	3604.95	1195.92	2041.76	3724.28	4282.77	5164.02	4853.09	1813.3
13	3737.98	967.31	2013.11	3979.32	4071.9	4174.17	4718.08	1727
13.5	3474.79	1110.14	1813.04	4252.34	4007.04	4097.82	4214.72	1491.92
14	3391.42	1164.61	1639.42	4553.81	3819.05	4072.62	5077.8	1620.99
14.5	3351.05	1137.37	1612.39	3994.13	3454.49	3634.94	4459.11	1788.65
15	3286.13	1401.41	1487.86	4218.79	3571.62	3401.99	4262.19	1922.08
