# Supplementary material for: Lipid accumulation controls the balance between surface connection and scission of caveolae
Source: eLife. 2020 May 4;9:e55038. doi: 10.7554/eLife.55038 (PMC7239661; doi:10.7554/eLife.55038)
Supplement: Figure 5—source data 1. [file elife-55038-fig5-data1.xlsx]

## Sheet: Panel D
Panel D			Panel D'
Control	Chol		Control	Chol
51.6255	43.9872		81.7099	63.5924
62.8963	39.9252		89.9747	63.712
68.11	40.1012		94.2987	67.0701
49.2093	47.0395		103.804	68.5396
51.2195	36.278		79.0218	68.8185
41.1134	32.9351		91.6876	59.1424
37.7713	42.7522		80.6542	64.2903
38.3341	40.9137		89.9832	58.3769
40.0233	41.0682		82.1599	48.3541
33.7304	47.5043		73.15	74.9925
52.5811	47.0465		76.4919	84.8537
39.3608	33.8292		73.5784	56.3948
40.3512	41.9548		82.8656	70.3257
46.8805	43.5255		105.318	68.5089
37.8284	27.9725		104.143	73.1741
75.2221	49.7309		82.422	66.1919
34.7295	35.7548		89.595	55.6181
46.8543	36.5664		79.5369	63.7924
35.3348	42.5272		86.4719	81.368
57.8178	46.4828		108.509	74.6144
44.0895	40.1749		86.9958	69.0192
80.9898	45.6994		83.2964	66.1381
58.6136	26.8492		103.47	61.1494
51.7651	38.6454		80.9346	66.1781
42.4768	44.9402		81.9685	94.8802
41.0927	39.3925		71.3345	70.7615
57.7996	38.1379		85.5992	69.1953
64.5952	37.9639		77.4901	74.7553
46.8805	53.1557			77.1321
37.8284	49.5682			113.809
75.2221	43.1341			82.8245
34.7295	46.587			91.5583
46.8543	40.035			77.3172
	40.8959			71.014
	36.2738			74.3808
	41.3998			82.4921
	33.4043			72.7187
	42.3465			69.1925
	43.524			97.5277
	31.8955			80.4057
	49.4261			69.4596
	36.0618			60.4377
	40.2048			72.6485
	51.8063			81.0274
	37.4377			79.5931
	51.0251			74.12
	35.7373			88.5179
	39.7035			84.0513
	45.3361			76.9688

## Sheet: Panel E
Panel E			Panel E'
Control	Chol		Control	Chol
0.00446153	0.00634879		69.7938	84.2963
0.0038309	0.00655851		67.2805	81.2931
0.00395753	0.00462223		68.6105	70.6441
0.00574193	0.00757239		78.9235	80.5331
0.00374928	0.00683112		63.998	82.7625
0.00396931	0.00489022		65.3161	69.4139
0.00453073	0.00565526		71.8532	80.4408
0.00533869	0.00638139		71.7037	80.3293
0.00469838	0.0167647		75.9679	109.544
0.0048736	0.00862709		68.3654	69.4416
0.0051	0.00586		71.6797	80.8139
0.00415526	0.00461613		68.2635	66.2263
0.00254482	0.00466767		53.5806	67.0928
0.0049548	0.00849457		68.4522	95.8598
0.00272487	0.00474781		52.0733	69.4597
0.00444343	0.00637508		70.9292	85.2044
0.00419501	0.00587171		70.1492	79.4827
0.00607028	0.0060179		80.9303	82.89
0.0058492	0.00465841		84.6293	67.3538
0.00321163	0.00427536		59.1181	72.0336
0.00716579	0.00326295		81.8999	55.4722
0.00272487	0.00394301		52.0733	68.3992
0.00444343	0.00632901		70.9292	84.1639
0.00322488	0.005967		57.5406	81.3404
0.00607028	0.0052739		80.9303	77.6005
0.00503284	0.00408058		73.4549	60.3302
0.00321163	0.00621101		59.1181	77.1638
0.005024	0.00905473		76.8541	89.9762
0.00447982	0.00347036		68.4898	59.4735
0.00572825	0.00572278		82.6275	84.485
0.00411213	0.00511487		65.5357	78.0085
0.00368281	0.00549918		60.1669	79.6664
0.00266219	0.00534563		51.7023	79.4158
0.00501664	0.00487276		73.082	68.6634
0.00424255	0.0041908		65.5626	68.4927
0.00610394	0.004959		77.4116	66.44
0.0051784	0.00500254		69.9868	67.27
0.00594554	0.00408521		82.3089	65.3607
0.00569796	0.00364263		85.5065	62.9166
0.00548782	0.0053166		79.9922	69.8054
0.0074527	0.00582901		85.6139	81.5846
0.00549981	0.00526969		70.594	77.3032
0.00494975	0.006223		67.8989	83.4637
0.004337	0.00701454		61.3192	88.4771
0.004715	0.00493797		68.1845	79.2074
0.00507554	0.00436897		76.2052	65.5054
0.00575497	0.00416114		70.0949	62.6908
0.00640432	0.00513885		85.0068	69.8836
0.00573036	0.00434562		78.511	57.6477
0.00520364	0.00376085		72.2611	53.4664
0.00450885	0.00364347		68.8737	56.6247
0.0052354	0.00406291		72.1009	61.8187
0.00641694	0.00348592		78.4949	55.2467
0.00999983	0.00477705		99.9543	71.6853
0.00755409	0.00406565		87.2755	64.7444
0.00872827	0.00497941		90.4787	70.6822
0.00719881	0.00414116		86.1831	62.7619
0.00430229	0.00534226		64.6368	71.448
0.00573309	0.00517272		69.5792	78.6682
0.00414116	0.00543629		65.0455	78.6783
0.00639927	0.00499771		69.91	76.8849
0.0101122	0.00434268		87.7213	63.0249
0.00580882	0.0068347		74.4213	84.3511
0.00592872	0.00455345		73.8629	60.3474
0.00814749	0.00429661		90.2889	62.4179
0.00482943	0.00376232		72.0608	58.0779
0.00577874	0.00457722		83.0221	74.312
0.00617441	0.00299686		75.9038	56.1855
0.00528505	0.00385572		68.5402	68.5423
0.00614285	0.00490158		73.8023	71.4128
0.00430881	0.00491693		68.5808	70.6887
0.00340515	0.00441041		60.1771	59.5222
0.007975	0.0046256		95.2274	62.9533
0.00439779	0.00318554		73.5224	49.9313
0.00747479	0.0072331		77.5086	84.478
0.00712329	0.00421079		84.1056	66.1861
0.00521542	0.00430629		64.9827	59.9703
0.00567041	0.00353073		85.1703	58.1743
0.00611593	0.00416556		76.6354	61.118
0.00482522	0.0058999		75.9255	72.3027
0.00666852	0.00541483		85.7467	63.5215
0.00644029	0.0059222		78.7439	73.1805
0.00553831	0.00493755		80.9956	66.5814
0.00507785	0.00440473		78.6127	65.9834
0.01004	0.0069222		92.1455	81.0678
0.00914665	0.0051052		92.3972	69.1023
0.00420385	0.00526843		61.5635	61.2123
0.00586982	0.00730399		75.1965	79.8528
0.0124464	0.00604062		100.138	76.8616
0.00442366	0.00765043		74.4178	84.6623
0.00872301	0.00566115		93.2323	73.7178
0.00616073	0.0049123		87.6499	66.836
0.0082087	0.0059222		90.5447	73.1805
0.0057434	0.00493755		81.8724	66.5814
0.0102413	0.00440473		100.139	65.9834
0.0103023	0.0069222		109.252	81.0678
0.0043513	0.0051052		66.8299	69.1023
0.00485299	0.00526843		68.7698	61.2123
0.00803453	0.00730399		100.067	79.8528
0.00735321	0.00604062		93.3403	76.8616
0.00788624	0.00765043		95.4025	84.6623
0.00857345	0.00566115		96.9974	73.7178
0.0119546	0.0049123		121.076	66.836
0.00621774	0.00695586		78.5834	84.1468
0.00617188	0.00531534		82.0794	73.2186
0.011722	0.00556376		119.428	75.2796
0.00733575	0.00467545		93.9019	68.9109
0.00633385	0.00416178		80.3236	66.697
0.0040404	0.00384225		59.035	65.0896
0.0107836	0.00269458		102.268	56.9423
0.00625097	0.00268259		77.1285	49.8591
0.00722889	0.00474276		92.0521	69.0805
0.00499392	0.00320489		78.2047	55.2364
0.0102251	0.00292597		106.77	56.8435
0.00925519	0.00352841		104.208	61.0137
0.00352042	0.00337338		62.9896	56.0896
0.00620575	0.00362686		86.7919	64.242
0.00670764	0.00490873		84.0302	72.9293
0.00585005	0.00447457		74.9024	67.3641
0.0049895	0.00400296		69.6902	65.4004
0.00475055	0.00318239		76.546	57.0686
0.00442556	0.00377705		70.7044	62.5166
0.00565463	0.00514348		79.4196	73.8249
0.00524256	0.00334961		69.7859	59.5753
	0.0028067			50.4094
	0.00433805			68.6152
	0.00303998			56.6469
	0.0032802			57.0081
	0.00364915			58.6955
	0.00263316			47.1283
	0.00537318			80.1244
	0.00692346			83.8385
	0.00552526			77.9076
	0.00484226			72.2841
	0.00357658			57.0713
	0.00379829			65.0558
	0.00308899			55.5644
	0.00426106			70.7079
	0.00536519			79.5286
	0.00464642			73.558
	0.00491399			75.0254
	0.00451327			73.2281
	0.00391819			65.0625
