# Supplementary material for: Lipid accumulation controls the balance between surface connection and scission of caveolae
Source: eLife. 2020 May 4;9:e55038. doi: 10.7554/eLife.55038 (PMC7239661; doi:10.7554/eLife.55038)
Supplement: Figure 6—source data 1. [file elife-55038-fig6-data1.xlsx]

## Sheet: Panel B
Panel B
Bodipy-LacCer	Bodipy-LacCer	Bodipy-Chol	Bodipy-Chol
15 min	3 h	15 min	3 h
38.8889	75	14.2857	12.5
61.7021	43.9024	6.89655	20.8333
56.25	38.8889	2.38095	5.71429
38.8889	30.5556	3.57143	25
56	47.3684	4.34783	34.6154
68.1818	69.5652	2.85714	21.7391
60	60.6061	6.06061	13.3333
68	63.4146	3.0303	27.7778
65.5172	45.4545	11.1111	12.5
51.4286	66.6667	6.97674	4.7619

## Sheet: Panel C
Panel C
Control (Cav1-mCh)	Bodipy-LacCer	Bodipy-Cholesterol
6.15385	14.2857	9.09091
8	13.4615	3.27869
11.6667	3.57143	1.92308
4.87805	2.12766	20
1.33333	1.26582	4.08163
5.17241	8.62069	13.0435
10.9091	2.85714	15
20.339	8.06452	1.92308
7.14286	5.66038	12.8205
8	14.2857	22.5806

## Sheet: Panel E
Panel E
Bodipy-LacCer	Bodipy-LacCer	Bodipy-Chol	Bodipy-Chol
Cav1 siRNA	Ctrl SiRNA	Cav1 siRNA	Ctrl SiRNA
96.6667	43.75	4.34783	0
66.6667	52.1739	20	3.84615
57.8947	92.8571	16.6667	7.14286
44.4444	67.8571	9.09091	11.1111
58.8235	77.7778	0	9.375
50	53.125	5.88235	11.1111
40	23.0769	7.14286	8
	72.7273	8.69565	0
	15	3.57143	3.44828
	52

## Sheet: Panel H
Panel H
Bodipy-LacCer	Bodipy-LacCer	Bodipy-Chol	Bodipy-Chol
15 min	3 h	15 min	3 h
0	0	100	89.1304
0	0	79.3103	90.9091
0	0	77.2727	88
0	0	91.1765	95.8333
0	0	77.7778	86.1111
0	2.94118	100	91.3043
0	7.40741	79.3103	100
0	0	100	92.5926
0	4.7619	82.3529	100
0	0	92	82.6087

## Sheet: Panel I
Panel I
Bodipy-LacCer	Bodipy-LacCer	Bodipy-Chol	Bodipy-Chol
Cav1 siRNA	Ctrl SiRNA	Cav1 siRNA	Ctrl SiRNA
0	0	64.4444	88.2353
0	6.25	80	80.7692
0	5.88235	72.4138	100
4	0	87.0968	73.5294
0	2.94118	84.6154	92
0	5	80	92.3077
0	0	94.1176	96.6667
0	0	87.8788	70
2.7027	0	84.8485	90
5.55556	0	94.2029	68.75
